# Supplementary material for: CO2 reduction by a Mn electrocatalyst in the presence of a Lewis acid: a DFT study on the reaction mechanism
Source: Royal Society of Chemistry journal article supplement (doi:10.1039/c9se00213h), 2019-01-01
Supplement: c9se00213h1.pdf [file c9se00213h1.pdf]

# CO<sub>2</sub> Reduction by Mn Electrocatalyst in the Presence of Lewis Acid: A DFT Study on the Reaction Mechanism

Miho Isegawa,<sup>\*†</sup> Akhilesh K. Sharma<sup>§</sup>

<sup>†</sup> International Institute for Carbon-Neutral Energy Research (WPI- I<sup>2</sup>CNER),  
Kyushu University 744 Moto-oka, Nishi-ku, Fukuoka 819-0395, Japan

<sup>§</sup> Fukui Institute for Fundamental Chemistry, Kyoto University, Kyoto 606-8103, Japan

\*E-mail addresses: [isegawa.miho.169@m.kyushu-u.ac.jp](mailto:isegawa.miho.169@m.kyushu-u.ac.jp)

## Contents

|                                                                                                      | Page    |
|------------------------------------------------------------------------------------------------------|---------|
| ONIOM partition and schematic representation of application of the artificial force                  | S2      |
| Optimized structures of complexes <b>A0</b> , <b>B0</b> , <b>D0</b> , and their reduced species      | S3      |
| Mn complexes with two Mg(OTf) <sub>2</sub>                                                           | S4      |
| Mn complexes with potassium cation coordination                                                      | S5      |
| Free energy profile of Mg(OTf) <sub>2</sub> removal and CO <sub>2</sub> binding in a stepwise manner | S6      |
| IRC paths                                                                                            | S7-S11  |
| Total electronic energy, and thermal corrections to enthalpy and free energy                         | S12-S13 |
| Cartesian coordinates of optimized structures                                                        | S14-    |

(a)

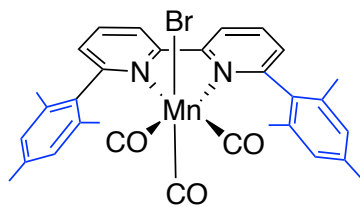

(b)

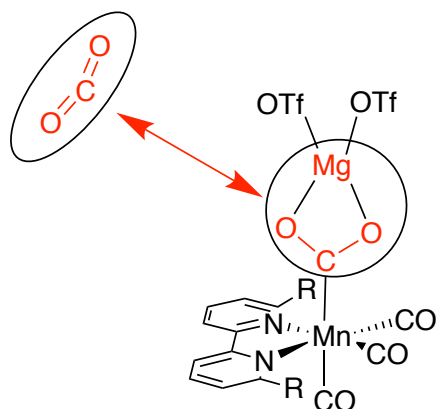

**Figure S1.** (a) Partitioning of the molecule into high- (black) and low- (blue) layers in ONIOM and (b) a schematic diagram showing the application of an artificial force between the highlighted atoms (red).

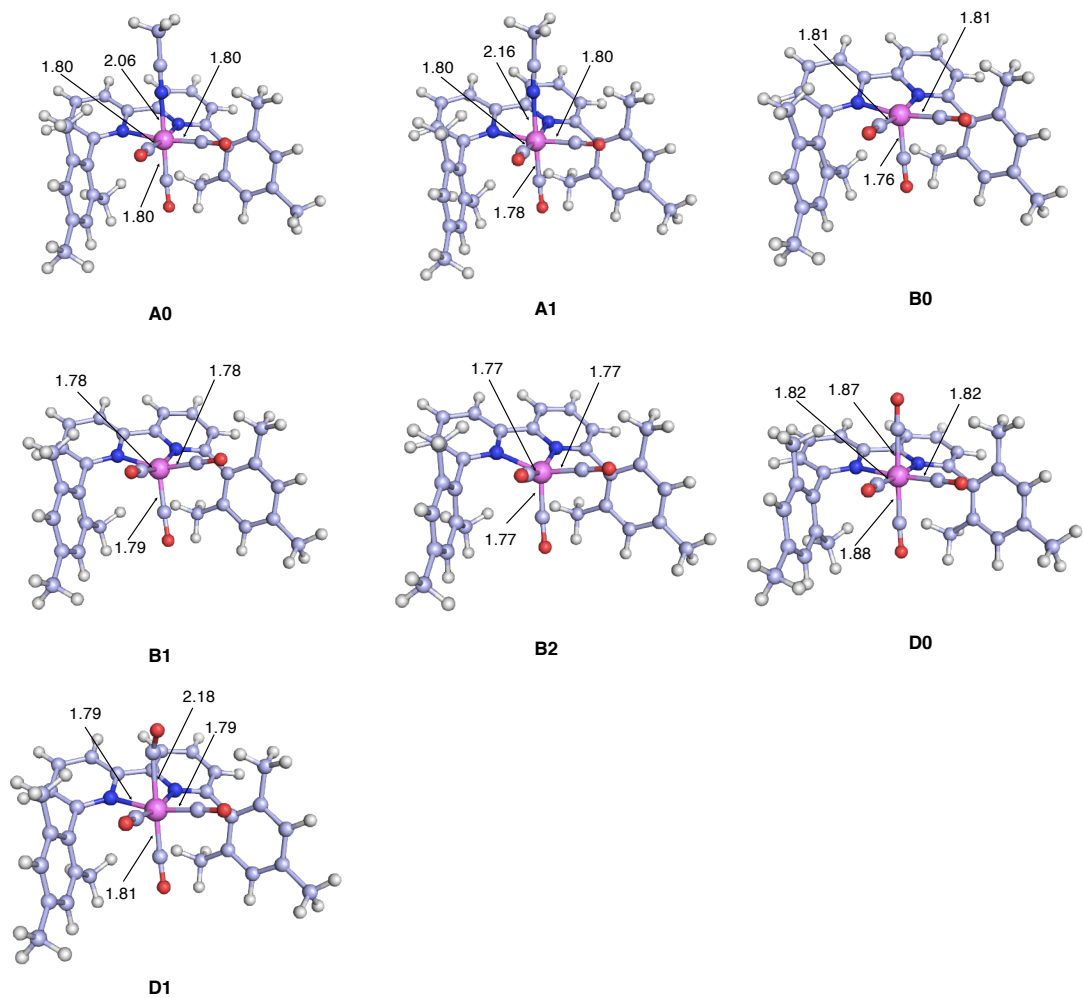

**Figure S2.** Optimized structures of complexes **A0**, **B0**, **D0**, and their reduced species, **A1**, **B1**, **B2**, and **D1**.

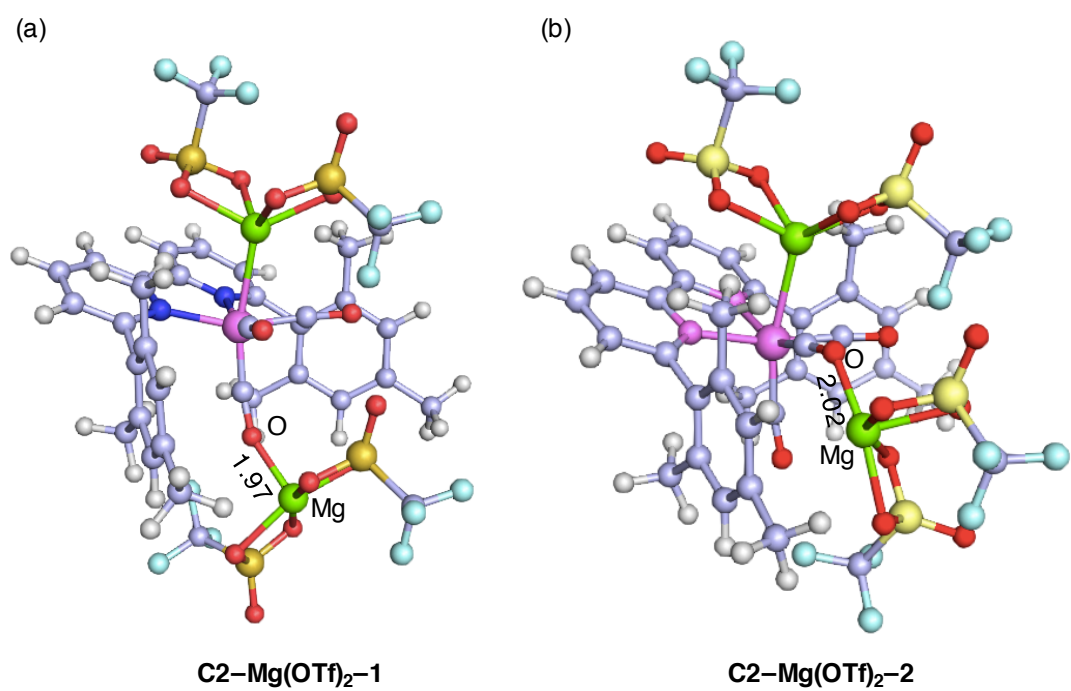

**Figure S3.** Mn complexes with two Mg(OTf)<sub>2</sub>; (a) **C2-Mg(OTf)<sub>2</sub>-1** and (b) **C2-Mg(OTf)<sub>2</sub>-2**.

(a)

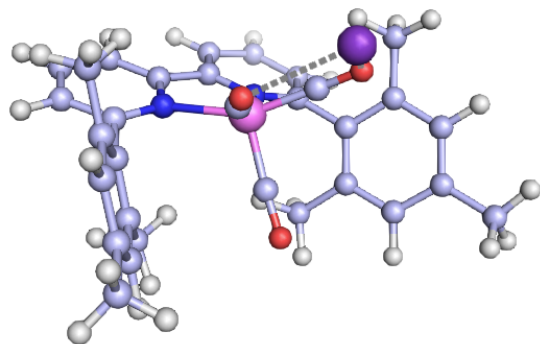

**B1-K<sup>+</sup>**

(b)

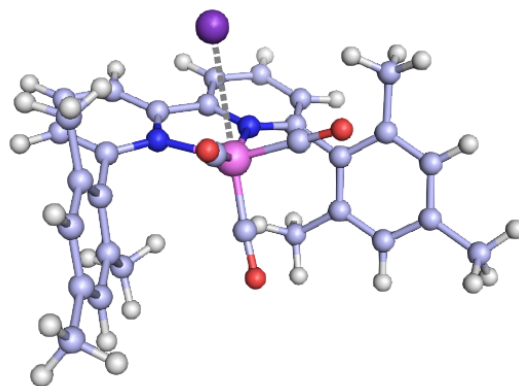

**B2-K<sup>+</sup>**

**Figure S4.** Mn complex with potassium cation; (a) **B1-K<sup>+</sup>** and (b) **B2-K<sup>+</sup>**.

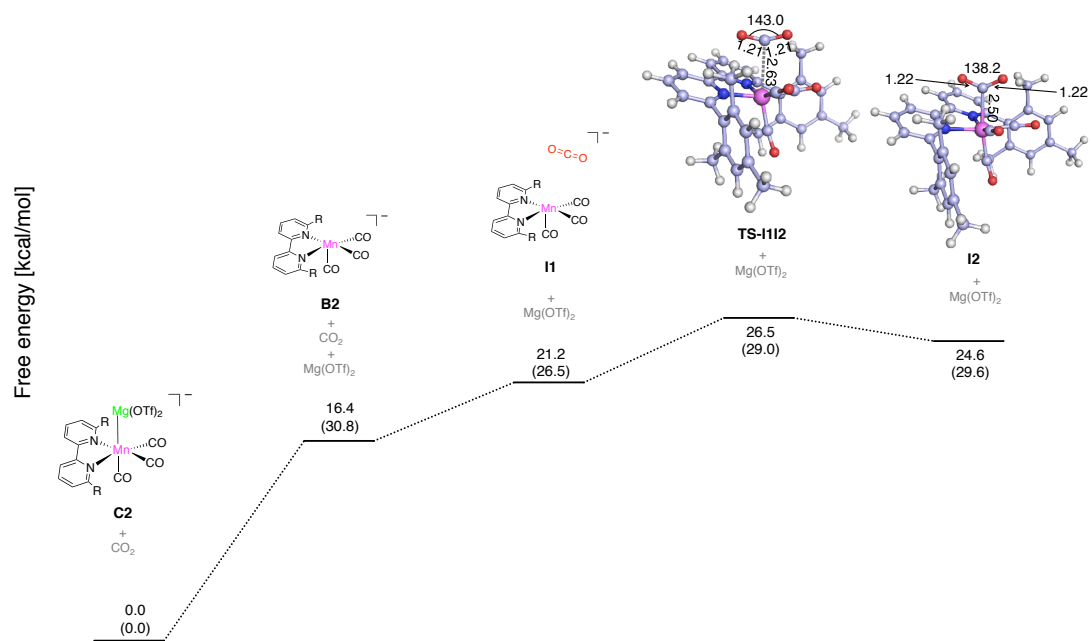

**Figure S5.** Free energy profile of Mg(OTf)<sub>2</sub> removal and CO<sub>2</sub> binding which occurs in a stepwise manner.

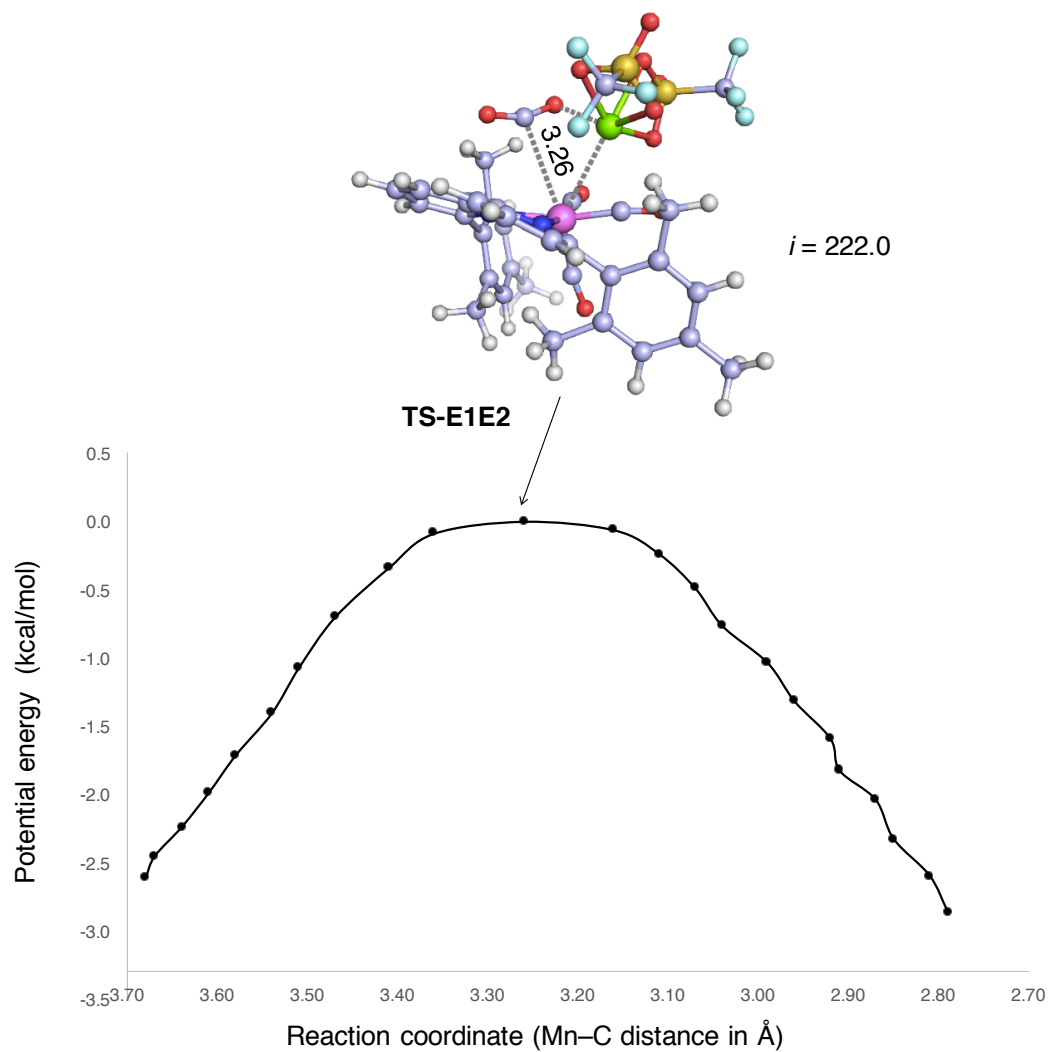

**Figure S6.** IRC path from the TS of 1<sup>st</sup> CO<sub>2</sub> binding. Imaginary frequency ( $i$ ) of the TS is in cm<sup>-1</sup>.

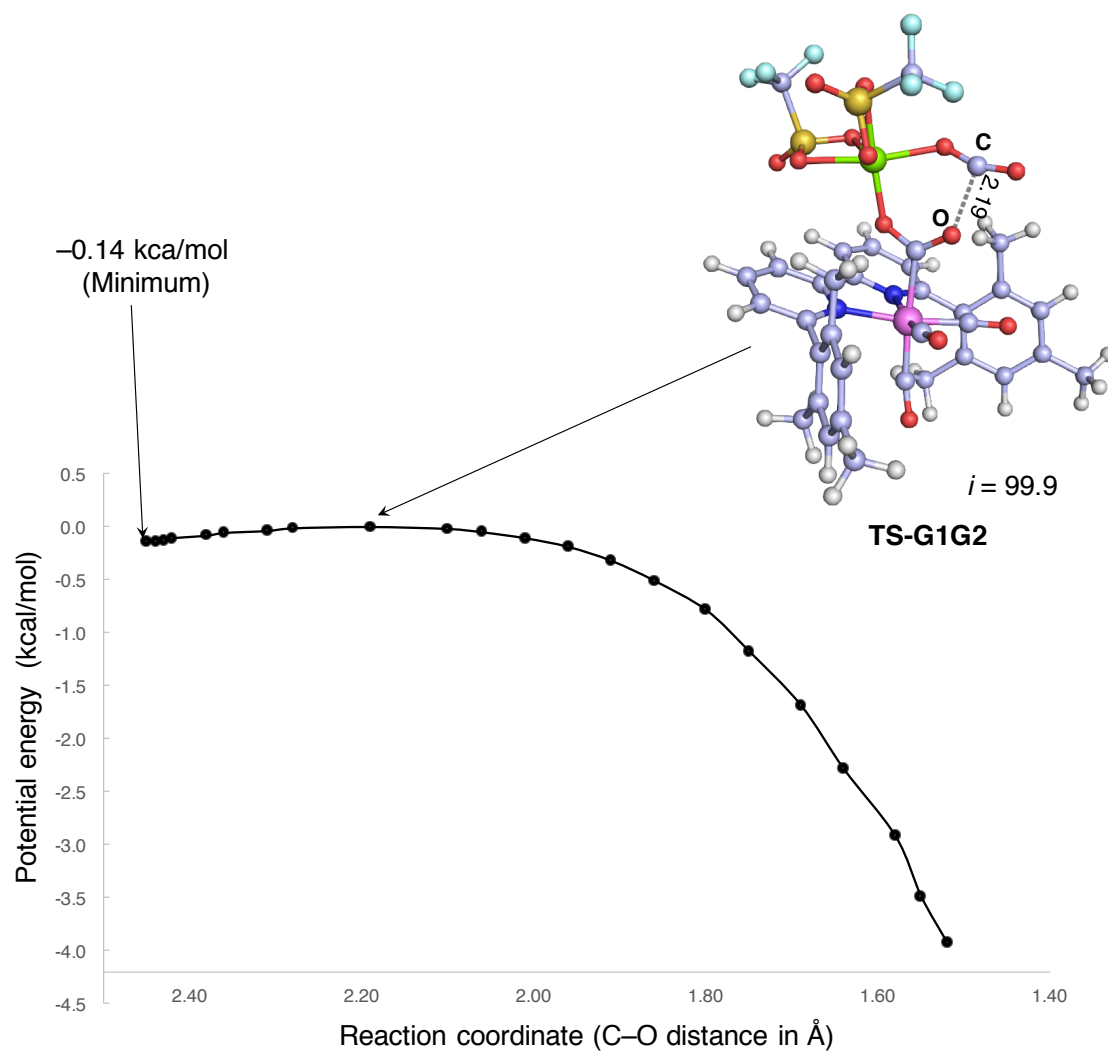

**Figure S7.** IRC path from the TS of 2nd CO<sub>2</sub> binding. Imaginary frequency ( $i$ ) of the TS is in cm<sup>-1</sup>.



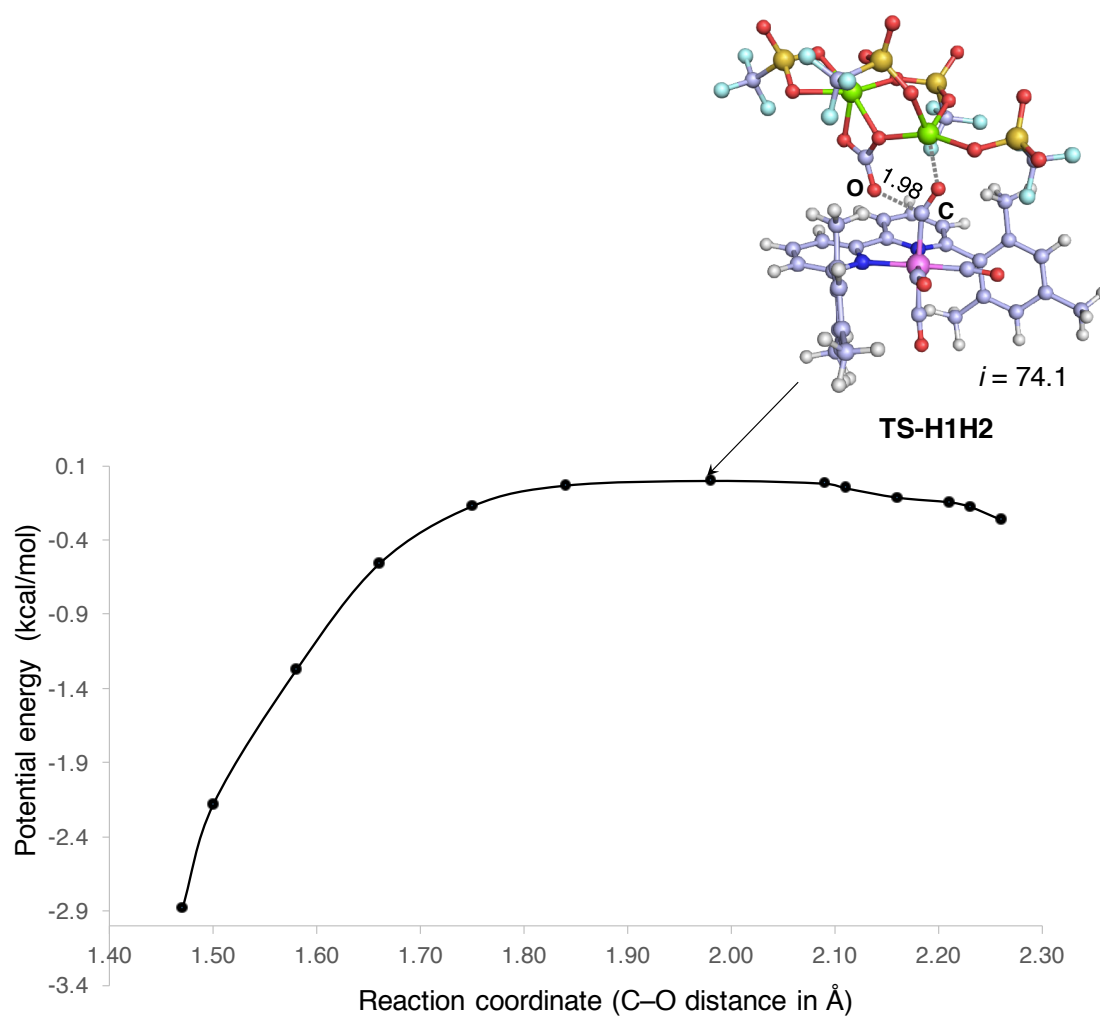

**Figure S8.** IRC path from the TS of C-O bond cleavage. Imaginary frequency ( $i$ ) of the TS is in  $\text{cm}^{-1}$ .

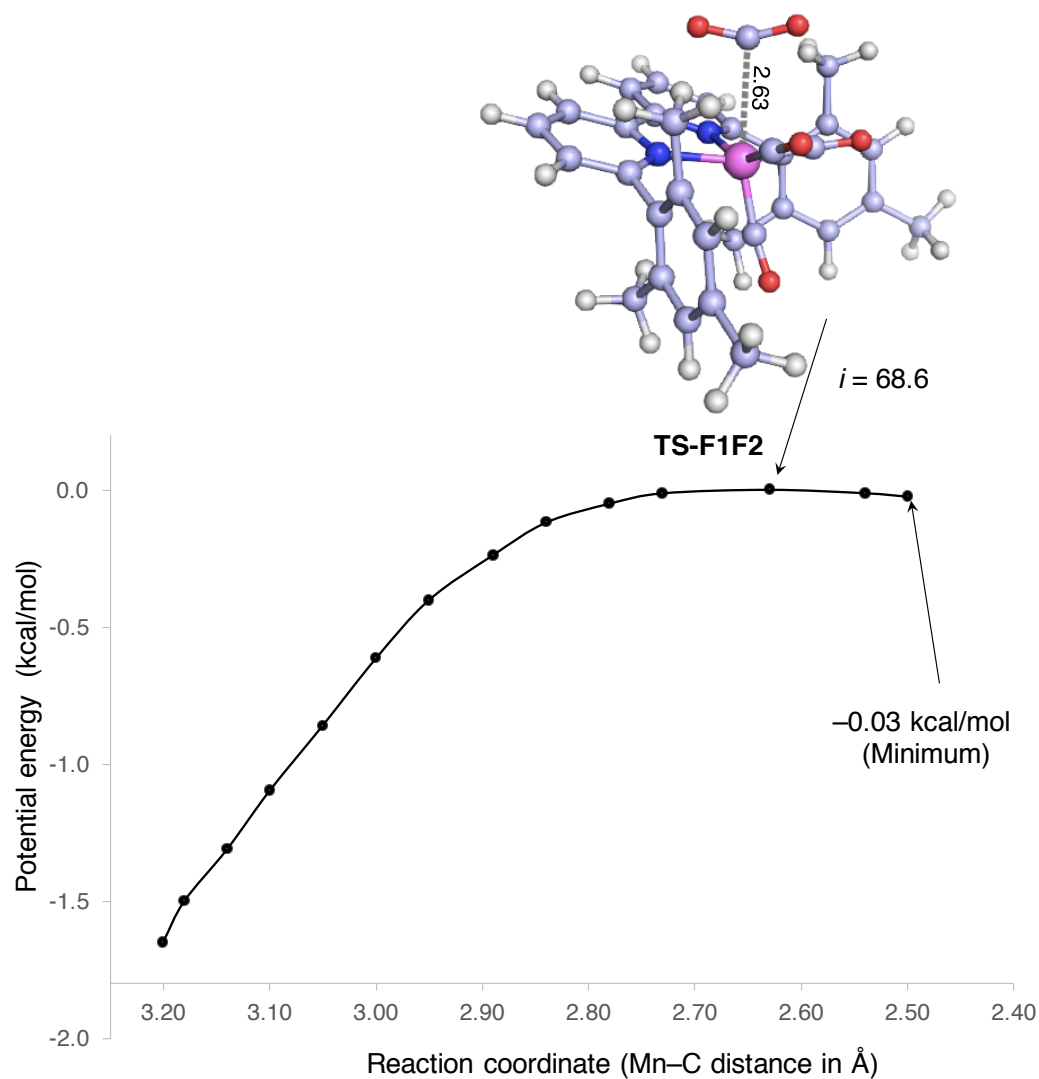

**Figure S9.** IRC path from the TS of CO<sub>2</sub> binding to Mn center in absence of Mg(OTf)<sub>2</sub>. Imaginary frequency ( $i$ ) of the TS is in cm<sup>-1</sup>.

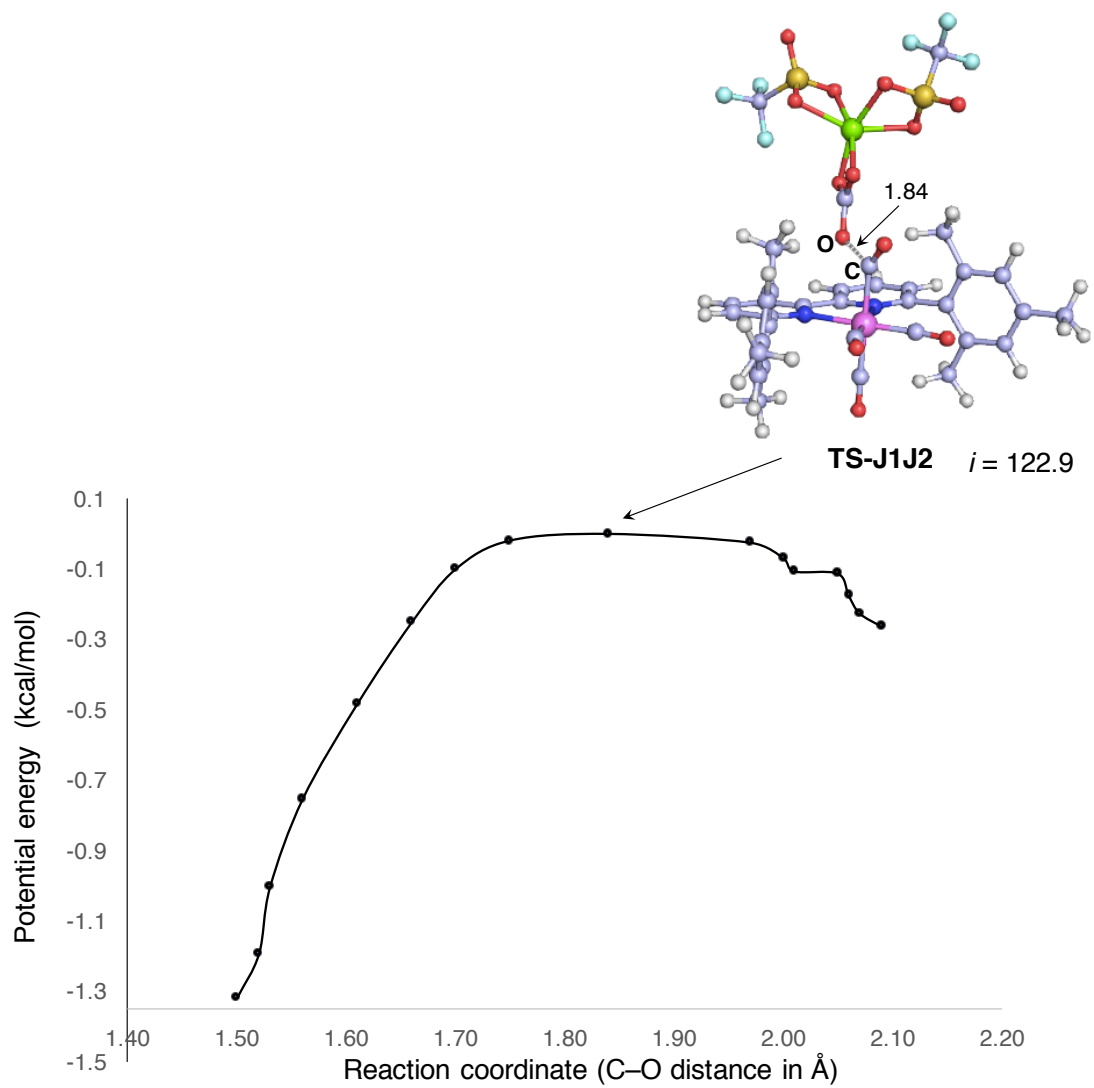

**Figure S10.** IRC path from the TS of C-O bond cleavage with one  $\text{Mg}(\text{OTf})_2$ . Imaginary frequency ( $i$ ) of the TS is in  $\text{cm}^{-1}$ .

**Table S1.** Total electronic energy ( $E_{\text{SCF}}$ ), thermal correction to enthalpy ( $H_{\text{corr}}$ ), and thermal correction to free energy ( $G_{\text{corr}}$ ). All are given in a.u.

| label                        | $E_{\text{SCF}}$ | $E_{\text{SCF}}$ | $H_{\text{corr}}$ | $G_{\text{corr}}$ |
|------------------------------|------------------|------------------|-------------------|-------------------|
| Basis set                    | BS2 <sup>a</sup> | BS1 <sup>a</sup> | BS1 <sup>a</sup>  | BS1 <sup>a</sup>  |
| CO                           | -113.3252595     | -113.2913502     | 0.0083030         | -0.0141450        |
| CO <sub>2</sub>              | -188.6313683     | -188.5751751     | 0.0153730         | -0.0095790        |
| CO <sub>2</sub> <sup>-</sup> | -188.6313683     | -188.6098018     | 0.0126580         | -0.0152630        |
| MeCN                         | -132.7840434     | -132.7447396     | 0.0499350         | 0.0214610         |
| Mg(OTf) <sub>2</sub>         | -2123.3545076    | -2122.9732095    | 0.0767050         | 0.0107740         |
| <b>A0</b>                    | -1770.7796922    | -1770.3606184    | 0.6036510         | 0.4884050         |
| <b>A1</b>                    | -1770.8841837    | -1770.4591191    | 0.5993910         | 0.4848680         |
| <b>B0</b>                    | -1637.9649130    | -1637.5829816    | 0.5514620         | 0.4474210         |
| <b>B1</b>                    | -1638.0974085    | -1637.7125665    | 0.5494060         | 0.4428120         |
| <b>B2</b>                    | -1638.2039204    | -1637.8133096    | 0.5475310         | 0.4417100         |
| <b>D0</b>                    | -1751.3299760    | -1750.9176493    | 0.5618280         | 0.4513700         |
| <b>D1</b>                    | -1751.4398737    | -1751.0239031    | 0.5591670         | 0.4462930         |
| <b>A0-O1</b>                 | -3894.1583214    | -3893.3597461    | 0.6831090         | 0.5307280         |
| <b>A0-O2</b>                 | -3894.1550466    | -3893.3553081    | 0.6827600         | 0.5230850         |
| <b>A0-C1</b>                 | -3894.1450762    | -3893.3452191    | 0.6828020         | 0.5263110         |
| <b>A0-C3</b>                 | -3894.1531112    | -3893.3531025    | 0.6828480         | 0.5220250         |
| <b>A0-C4</b>                 | -3894.1505410    | -3893.3510293    | 0.6830070         | 0.5238880         |
| <b>A0-Z2</b>                 | -3894.1534896    | -3893.3531556    | 0.6833030         | 0.5245740         |
| <b>A1-C1</b>                 | -3894.2623595    | -3893.4574186    | 0.6797210         | 0.5205490         |
| <b>A1-C2</b>                 | -3894.2638331    | -3893.4580580    | 0.6790310         | 0.5206940         |
| <b>A1-C3</b>                 | -3894.2577133    | -3893.4520078    | 0.6795300         | 0.5151200         |
| <b>A1-C4</b>                 | -3894.2555855    | -3893.4502287    | 0.6772970         | 0.5183020         |
| <b>A1-Z2</b>                 | -3894.2607441    | -3893.4545509    | 0.6793700         | 0.5138170         |
| <b>B0-O1</b>                 | -3761.3370940    | -3760.5759763    | 0.6321250         | 0.4904760         |
| <b>B0-O2</b>                 | -3761.3391128    | -3760.5781818    | 0.6316940         | 0.4899990         |
| <b>B0-C1</b>                 | -3761.3364897    | -3760.5746719    | 0.6310550         | 0.4872920         |
| <b>B0-C2</b>                 | -3761.3387887    | -3760.5739811    | 0.6314920         | 0.4851440         |
| <b>B0-C3</b>                 | -3761.3380300    | -3760.5743449    | 0.6314610         | 0.4858240         |
| <b>B0-C4</b>                 | -3761.3377645    | -3760.5749574    | 0.6309910         | 0.4849190         |
| <b>B0-Z1</b>                 | -3761.3376236    | -3760.5736759    | 0.6321510         | 0.4881070         |
| <b>B0-Z2</b>                 | -3761.3375161    | -3760.5739608    | 0.6320830         | 0.4878230         |
| <b>B1-Mn</b>                 | -3761.4826484    | -3760.7169221    | 0.6283590         | 0.4826490         |
| <b>B1-O1</b>                 | -3761.4809607    | -3760.7173125    | 0.6289850         | 0.4817860         |
| <b>B1-O2</b>                 | -3761.4829290    | -3760.7197367    | 0.6292400         | 0.4851210         |
| <b>B1-C1</b>                 | -3761.4683662    | -3760.7036861    | 0.6286010         | 0.4834400         |
| <b>B1-C2</b>                 | -3761.4672277    | -3760.7024333    | 0.6287110         | 0.4828460         |
| <b>B1-C3</b>                 | -3761.4698815    | -3760.7032312    | 0.6286640         | 0.4780830         |

<sup>a</sup>See main text.

**Table S1** (Continue) Total electronic energy ( $E_{\text{SCF}}$ ), thermal correction to enthalpy ( $H_{\text{corr}}$ ) and thermal correction to free energy ( $G_{\text{corr}}$ ). All are given in a.u.

| label              | $E_{\text{SCF}}$ | $E_{\text{SCF}}$ | $H_{\text{corr}}$ | $G_{\text{corr}}$ |
|--------------------|------------------|------------------|-------------------|-------------------|
| Basis set          | BS2 <sup>a</sup> | BS1 <sup>a</sup> | BS1 <sup>a</sup>  | BS1 <sup>a</sup>  |
| <b>B1-C4</b>       | -3761.4718289    | -3760.7065658    | 0.6289010         | 0.4801100         |
| <b>B1-Z1</b>       | -3761.4700748    | -3760.7031719    | 0.6290930         | 0.4809480         |
| <b>B1-Z2</b>       | -3761.4714318    | -3760.7053581    | 0.6290770         | 0.4799480         |
| <b>B2-Mn</b>       | -3761.6100012    | -3760.8386579    | 0.6266620         | 0.4778610         |
| <b>B2-O1</b>       | -3761.5960588    | -3760.8276019    | 0.6272880         | 0.4803380         |
| <b>B2-O2</b>       | -3761.5954688    | -3760.8271902    | 0.6277910         | 0.4846750         |
| <b>B2-C1</b>       | -3761.5843028    | -3760.8134765    | 0.6265320         | 0.4773300         |
| <b>B2-C2</b>       | -3761.5833644    | -3760.8125464    | 0.6267650         | 0.4798270         |
| <b>B2-C3</b>       | -3761.5830511    | -3760.8115465    | 0.6272070         | 0.4781880         |
| <b>B2-C4</b>       | -3761.5824561    | -3760.8108784    | 0.6271950         | 0.4790410         |
| <b>B2-Z1</b>       | -3761.5746630    | -3760.8018202    | 0.6269220         | 0.4806190         |
| <b>B2-Z2</b>       | -3761.5818767    | -3760.8103002    | 0.6274590         | 0.4806220         |
| <b>D0-O1</b>       | -3874.7076380    | -3873.9156126    | 0.6415010         | 0.4930730         |
| <b>D0-O2</b>       | -3874.7006425    | -3873.9095346    | 0.6412820         | 0.4934870         |
| <b>D0-C1</b>       | -3874.6970374    | -3873.9040496    | 0.6409280         | 0.4868820         |
| <b>D0-C3</b>       | -3874.7027415    | -3873.9102956    | 0.6414510         | 0.4854180         |
| <b>D0-C4</b>       | -3874.7025009    | -3873.9097811    | 0.6416350         | 0.4905040         |
| <b>D0-Z2</b>       | -3874.7041786    | -3873.9106943    | 0.6415570         | 0.4901280         |
| <b>D1-O1</b>       | -3874.8219865    | -3874.0284421    | 0.6388400         | 0.4834100         |
| <b>D1-O2</b>       | -3874.8185955    | -3874.0232639    | 0.6393950         | 0.4868180         |
| <b>D1-C1</b>       | -3874.8155788    | -3874.0173300    | 0.6376810         | 0.4826300         |
| <b>D1-C2</b>       | -3874.8157025    | -3874.0169834    | 0.6377760         | 0.4824410         |
| <b>D1-C3</b>       | -3874.8172574    | -3874.0215751    | 0.6389360         | 0.4796160         |
| <b>D1-C4</b>       | -3874.8158597    | -3874.0205228    | 0.6393600         | 0.4821120         |
| <b>D1-Z2</b>       | -3874.8168117    | -3874.0208665    | 0.6394700         | 0.4837050         |
| <b>E1</b>          | -3950.2479538    | -3949.4190766    | 0.6451800         | 0.4895430         |
| <b>TS-E1E2</b>     | -3950.2233823    | -3949.3997418    | 0.6424810         | 0.4854220         |
| <b>E2</b>          | -3950.2653448    | -3949.4431419    | 0.6449060         | 0.4893860         |
| <b>F</b>           | -3950.2809078    | -3949.4600935    | 0.6452550         | 0.4906560         |
| <b>G1</b>          | -4138.9049242    | -4138.0261091    | 0.6613420         | 0.4976190         |
| <b>TS_G1G2</b>     | -4138.9041040    | -4138.0258693    | 0.6602370         | 0.4990980         |
| <b>G2</b>          | -4138.9124852    | -4138.0359093    | 0.6619930         | 0.5001440         |
| <b>H1</b>          | -6262.3588739    | -6261.0948859    | 0.7421140         | 0.5459680         |
| <b>TS-H1H2</b>     | -6262.3524183    | -6261.0861671    | 0.7401760         | 0.5428400         |
| <b>C2-MgOTf2-1</b> | -5884.9992883    | -5883.8489641    | 0.7066090         | 0.5225290         |
| <b>C2-MgOTf2-2</b> | -5885.0073345    | -5883.8561451    | 0.7059380         | 0.5254670         |
| <b>B1-K+</b>       | -2237.9496194    | -2237.5349910    | 0.5524510         | 0.4393230         |
| <b>B2-K+</b>       | -2238.0643128    | -2237.6434134    | 0.5506700         | 0.4375520         |
| <b>I1</b>          | -1826.8433376    | -1826.3973514    | 0.5640710         | 0.4478390         |
| <b>TS-I1I2</b>     | -1826.8381923    | -1826.3937269    | 0.5628510         | 0.4510460         |
| <b>I2</b>          | -1826.8382908    | -1826.3938055    | 0.5639860         | 0.4481800         |
| <b>TS-J1J2</b>     | -4138.8891484    | -4138.0147049    | 0.6601470         | 0.4941130         |

<sup>a</sup>See main text.

### Cartesian Coordinates

#### CO

C 0.000000 0.000000 -0.651859  
O 0.000000 0.000000 0.488894

#### CO2

C 0.000000 0.000000 -0.000003  
O 0.000000 0.000000 -1.168594  
O 0.000000 0.000000 1.168596

#### CO2-

C 0.000000 0.358295 0.000000  
O 1.147926 -0.134304 -0.000000  
O -1.147926 -0.134417 0.000000

#### MeCN

C 1.172589 -0.000054 -0.000017  
H 1.551077 0.639507 0.803382  
H 1.550628 -1.015896 0.151842  
H 1.550495 0.376142 -0.955789  
C -0.271198 0.000193 0.000209  
N -1.437221 -0.000083 -0.000084

#### MgOTf2

Mg 0.037014 -1.062702 -0.039102  
S 2.065810 0.639404 -0.016402  
O 2.367606 2.056605 -0.024902  
O 1.365711 0.059702 -1.217002  
O 1.325811 0.081302 1.169498  
C 3.687212 -0.240591 0.019498  
F 4.398311 0.091811 -1.053702  
F 3.476016 -1.558492 0.019498  
F 4.350411 0.099911 1.120398  
S -2.610786 -0.867009 0.006098  
O -1.680286 -0.955207 1.185398  
O -3.820684 -1.664413 0.030198  
O -1.720686 -0.968407 -1.203902  
C -3.132091 0.901489 0.006798  
F -3.788292 1.173887 1.130898  
F -3.919092 1.136587 -1.038802  
F -2.045693 1.673192 -0.071402

#### A0

Mn 0.001843 0.040425 0.555223  
O 0.003918 -2.442141 -1.048106  
O -1.825843 -1.329711 2.431574  
O 1.833543 -1.321298 2.433404  
N 1.318444 1.241101 -0.600421  
N -1.324592 1.238979 -0.593424  
C 0.003961 -1.425945 -0.485119  
C -1.193024 -0.764734 1.638593  
C 1.199235 -0.759144 1.639601  
C 2.655220 1.099485 -0.746811  
C 3.444704 2.147509 -1.225979  
H 4.516496 1.993596 -1.324032  
C 2.853291 3.348466 -1.586269  
H 3.453692 4.175567 -1.957346  
C 1.473807 3.465164 -1.502002  
H 0.984802 4.378539 -1.824280  
C 0.728089 2.392820 -1.015409  
C -0.739874 2.398921 -0.992265  
C -1.494176 3.492075 -1.415048  
H -1.011435 4.419454 -1.705306  
C -2.875935 3.381264 -1.467570  
H -3.483391 4.224290 -1.787989  
C -3.461775 2.167660 -1.141847

H -4.535714 2.019051 -1.222566  
C -2.664327 1.103036 -0.715071  
C 3.285593 -0.210785 -0.460926  
C 3.117019 -1.263937 -1.382355  
C 3.734427 -2.487057 -1.116903  
H 3.599900 -3.306948 -1.824351  
C 4.535875 -2.680275 0.011642  
C 4.724474 -1.602841 0.880624  
H 5.350599 -1.732249 1.764855  
C 4.115651 -0.366878 0.663358  
C 2.372467 -1.065768 -2.670395  
H 2.984883 -0.497772 -3.385505  
H 1.439459 -0.502958 -2.549448  
H 2.128223 -2.025538 -3.137369  
C 5.162242 -4.011511 0.290380  
H 6.090763 -3.910233 0.863596  
H 5.385150 -4.556795 -0.633860  
H 4.490279 -4.649071 0.881557  
C 4.310052 0.754779 1.639432  
H 4.762476 0.392907 2.568992  
H 3.360972 1.245815 1.895684  
H 4.967265 1.538296 1.237703  
C -3.286994 -0.216428 -0.457631  
C -3.102927 -1.253216 -1.397082  
C -3.707655 -2.486012 -1.155794  
H -3.559433 -3.292646 -1.875891  
C -4.512722 -2.707602 -0.033310  
C -4.712054 -1.649936 0.854909  
H -5.334603 -1.803882 1.737628  
C -4.116786 -0.401897 0.660896  
C -2.351921 -1.026650 -2.676866  
H -2.955630 -0.432352 -3.377819  
H -2.116462 -1.975988 -3.169061  
H -1.413253 -0.477699 -2.538155  
C -5.145835 -4.044712 0.198649  
H -5.787175 -4.336681 -0.643044  
H -5.759248 -4.049583 1.106082  
H -4.389726 -4.834046 0.300695  
C -4.324313 0.696245 1.660930  
H -3.385393 1.209647 1.909981  
H -4.749769 0.304491 2.591174  
H -5.011604 1.467173 1.286104  
N -0.003476 1.679548 1.809300  
C -0.010460 2.573227 2.550366  
C -0.019755 3.688041 3.457107  
H 0.888175 4.284886 3.323805  
H -0.893461 4.318436 3.263065  
H -0.061928 3.329291 4.490335

#### A1

Mn -0.002011 0.067178 0.543816  
O -0.010655 -2.446002 -0.978548  
O -1.819809 -1.220277 2.484953  
O 1.816977 -1.231910 2.476052  
N 1.321877 1.221679 -0.592419  
N -1.323638 1.227694 -0.589390  
C -0.007595 -1.413148 -0.436596  
C -1.191162 -0.683053 1.662843  
C 1.187621 -0.690011 1.657562  
C 2.661220 1.079111 -0.768594  
C 3.456658 2.099832 -1.267930  
H 4.525037 1.930987 -1.380191  
C 2.863725 3.326938 -1.631295  
H 3.472305 4.146567 -2.008168  
C 1.499351 3.453577 -1.541924  
H 1.015487 4.373209 -1.860952  
C 0.713864 2.385622 -1.050225

C -0.711419 2.387816 -1.051068  
 C -1.492720 3.455457 -1.550120  
 H -1.005246 4.370562 -1.876585  
 C -2.857500 3.333298 -1.639424  
 H -3.462749 4.152589 -2.022346  
 C -3.455155 2.110658 -1.269000  
 H -4.524185 1.945300 -1.380263  
 C -2.663387 1.089205 -0.765279  
 C 3.289204 -0.235118 -0.475461  
 C 3.120221 -1.293692 -1.392624  
 C 3.732317 -2.518385 -1.128078  
 H 3.593257 -3.339581 -1.834085  
 C 4.532516 -2.714636 0.003045  
 C 4.714819 -1.639968 0.873569  
 H 5.332571 -1.773375 1.763580  
 C 4.108897 -0.400027 0.652751  
 C 2.362635 -1.095269 -2.672740  
 H 2.953823 -0.502852 -3.386124  
 H 1.420468 -0.553522 -2.527745  
 H 2.133207 -2.053571 -3.151130  
 C 5.177003 -4.042275 0.261929  
 H 5.777741 -4.028051 1.178039  
 H 5.834945 -4.339442 -0.565373  
 H 4.429679 -4.840057 0.364980  
 C 4.304596 0.716408 1.635697  
 H 4.682366 0.336852 2.591899  
 H 3.368835 1.256894 1.832803  
 H 5.024949 1.462163 1.272304  
 C -3.296376 -0.221515 -0.467032  
 C -3.136693 -1.282253 -1.383279  
 C -3.753404 -2.503579 -1.113944  
 H -3.621381 -3.326640 -1.819135  
 C -4.549232 -2.694157 0.021240  
 C -4.722465 -1.617212 0.890830  
 H -5.336793 -1.746226 1.783850  
 C -4.111640 -0.380550 0.665165  
 C -2.383467 -1.089416 -2.666796  
 H -2.975706 -0.497420 -3.379654  
 H -2.158307 -2.049608 -3.143419  
 H -1.439311 -0.549788 -2.526716  
 C -5.198552 -4.018428 0.285319  
 H -5.859977 -4.315005 -0.539404  
 H -5.796630 -3.999436 1.203076  
 H -4.454237 -4.819033 0.388362  
 C -4.297459 0.738816 1.646697  
 H -3.358117 1.274938 1.838761  
 H -4.673169 0.363185 2.605253  
 H -5.015505 1.487495 1.284708  
 N 0.009413 1.806480 1.819586  
 C 0.033525 2.629678 2.639763  
 C 0.068136 3.655884 3.648366  
 H 0.055786 3.203247 4.645063  
 H 0.978506 4.254367 3.542199  
 H -0.801538 4.312698 3.546713

B0

Mn 0.007063 0.161559 0.825545  
 O -0.006760 -2.137728 -0.982850  
 O -1.862565 -1.385620 2.528890  
 O 1.881114 -1.390557 2.520318  
 N 1.309925 1.514811 -0.070182  
 N -1.312518 1.512622 -0.038650  
 C 0.000084 -1.196241 -0.300560  
 C -1.202641 -0.742213 1.824277  
 C 1.222375 -0.744441 1.817145  
 C 2.642491 1.389934 -0.277570  
 C 3.436722 2.513261 -0.513875

H 4.502455 2.377057 -0.678772  
 C 2.858546 3.773747 -0.552175  
 H 3.466907 4.657317 -0.729158  
 C 1.483840 3.889946 -0.400767  
 H 1.005444 4.861391 -0.472203  
 C 0.729644 2.740834 -0.177630  
 C -0.738051 2.742185 -0.137779  
 C -1.503518 3.896792 -0.278480  
 H -1.031548 4.872914 -0.324537  
 C -2.883574 3.781230 -0.372302  
 H -3.501517 4.669010 -0.482288  
 C -3.456409 2.517637 -0.367787  
 H -4.526917 2.383827 -0.500272  
 C -2.650900 1.388973 -0.206417  
 C 3.239014 0.035824 -0.304596  
 C 2.950123 -0.823495 -1.386826  
 C 3.521700 -2.094823 -1.398116  
 H 3.293751 -2.764325 -2.229189  
 C 4.385432 -2.526907 -0.386148  
 C 4.685600 -1.639910 0.648559  
 H 5.357352 -1.958522 1.446993  
 C 4.134507 -0.358416 0.705511  
 C 2.119346 -0.366857 -2.550979  
 H 2.675007 0.358077 -3.162748  
 H 1.189812 0.131898 -2.251616  
 H 1.851759 -1.208794 -3.198092  
 C 4.970253 -3.904782 -0.419861  
 H 5.687055 -4.060103 0.393558  
 H 5.486746 -4.099317 -1.368399  
 H 4.190148 -4.672011 -0.328144  
 C 4.464616 0.549398 1.852760  
 H 4.925585 -0.010029 2.673920  
 H 3.575809 1.057622 2.248805  
 H 5.170466 1.338184 1.558716  
 C -3.238370 0.033452 -0.282396  
 C -2.940484 -0.782300 -1.396621  
 C -3.511055 -2.052182 -1.463378  
 H -3.278128 -2.686252 -2.320488  
 C -4.379369 -2.526716 -0.474613  
 C -4.684389 -1.684183 0.595028  
 H -5.359670 -2.036460 1.376114  
 C -4.137523 -0.404298 0.706506  
 C -2.103897 -0.281091 -2.538519  
 H -2.655993 0.467806 -3.124186  
 H -1.835362 -1.097937 -3.216731  
 H -1.175226 0.204830 -2.216683  
 C -4.962871 -3.902237 -0.568851  
 H -5.458065 -4.063547 -1.534748  
 H -5.696925 -4.085324 0.223094  
 H -4.184616 -4.672489 -0.486550  
 C -4.482183 0.454226 1.887123  
 H -3.612083 0.999426 2.274112  
 H -4.890216 -0.151329 2.703649  
 H -5.239142 1.209239 1.634226

B1

Mn 0.001991 0.039341 0.682111  
 O 0.017823 -2.334671 -1.090154  
 O -1.805173 -1.332371 2.566487  
 O 1.800993 -1.288228 2.606452  
 N 1.304581 1.501177 -0.038172  
 N -1.308546 1.499176 -0.026963  
 C 0.015559 -1.349229 -0.452675  
 C -1.158410 -0.748308 1.778558  
 C 1.157860 -0.723054 1.801939  
 C 2.647541 1.397949 -0.233192  
 C 3.438520 2.522163 -0.453573

H 4.508697 2.389922 -0.595697  
 C 2.856889 3.785208 -0.508910  
 H 3.463701 4.672114 -0.674884  
 C 1.480882 3.884804 -0.390880  
 H 0.994672 4.851303 -0.480723  
 C 0.725206 2.730816 -0.172820  
 C -0.733178 2.731825 -0.149285  
 C -1.496019 3.891012 -0.305802  
 H -1.014870 4.862360 -0.365329  
 C -2.874519 3.791490 -0.392493  
 H -3.487328 4.682078 -0.509455  
 C -3.452134 2.525558 -0.369985  
 H -4.524573 2.395304 -0.495498  
 C -2.654805 1.397092 -0.199296  
 C 3.271218 0.052246 -0.266713  
 C 3.059905 -0.776519 -1.388928  
 C 3.667327 -2.030537 -1.419812  
 H 3.496942 -2.675225 -2.284126  
 C 4.493296 -2.478073 -0.382586  
 C 4.717062 -1.622051 0.695528  
 H 5.361841 -1.949827 1.512823  
 C 4.126056 -0.357678 0.769808  
 C 2.253133 -0.304433 -2.562374  
 H 2.780796 0.489809 -3.109792  
 H 1.283310 0.112165 -2.263760  
 H 2.064536 -1.122195 -3.266377  
 C 5.116048 -3.839499 -0.435289  
 H 5.826955 -3.991097 0.384399  
 H 5.649134 -4.004271 -1.380373  
 H 4.357073 -4.630269 -0.365227  
 C 4.390359 0.524185 1.953811  
 H 4.787314 -0.055955 2.794181  
 H 3.483322 1.036365 2.298032  
 H 5.126328 1.306971 1.722593  
 C -3.273400 0.050479 -0.261805  
 C -3.046447 -0.760138 -1.394898  
 C -3.649723 -2.015183 -1.452795  
 H -3.468380 -2.644528 -2.326160  
 C -4.486292 -2.482055 -0.432718  
 C -4.723974 -1.644738 0.656864  
 H -5.376052 -1.988160 1.461814  
 C -4.137548 -0.380197 0.758848  
 C -2.229831 -0.268006 -2.553376  
 H -2.744178 0.548708 -3.079964  
 H -2.052155 -1.069341 -3.278836  
 H -1.254625 0.125824 -2.241954  
 C -5.105240 -3.843650 -0.515366  
 H -5.627288 -3.993506 -1.469057  
 H -5.824939 -4.010445 0.293605  
 H -4.345264 -4.633875 -0.450213  
 C -4.414644 0.476658 1.958370  
 H -3.513131 0.988015 2.317861  
 H -4.811875 -0.123341 2.784570  
 H -5.155313 1.258464 1.739521

B2

Mn 0.000386 -0.058031 0.528719  
 O -0.005272 -2.261587 -1.422192  
 O -1.751291 -1.495102 2.408809  
 O 1.751518 -1.523656 2.386902  
 N 1.292847 1.462528 0.038459  
 N -1.293201 1.462439 0.034667  
 C -0.004949 -1.313353 -0.712899  
 C -1.124864 -0.874994 1.619010  
 C 1.126808 -0.891088 1.605741  
 C 2.662879 1.396640 -0.110031  
 C 3.446635 2.522605 -0.273411

H 4.523767 2.396513 -0.368780  
 C 2.860498 3.798635 -0.353355  
 H 3.470388 4.690079 -0.480608  
 C 1.487379 3.873393 -0.320101  
 H 0.991882 4.834232 -0.432906  
 C 0.713852 2.711100 -0.147985  
 C -0.714088 2.710759 -0.151102  
 C -1.487571 3.872193 -0.329646  
 H -0.992192 4.832842 -0.444528  
 C -2.860491 3.796512 -0.367600  
 H -3.470297 4.687230 -0.500340  
 C -3.446569 2.520724 -0.284513  
 H -4.523456 2.394043 -0.381737  
 C -2.662692 1.395530 -0.115728  
 C 3.333218 0.070655 -0.175163  
 C 3.250219 -0.683056 -1.366317  
 C 3.916781 -1.904771 -1.442725  
 H 3.841980 -2.488574 -2.362649  
 C 4.694138 -2.389879 -0.383875  
 C 4.800418 -1.604544 0.762761  
 H 5.405907 -1.960579 1.598671  
 C 4.136482 -0.379387 0.884700  
 C 2.510064 -0.156510 -2.559574  
 H 3.029399 0.708742 -2.996380  
 H 1.497792 0.179895 -2.301124  
 H 2.423795 -0.919475 -3.341413  
 C 5.394781 -3.710311 -0.491392  
 H 5.999379 -3.920737 0.397988  
 H 6.059628 -3.746896 -1.364575  
 H 4.681847 -4.537167 -0.610745  
 C 4.273102 0.420899 2.146032  
 H 4.609922 -0.209182 2.977238  
 H 3.324281 0.886138 2.439777  
 H 5.004608 1.234351 2.038133  
 C -3.332675 0.069108 -0.176863  
 C -3.250736 -0.686955 -1.366593  
 C -3.916413 -1.909295 -1.439776  
 H -3.842233 -2.494923 -2.358592  
 C -4.691494 -2.393197 -0.378704  
 C -4.797341 -1.605396 0.766272  
 H -5.401781 -1.960044 1.603531  
 C -4.134978 -0.378926 0.884558  
 C -2.512652 -0.162027 -2.561878  
 H -3.035338 0.699635 -3.001794  
 H -2.423699 -0.927449 -3.341010  
 H -1.501592 0.179049 -2.304899  
 C -5.390237 -3.714946 -0.482409  
 H -6.054734 -3.755125 -1.355693  
 H -5.994750 -3.923647 0.407433  
 H -4.676044 -4.541107 -0.599095  
 C -4.274374 0.425401 2.142990  
 H -3.329456 0.901621 2.431265  
 H -4.601706 -0.204392 2.978165  
 H -5.014871 1.230600 2.034097

D0

Mn 0.000129 -0.052812 0.566552  
 O 0.005994 -1.866344 -1.852837  
 O -1.793986 -2.056142 1.808671  
 O 1.800809 -2.039856 1.824171  
 N 1.322016 1.441218 -0.186296  
 N -1.338537 1.437408 -0.168378  
 C 0.004577 -1.096921 -0.995820  
 C -1.195675 -1.219339 1.276449  
 C 1.201193 -1.208950 1.284265  
 C 2.664086 1.350984 -0.336494  
 C 3.439395 2.482127 -0.602309



H 4.514019 2.361712 -0.714208  
 C 2.835007 3.721062 -0.739135  
 H 3.424844 4.610642 -0.945610  
 C 1.455200 3.800929 -0.638167  
 H 0.955484 4.753001 -0.779473  
 C 0.720160 2.648139 -0.366490  
 C -0.745042 2.651360 -0.324125  
 C -1.492898 3.816509 -0.486568  
 H -1.002665 4.779108 -0.583316  
 C -2.876295 3.737155 -0.522806  
 H -3.476423 4.635906 -0.640873  
 C -3.472960 2.489495 -0.438946  
 H -4.551002 2.371840 -0.514311  
 C -2.685255 1.348404 -0.270192  
 C 3.336052 0.031015 -0.289685  
 C 3.309743 -0.789728 -1.435665  
 C 3.981888 -2.011872 -1.393990  
 H 3.955678 -2.655696 -2.274605  
 C 4.713871 -2.413003 -0.272112  
 C 4.765796 -1.552763 0.827184  
 H 5.334191 -1.848500 1.710214  
 C 4.089001 -0.333568 0.840347  
 C 2.669390 -0.328185 -2.712264  
 H 3.351719 0.337481 -3.260187  
 H 1.745542 0.242401 -2.557726  
 H 2.440602 -1.171910 -3.371625  
 C 5.413726 -3.736481 -0.249467  
 H 6.151749 -3.790240 0.558342  
 H 5.926324 -3.939938 -1.197336  
 H 4.701321 -4.558555 -0.095990  
 C 4.118277 0.542592 2.056264  
 H 4.601876 0.035284 2.897615  
 H 3.105644 0.830842 2.373795  
 H 4.664114 1.478746 1.875736  
 C -3.341813 0.020832 -0.281474  
 C -3.274953 -0.761563 -1.453088  
 C -3.924599 -1.996283 -1.466052  
 H -3.868545 -2.609459 -2.366916  
 C -4.671679 -2.448780 -0.374073  
 C -4.763478 -1.626838 0.751396  
 H -5.342868 -1.963186 1.612407  
 C -4.111032 -0.395950 0.819305  
 C -2.619996 -0.247854 -2.702371  
 H -3.293237 0.446437 -3.225462  
 H -2.391717 -1.063632 -3.396097  
 H -1.693474 0.308631 -2.517046  
 C -5.344016 -3.786063 -0.410140  
 H -5.817555 -3.975246 -1.380923  
 H -6.109242 -3.876133 0.368572  
 H -4.620314 -4.597199 -0.251165  
 C -4.179266 0.433979 2.065988  
 H -3.179899 0.748908 2.399771  
 H -4.646879 -0.122515 2.885020  
 H -4.760726 1.354140 1.917854  
 C -0.009320 0.900598 2.179949  
 O -0.020400 1.452444 3.189267

D1

Mn 0.001121 0.040752 0.632194  
 O 0.002035 -2.277217 -1.215152  
 O -1.813237 -1.479368 2.388023  
 O 1.817371 -1.474289 2.390272  
 N 1.318723 1.417826 -0.276866  
 N -1.324529 1.415566 -0.266413  
 C 0.003233 -1.293053 -0.586974  
 C -1.174984 -0.841627 1.644541  
 C 1.178533 -0.839442 1.644845

C 2.651035 1.304396 -0.487712  
 C 3.437216 2.410392 -0.804422  
 H 4.505525 2.271757 -0.952631  
 C 2.844739 3.664295 -0.935869  
 H 3.442923 4.539203 -1.180297  
 C 1.474721 3.771885 -0.786186  
 H 0.985899 4.730207 -0.931612  
 C 0.723815 2.635220 -0.459318  
 C -0.734484 2.637158 -0.436233  
 C -1.495281 3.782583 -0.704549  
 H -1.013178 4.748295 -0.820642  
 C -2.868370 3.675963 -0.824236  
 H -3.474259 4.557255 -1.022298  
 C -3.455111 2.416262 -0.723278  
 H -4.525746 2.279280 -0.855155  
 C -2.660478 1.303801 -0.454094  
 C 3.284182 -0.035930 -0.416922  
 C 3.119490 -0.935501 -1.489890  
 C 3.741146 -2.181675 -1.419756  
 H 3.607469 -2.882878 -2.245646  
 C 4.541656 -2.547672 -0.331783  
 C 4.716464 -1.622932 0.698084  
 H 5.334910 -1.890394 1.556610  
 C 4.103190 -0.368021 0.674337  
 C 2.349950 -0.544804 -2.717267  
 H 2.918804 0.175016 -3.323320  
 H 1.392872 -0.063491 -2.480369  
 H 2.142065 -1.415320 -3.348699  
 C 5.187585 -3.898373 -0.279608  
 H 5.872347 -3.986553 0.571034  
 H 5.755363 -4.110463 -1.194558  
 H 4.439530 -4.697073 -0.186343  
 C 4.290984 0.585716 1.816797  
 H 4.690561 0.070965 2.697551  
 H 3.348166 1.068931 2.107801  
 H 4.990976 1.394338 1.564513  
 C -3.285405 -0.041258 -0.411785  
 C -3.105860 -0.920231 -1.499928  
 C -3.719254 -2.171558 -1.457441  
 H -3.574845 -2.856275 -2.295258  
 C -4.524052 -2.564051 -0.381957  
 C -4.712347 -1.660310 0.664003  
 H -5.334104 -1.948522 1.513375  
 C -4.109271 -0.400075 0.667464  
 C -2.329808 -0.503577 -2.714690  
 H -2.890066 0.237522 -3.302780  
 H -2.128233 -1.359242 -3.368124  
 H -1.368862 -0.038114 -2.462843  
 C -5.160375 -3.920100 -0.360237  
 H -5.728537 -4.114449 -1.278929  
 H -5.843014 -4.033063 0.489152  
 H -4.406606 -4.715502 -0.287500  
 C -4.313193 0.529798 1.826794  
 H -3.380088 1.027764 2.123713  
 H -4.699132 -0.008838 2.699334  
 H -5.031644 1.327108 1.591050  
 C 0.000035 1.531084 2.220360  
 O -0.008007 1.617102 3.384662

A0-O1

Mn -1.331181 -0.387068 -0.350373  
 O -0.495577 2.329383 0.492052  
 O 1.508758 -0.510762 0.340587  
 N -1.839302 -2.372595 -0.899557  
 N -3.422702 -0.204454 -0.735488  
 C -0.951780 1.316026 0.164779  
 C 0.374213 -0.594629 0.037884

|    |           |           |           |       |           |           |           |
|----|-----------|-----------|-----------|-------|-----------|-----------|-----------|
| C  | -0.997274 | -3.428779 | -1.001135 | S     | 2.588017  | 0.870419  | 3.275137  |
| C  | -1.454966 | -4.686519 | -1.399686 | O     | 2.163158  | 1.790968  | 2.164042  |
| H  | -0.740973 | -5.503579 | -1.468258 | O     | 3.075826  | 1.476560  | 4.499084  |
| C  | -2.792924 | -4.871053 | -1.706746 | O     | 3.453520  | -0.165889 | 2.611089  |
| H  | -3.163640 | -5.839960 | -2.031907 | C     | 1.017900  | -0.027787 | 3.750102  |
| C  | -3.653842 | -3.791942 | -1.591689 | F     | 1.072717  | -0.379341 | 5.029802  |
| H  | -4.704356 | -3.912557 | -1.831548 | F     | 0.859164  | -1.123073 | 3.007917  |
| C  | -3.156339 | -2.556007 | -1.178412 | F     | -0.021084 | 0.787536  | 3.559106  |
| C  | -4.029609 | -1.385234 | -1.028151 | N     | -1.948523 | -0.920033 | 1.512869  |
| C  | -5.413358 | -1.484043 | -1.171180 | C     | -2.235396 | -1.206186 | 2.599754  |
| H  | -5.880767 | -2.438977 | -1.384441 | C     | -2.540078 | -1.544936 | 3.962454  |
| C  | -6.196801 | -0.350330 | -1.028145 | H     | -2.338224 | -0.683971 | 4.609423  |
| H  | -7.277166 | -0.409532 | -1.134698 | H     | -1.913344 | -2.385236 | 4.282221  |
| C  | -5.573051 | 0.855084  | -0.754586 | H     | -3.593177 | -1.826671 | 4.060833  |
| H  | -6.142793 | 1.774394  | -0.645882 |       |           |           |           |
| C  | -4.183799 | 0.907189  | -0.611087 | A0-O2 |           |           |           |
| C  | 0.445078  | -3.281815 | -0.684112 | Mn    | 1.302665  | 0.944233  | 0.015128  |
| C  | 0.896517  | -3.582806 | 0.618421  | O     | 0.022803  | 3.331218  | 1.221647  |
| C  | 2.258099  | -3.479004 | 0.891713  | O     | 2.345001  | 1.258667  | 2.769484  |
| H  | 2.608974  | -3.682110 | 1.905568  | N     | 2.395004  | -0.686812 | -0.792153 |
| C  | 3.182237  | -3.115015 | -0.094498 | N     | 0.565601  | 0.892339  | -1.981079 |
| C  | 2.711755  | -2.867617 | -1.384826 | C     | 0.445891  | 2.432485  | 0.625376  |
| H  | 3.419421  | -2.585932 | -2.165315 | C     | 2.029303  | 1.022748  | 1.679794  |
| C  | 1.355408  | -2.955731 | -1.705629 | C     | 3.342469  | -1.427427 | -0.170247 |
| C  | -0.062710 | -4.026163 | 1.681704  | C     | 4.084274  | -2.384817 | -0.866432 |
| H  | -0.359409 | -5.074617 | 1.534765  | H     | 4.833537  | -2.957134 | -0.325372 |
| H  | -0.989252 | -3.439686 | 1.676243  | C     | 3.865067  | -2.584746 | -2.219662 |
| H  | 0.384380  | -3.950818 | 2.678791  | H     | 4.446054  | -3.315143 | -2.777450 |
| C  | 4.638978  | -3.000179 | 0.233947  | C     | 2.878690  | -1.842226 | -2.846346 |
| H  | 5.231754  | -2.727220 | -0.645051 | H     | 2.679968  | -1.983238 | -3.903305 |
| H  | 5.035042  | -3.943731 | 0.631731  | C     | 2.145848  | -0.914797 | -2.107173 |
| H  | 4.819943  | -2.241216 | 1.007398  | C     | 1.063547  | -0.135574 | -2.716140 |
| C  | 0.903607  | -2.742785 | -3.119351 | C     | 0.570630  | -0.442112 | -3.984260 |
| H  | 1.532836  | -2.007405 | -3.631507 | H     | 0.955647  | -1.295961 | -4.531352 |
| H  | -0.136694 | -2.406564 | -3.187914 | C     | -0.429721 | 0.342591  | -4.533997 |
| H  | 0.966523  | -3.679501 | -3.691876 | H     | -0.835405 | 0.113198  | -5.516317 |
| C  | -3.570248 | 2.235071  | -0.356886 | C     | -0.883832 | 1.434639  | -3.812699 |
| C  | -3.514486 | 2.758246  | 0.947490  | H     | -1.640256 | 2.103454  | -4.215987 |
| C  | -3.036547 | 4.057903  | 1.126169  | C     | -0.369387 | 1.697033  | -2.540865 |
| H  | -2.985266 | 4.462880  | 2.138360  | C     | 3.597672  | -1.281892 | 1.285148  |
| C  | -2.602992 | 4.839954  | 0.056076  | C     | 2.808118  | -2.026396 | 2.188014  |
| C  | -2.680598 | 4.300170  | -1.231706 | C     | 3.098417  | -1.952916 | 3.548984  |
| H  | -2.364922 | 4.903452  | -2.084477 | H     | 2.483016  | -2.520395 | 4.249126  |
| C  | -3.175900 | 3.018346  | -1.462814 | C     | 4.168094  | -1.194931 | 4.035098  |
| C  | -3.873408 | 1.943355  | 2.154321  | C     | 4.956864  | -0.502441 | 3.116580  |
| H  | -4.480806 | 2.523288  | 2.859517  | H     | 5.799880  | 0.089682  | 3.476948  |
| H  | -2.964017 | 1.644059  | 2.697400  | C     | 4.691110  | -0.526296 | 1.745956  |
| H  | -4.422102 | 1.027317  | 1.908824  | C     | 1.716446  | -2.934141 | 1.705334  |
| C  | -2.046524 | 6.211806  | 0.279158  | H     | 2.108499  | -3.940245 | 1.495892  |
| H  | -0.949317 | 6.186776  | 0.335800  | H     | 1.250497  | -2.590108 | 0.776733  |
| H  | -2.406370 | 6.647959  | 1.217686  | H     | 0.928528  | -3.048119 | 2.458540  |
| H  | -2.304430 | 6.893392  | -0.539755 | C     | 4.443779  | -1.112674 | 5.504313  |
| C  | -3.342895 | 2.523350  | -2.868835 | H     | 5.484700  | -0.836960 | 5.706847  |
| H  | -3.203058 | 1.440982  | -2.962612 | H     | 4.232780  | -2.061224 | 6.011744  |
| H  | -2.639706 | 3.016028  | -3.549282 | H     | 3.810446  | -0.351734 | 5.981391  |
| H  | -4.355554 | 2.738591  | -3.239494 | C     | 5.533116  | 0.307214  | 0.826446  |
| C  | -0.924524 | 0.040798  | -2.059056 | H     | 6.599184  | 0.202220  | 1.060903  |
| O  | -0.673780 | 0.336478  | -3.149848 | H     | 5.290976  | 1.373325  | 0.943919  |
| Mg | 3.194711  | 0.722006  | 0.696881  | H     | 5.394110  | 0.056227  | -0.230855 |
| S  | 3.320793  | 0.954828  | -1.945567 | C     | -0.849642 | 2.911590  | -1.835996 |
| O  | 2.688125  | 0.340629  | -3.097704 | C     | -2.080256 | 2.870626  | -1.150605 |
| O  | 4.127235  | 0.057180  | -1.042448 | C     | -2.545338 | 4.028303  | -0.533848 |
| O  | 2.468831  | 1.787716  | -1.034027 | H     | -3.482869 | 3.988022  | 0.024105  |
| C  | 4.567117  | 2.142808  | -2.609267 | C     | -1.835210 | 5.232335  | -0.604151 |
| F  | 5.455580  | 1.489243  | -3.354012 | C     | -0.647680 | 5.258712  | -1.335688 |
| F  | 5.196051  | 2.744640  | -1.598370 | H     | -0.096001 | 6.196170  | -1.423295 |
| F  | 3.950713  | 3.058889  | -3.352370 | C     | -0.141223 | 4.119686  | -1.967691 |

C -2.860221 1.596311 -1.079344  
 H -3.180386 1.256144 -2.074221  
 H -3.755473 1.707961 -0.462383  
 H -2.260143 0.779762 -0.660026  
 C -2.330972 6.453426 0.105623  
 H -3.418865 6.560271 0.019147  
 H -1.863581 7.365850 -0.280739  
 H -2.105131 6.402167 1.179950  
 C 1.094185 4.225490 -2.811957  
 H 1.608603 3.267352 -2.938624  
 H 1.807298 4.943127 -2.389344  
 H 0.841899 4.584664 -3.820013  
 C 0.028914 -0.083658 0.629074  
 O -0.807720 -0.768034 1.099361  
 Mg -2.487903 -2.059438 0.885351  
 S -4.204581 -0.558169 2.260364  
 O -5.531187 -0.646193 2.839305  
 O -4.078508 -0.700230 0.767852  
 O -3.130653 -1.444615 2.824995  
 C -3.628760 1.165419 2.614447  
 F -4.488043 2.030176 2.077015  
 F -2.416907 1.374097 2.098077  
 F -3.581804 1.344550 3.931332  
 S -1.206091 -3.163766 -1.182348  
 O -1.308100 -3.644620 0.243124  
 O 0.117200 -3.165188 -1.779952  
 O -2.010882 -1.900690 -1.239716  
 C -2.204311 -4.395210 -2.127584  
 F -1.666799 -5.603762 -1.985549  
 F -2.217717 -4.059816 -3.414847  
 F -3.453028 -4.408250 -1.659818  
 N 2.836067 2.069499 -0.743293  
 C 3.714557 2.689961 -1.177832  
 C 4.797306 3.457066 -1.727988  
 H 5.746672 2.938600 -1.556865  
 H 4.649898 3.587607 -2.805264  
 H 4.836780 4.441935 -1.251610

A0-C1

Mn -2.198977 1.069000 -0.128094  
 O -4.833176 1.093275 1.204309  
 O -2.317941 3.416110 1.659750  
 N -0.247464 1.139094 -1.004602  
 N -2.168486 -0.731418 -1.278080  
 C -3.839445 0.960228 0.617153  
 C -2.140684 2.539234 0.918381  
 C 0.684798 2.112721 -0.856211  
 C 1.884831 2.090373 -1.572917  
 H 2.599168 2.896190 -1.422771  
 C 2.133139 1.068788 -2.477791  
 H 3.046439 1.050535 -3.068692  
 C 1.194445 0.053956 -2.601741  
 H 1.371293 -0.755246 -3.302067  
 C 0.011309 0.112040 -1.856112  
 C -1.009631 -0.939451 -1.957478  
 C -0.785730 -2.097428 -2.702403  
 H 0.151380 -2.250669 -3.225683  
 C -1.768578 -3.072024 -2.760918  
 H -1.609839 -3.982713 -3.333085  
 C -2.952080 -2.854973 -2.077548  
 H -3.758011 -3.584610 -2.097949  
 C -3.134562 -1.676970 -1.346777  
 C 0.478999 3.235398 0.092964  
 C 0.942501 3.098149 1.417913  
 C 0.820119 4.181899 2.283404  
 H 1.165454 4.074565 3.312960  
 C 0.272123 5.399598 1.866055

C -0.140919 5.518871 0.539163  
 H -0.559497 6.465513 0.193514  
 C -0.039885 4.458440 -0.364559  
 C 1.581683 1.822634 1.876364  
 H 2.602670 1.721457 1.476896  
 H 1.022871 0.940665 1.544892  
 H 1.658022 1.782546 2.968691  
 C 0.112332 6.533790 2.830126  
 H -0.003052 7.493160 2.313887  
 H 0.966811 6.610077 3.513004  
 H -0.779393 6.393916 3.457028  
 C -0.461586 4.651251 -1.790616  
 H -1.355520 5.282145 -1.859506  
 H -0.674812 3.706649 -2.302080  
 H 0.327007 5.153471 -2.368732  
 C -4.441730 -1.491243 -0.667431  
 C -4.674885 -2.112708 0.574856  
 C -5.937017 -1.990390 1.155188  
 H -6.116614 -2.456067 2.125718  
 C -6.972816 -1.292364 0.528982  
 C -6.725248 -0.721821 -0.721216  
 H -7.527352 -0.187465 -1.233119  
 C -5.478013 -0.814915 -1.339276  
 C -3.609293 -2.918828 1.256138  
 H -3.624155 -3.963808 0.913444  
 H -3.758709 -2.936303 2.342001  
 H -2.601811 -2.540988 1.054072  
 C -8.305120 -1.137458 1.194322  
 H -8.549008 -2.001630 1.822956  
 H -9.111146 -1.003636 0.463966  
 H -8.317204 -0.254816 1.849216  
 C -5.278706 -0.242216 -2.710943  
 H -4.242638 0.057634 -2.901004  
 H -5.920029 0.630882 -2.875898  
 H -5.536196 -0.980503 -3.484075  
 C -2.866776 2.024295 -1.493373  
 O -3.316130 2.653670 -2.360195  
 Mg 3.087866 -0.991648 -0.284866

S 1.319133 -2.782663 0.538606  
 O -0.088131 -3.131322 0.524884  
 O 1.715846 -1.491925 1.211836  
 O 2.068193 -2.781322 -0.766542  
 C 2.178816 -4.062672 1.555236  
 F 1.693787 -4.032872 2.793016  
 F 3.485450 -3.790505 1.582546  
 F 1.985075 -5.263294 1.022591  
 S 5.717260 -0.723706 -0.104993  
 O 4.943112 -1.392853 -1.210107  
 O 6.905549 -1.386256 0.391616  
 O 4.671010 -0.304910 0.896136  
 C 6.273177 0.871577 -0.850660  
 F 7.120621 0.626107 -1.844113  
 F 6.869916 1.611537 0.077934  
 F 5.210638 1.527277 -1.324797  
 N -1.421924 -0.065995 1.379951  
 C -1.074122 -0.684535 2.298664  
 C -0.650160 -1.456905 3.434967  
 H -0.786568 -2.525236 3.234305  
 H -1.246995 -1.184148 4.311643  
 H 0.406507 -1.264664 3.648983

A0-C3

Mn -2.779719 0.713119 -0.131173  
 O -4.640579 1.818535 -2.146793  
 O -0.983935 2.239457 -1.914221  
 N -1.475929 0.171729 1.460580  
 N -4.095688 -0.145156 1.300304

|    |           |           |           |       |           |           |           |
|----|-----------|-----------|-----------|-------|-----------|-----------|-----------|
| C  | -3.991288 | 1.331305  | -1.317527 | F     | 6.152230  | -2.272736 | 1.346452  |
| C  | -1.614781 | 1.611358  | -1.167770 | F     | 5.988825  | -4.211205 | 0.377368  |
| C  | -0.125336 | 0.170560  | 1.460810  | S     | 6.121533  | 1.342174  | -0.623142 |
| C  | 0.607346  | 0.168338  | 2.647888  | O     | 5.247898  | 0.905799  | -1.764074 |
| H  | 1.693795  | 0.176100  | 2.598658  | O     | 7.556769  | 1.190390  | -0.760854 |
| C  | -0.061175 | 0.144061  | 3.863226  | O     | 5.473133  | 0.773097  | 0.612486  |
| H  | 0.489381  | 0.151582  | 4.800551  | C     | 5.795968  | 3.152234  | -0.486137 |
| C  | -1.445824 | 0.074839  | 3.862432  | F     | 6.223081  | 3.768082  | -1.584767 |
| H  | -1.987089 | 0.012782  | 4.800667  | F     | 6.427731  | 3.642777  | 0.576570  |
| C  | -2.130086 | 0.077462  | 2.647140  | F     | 4.482260  | 3.350889  | -0.349511 |
| C  | -3.584953 | -0.096189 | 2.558577  | N     | -3.056538 | 2.415349  | 0.998316  |
| C  | -4.387285 | -0.272517 | 3.684196  | C     | -3.412762 | 4.619659  | 2.325759  |
| H  | -3.962844 | -0.214920 | 4.681087  | H     | -3.549671 | 4.393135  | 3.388011  |
| C  | -5.739719 | -0.532533 | 3.517293  | H     | -2.541849 | 5.272479  | 2.209470  |
| H  | -6.385192 | -0.665635 | 4.382041  | H     | -4.301139 | 5.140826  | 1.954841  |
| C  | -6.241547 | -0.656216 | 2.231196  | C     | -3.215609 | 3.402712  | 1.587828  |
| H  | -7.283382 | -0.911210 | 2.053768  |       |           |           |           |
| C  | -5.397332 | -0.470660 | 1.133383  | A0-C4 |           |           |           |
| C  | 0.595163  | 0.099007  | 0.166700  | Mn    | 2.740655  | 0.088723  | -0.201361 |
| C  | 1.330848  | 1.203498  | -0.291429 | O     | 4.453211  | 1.206481  | -2.332975 |
| C  | 2.047635  | 1.082042  | -1.497511 | O     | 1.019687  | 0.780415  | -2.495901 |
| H  | 2.569572  | 1.955878  | -1.891942 | N     | 1.417630  | -0.819021 | 1.208897  |
| C  | 2.014337  | -0.101384 | -2.260974 | N     | 4.077616  | -0.431516 | 1.380041  |
| C  | 1.306235  | -1.197087 | -1.746502 | C     | 3.903507  | 0.753959  | -1.415406 |
| H  | 1.311187  | -2.138079 | -2.297596 | C     | 1.593087  | 0.455121  | -1.537516 |
| C  | 0.607106  | -1.123566 | -0.540141 | C     | 0.083080  | -1.004716 | 1.086495  |
| C  | 1.330785  | 2.504630  | 0.451080  | C     | -0.656838 | -1.704378 | 2.039872  |
| H  | 2.032305  | 2.488452  | 1.296248  | H     | -1.726052 | -1.829810 | 1.884568  |
| H  | 0.340592  | 2.729633  | 0.866661  | C     | -0.021122 | -2.221852 | 3.156726  |
| H  | 1.623172  | 3.330939  | -0.204362 | H     | -0.576457 | -2.772171 | 3.912025  |
| C  | 2.717216  | -0.195451 | -3.579368 | C     | 1.340908  | -2.016041 | 3.295505  |
| H  | 3.373876  | -1.073101 | -3.625674 | H     | 1.856820  | -2.409028 | 4.163988  |
| H  | 3.313688  | 0.697504  | -3.788614 | C     | 2.038091  | -1.309601 | 2.313845  |
| H  | 1.985556  | -0.309105 | -4.389136 | C     | 3.481515  | -1.061187 | 2.426899  |
| C  | -0.018693 | -2.354352 | 0.038487  | C     | 4.199808  | -1.451328 | 3.557611  |
| H  | -0.071640 | -3.158935 | -0.700794 | H     | 3.703738  | -1.941220 | 4.387819  |
| H  | -1.026060 | -2.180306 | 0.432423  | C     | 5.560867  | -1.202217 | 3.622831  |
| H  | 0.587296  | -2.714730 | 0.881363  | H     | 6.134226  | -1.494963 | 4.498989  |
| C  | -5.920508 | -0.705029 | -0.232698 | C     | 6.169438  | -0.577024 | 2.547966  |
| C  | -6.834208 | 0.195640  | -0.806029 | H     | 7.236205  | -0.367296 | 2.545595  |
| C  | -7.335501 | -0.077898 | -2.079794 | C     | 5.410741  | -0.201209 | 1.436804  |
| H  | -8.026167 | 0.632659  | -2.536268 | C     | -0.659484 | -0.441936 | -0.071403 |
| C  | -6.959767 | -1.219096 | -2.790168 | C     | -0.970791 | -1.274908 | -1.167639 |
| C  | -6.073785 | -2.115021 | -2.182637 | C     | -1.719694 | -0.754318 | -2.221842 |
| H  | -5.789918 | -3.027534 | -2.709624 | H     | -1.947451 | -1.392503 | -3.075953 |
| C  | -5.558624 | -1.890440 | -0.906428 | C     | -2.166432 | 0.574665  | -2.224810 |
| C  | -7.231772 | 1.453434  | -0.092917 | C     | -1.906894 | 1.362014  | -1.086949 |
| H  | -7.723587 | 2.153502  | -0.776828 | H     | -2.231888 | 2.404488  | -1.074437 |
| H  | -6.367161 | 1.966785  | 0.349971  | C     | -1.152722 | 0.871074  | -0.001537 |
| H  | -7.931083 | 1.254212  | 0.730733  | C     | -0.525132 | -2.701428 | -1.187687 |
| C  | -7.483599 | -1.480674 | -4.168399 | H     | -1.094354 | -3.299264 | -0.462496 |
| H  | -8.312246 | -0.810105 | -4.420394 | H     | 0.531874  | -2.798047 | -0.911647 |
| H  | -7.835188 | -2.514006 | -4.277458 | H     | -0.670951 | -3.151040 | -2.174725 |
| H  | -6.701306 | -1.336067 | -4.925768 | C     | -2.885725 | 1.137979  | -3.410526 |
| C  | -4.716127 | -2.941007 | -0.243553 | H     | -3.336733 | 2.111132  | -3.192598 |
| H  | -3.844256 | -2.531918 | 0.280455  | H     | -3.667302 | 0.459341  | -3.772657 |
| H  | -4.356222 | -3.675401 | -0.971492 | H     | -2.180712 | 1.278083  | -4.240382 |
| H  | -5.301992 | -3.484453 | 0.511658  | C     | -0.952758 | 1.729826  | 1.209379  |
| C  | -2.544544 | -0.731940 | -1.175304 | H     | -0.932830 | 2.792280  | 0.946205  |
| O  | -2.388444 | -1.581469 | -1.951986 | H     | -0.032511 | 1.487882  | 1.749479  |
| Mg | 3.915715  | -0.109075 | -0.450145 | H     | -1.780109 | 1.587048  | 1.919503  |
| S  | 3.887700  | -2.691239 | 0.107566  | C     | 6.124573  | 0.445634  | 0.307447  |
| O  | 3.044655  | -3.849258 | -0.122177 | C     | 6.741068  | -0.362692 | -0.667368 |
| O  | 3.324065  | -1.569967 | 0.941112  | C     | 7.469201  | 0.256467  | -1.683310 |
| O  | 4.504498  | -2.021354 | -1.089284 | H     | 7.934748  | -0.364497 | -2.450582 |
| C  | 5.335794  | -3.291046 | 1.082580  | C     | 7.615864  | 1.644030  | -1.745098 |
| F  | 4.908675  | -3.823618 | 2.224977  | C     | 7.029063  | 2.417768  | -0.740912 |

H 7.148820 3.502251 -0.763289  
 C 6.292189 1.843438 0.294738  
 C 6.658736 -1.859816 -0.612893  
 H 7.517148 -2.280472 -0.069594  
 H 6.674120 -2.295996 -1.618652  
 H 5.758669 -2.216728 -0.100772  
 C 8.358015 2.287575 -2.874952  
 H 9.125243 1.623028 -3.288267  
 H 8.840274 3.221978 -2.565801  
 H 7.676007 2.539393 -3.699352  
 C 5.735775 2.707084 1.387143  
 H 4.855517 2.268539 1.869094  
 H 5.458403 3.698395 1.011149  
 H 6.481658 2.862355 2.179937  
 C 2.476963 1.728060 0.482806  
 O 2.305208 2.800112 0.894758  
 Mg -4.011873 0.342205 -0.396028  
 S -5.803379 2.173770 0.255023  
 O -7.234763 2.403292 0.247138  
 O -5.101161 2.030243 -1.066334  
 O -5.279749 1.045499 1.104670  
 C -5.038729 3.679692 1.000082  
 F -5.473438 3.829472 2.248095  
 F -5.367782 4.747995 0.279610  
 F -3.710046 3.544292 1.008737  
 S -4.537528 -2.216192 -0.784021  
 O -3.747715 -1.601006 0.342128  
 O -3.960611 -3.360425 -1.463686  
 O -4.997493 -1.055016 -1.621653  
 C -6.076273 -2.820400 0.037679  
 F -5.754588 -3.717624 0.966409  
 F -6.869481 -3.382934 -0.870090  
 F -6.709882 -1.797842 0.609129  
 N 3.067702 -1.809027 -0.871313  
 C 3.300159 -2.874692 -1.268243  
 C 3.596041 -4.195296 -1.751135  
 H 4.176366 -4.744166 -1.002067  
 H 2.666580 -4.738809 -1.951752  
 H 4.178402 -4.132094 -2.676121

A0-Z2

Mn 2.767335 -0.591106 -0.224504  
 O 4.630662 -1.432067 -2.360865  
 O 0.993517 -1.719188 -2.300766  
 N 1.434795 -0.255637 1.401915  
 N 4.075745 -0.026589 1.353279  
 C 3.986404 -1.057876 -1.471181  
 C 1.610067 -1.254462 -1.432316  
 C 0.084737 -0.217085 1.372214  
 C -0.678314 -0.348983 2.532151  
 H -1.762851 -0.316626 2.459239  
 C -0.042862 -0.512898 3.754051  
 H -0.618104 -0.631238 4.668824  
 C 1.342390 -0.493548 3.792906  
 H 1.858228 -0.585549 4.742675  
 C 2.058836 -0.348301 2.605012  
 C 3.520641 -0.219908 2.578687  
 C 4.289828 -0.228245 3.740849  
 H 3.829710 -0.394106 4.709112  
 C 5.656797 -0.012172 3.650544  
 H 6.275956 -0.022381 4.544212  
 C 6.208567 0.250989 2.406906  
 H 7.266735 0.473593 2.294094  
 C 5.396442 0.252070 1.269934  
 C -0.605443 0.025135 0.081304  
 C -1.310744 -1.019691 -0.541196  
 C -2.009571 -0.744616 -1.731878

H -2.507802 -1.565240 -2.251703  
 C -1.988168 0.533609 -2.323899  
 C -1.299605 1.554667 -1.658198  
 H -1.310202 2.561527 -2.076004  
 C -0.621076 1.329203 -0.457759  
 C -1.294244 -2.411481 0.014064  
 H -1.989588 -2.520521 0.857298  
 H -0.298036 -2.680414 0.387716  
 H -1.581443 -3.140656 -0.749362  
 C -2.680850 0.790591 -3.623656  
 H -3.094016 1.803820 -3.665954  
 H -3.486325 0.071558 -3.807062  
 H -1.968928 0.696617 -4.454357  
 C -0.028440 2.481624 0.290694  
 H 0.950391 2.253913 0.727443  
 H -0.688002 2.754561 1.126628  
 H 0.074300 3.361675 -0.351057  
 C 5.987757 0.629403 -0.035362  
 C 6.869697 -0.248269 -0.689322  
 C 7.446709 0.155744 -1.893882  
 H 8.113600 -0.533219 -2.414431  
 C 7.174681 1.402772 -2.459656  
 C 6.318500 2.268927 -1.772080  
 H 6.117258 3.260038 -2.182063  
 C 5.733317 1.915026 -0.556270  
 C 7.150590 -1.614067 -0.137559  
 H 7.813004 -1.575319 0.738133  
 H 7.636335 -2.248063 -0.887155  
 H 6.232264 -2.121354 0.189330  
 C 7.773673 1.803227 -3.772276  
 H 8.617013 1.159651 -4.045379  
 H 8.125639 2.841766 -3.756521  
 H 7.035324 1.735314 -4.582926  
 C 4.937803 2.927686 0.214670  
 H 4.041757 2.509616 0.687990  
 H 4.624043 3.757107 -0.427453  
 H 5.544718 3.352831 1.027062  
 C 2.611928 1.017260 -1.012825  
 O 2.502725 1.994168 -1.631633  
 Mg -3.846734 0.108181 -0.423365

S -6.001846 -1.423790 -0.590211  
 O -7.445069 -1.286416 -0.632589  
 O -5.293178 -0.935009 0.647294  
 O -5.204108 -0.888199 -1.742462  
 C -5.655426 -3.235543 -0.613717  
 F -6.225854 -3.815214 0.439079  
 F -4.336590 -3.436558 -0.568484  
 F -6.142338 -3.764207 -1.733292  
 S -4.036523 2.672261 0.218915  
 O -4.598542 1.997891 -1.000571  
 O -3.287262 3.901411 0.036059  
 O -3.385765 1.571913 1.015086  
 C -5.524239 3.118889 1.214725  
 F -6.252289 4.009380 0.545580  
 F -5.134436 3.642419 2.374853  
 F -6.257575 2.030348 1.443626  
 N 2.944270 -2.462317 0.619092  
 C 3.167477 -4.870901 1.566140  
 H 2.238981 -5.425594 1.396547  
 H 3.990806 -5.393513 1.068883  
 H 3.368605 -4.830507 2.641361  
 C 3.044843 -3.539627 1.039836

A1-C1

Mn -2.193452 1.055145 -0.172352  
 O -4.876256 1.323479 1.031899  
 O -2.263219 3.548843 1.406157

|    |           |           |           |       |           |           |           |
|----|-----------|-----------|-----------|-------|-----------|-----------|-----------|
| N  | -0.210883 | 0.956253  | -0.903174 | C     | 2.338798  | -3.640587 | 1.637356  |
| N  | -2.238366 | -0.807151 | -1.204022 | F     | 1.907498  | -3.526111 | 2.891967  |
| C  | -3.865549 | 1.086605  | 0.504725  | F     | 3.599817  | -3.198182 | 1.563317  |
| C  | -2.099145 | 2.595959  | 0.757486  | F     | 2.299615  | -4.917213 | 1.267260  |
| C  | 0.830624  | 1.776788  | -0.671743 | S     | 5.459848  | -0.804648 | -0.087454 |
| C  | 2.095359  | 1.585463  | -1.252360 | O     | 4.717822  | -1.401008 | -1.248548 |
| H  | 2.886789  | 2.299343  | -1.038601 | O     | 6.457295  | -1.623732 | 0.575370  |
| C  | 2.221604  | 0.644998  | -2.325864 | O     | 4.407730  | -0.154794 | 0.767114  |
| H  | 3.113211  | 0.626767  | -2.951605 | C     | 6.370251  | 0.617350  | -0.830611 |
| C  | 1.157869  | -0.200868 | -2.569726 | F     | 7.273542  | 0.163508  | -1.696647 |
| H  | 1.223800  | -0.924737 | -3.377248 | F     | 6.980421  | 1.312254  | 0.126488  |
| C  | -0.018571 | -0.122259 | -1.785328 | F     | 5.509317  | 1.412238  | -1.470876 |
| C  | -1.072744 | -1.078941 | -1.888082 | N     | -1.523665 | -0.021071 | 1.449837  |
| C  | -0.931051 | -2.271715 | -2.633660 | C     | -1.160641 | -0.629479 | 2.369096  |
| H  | 0.003942  | -2.482301 | -3.143407 | C     | -0.706893 | -1.394313 | 3.500300  |
| C  | -1.958954 | -3.181430 | -2.680773 | H     | -0.815415 | -2.464801 | 3.294695  |
| H  | -1.853636 | -4.106117 | -3.244422 | H     | -1.299921 | -1.142802 | 4.385721  |
| C  | -3.137622 | -2.900622 | -1.979962 | H     | 0.346867  | -1.175471 | 3.704668  |
| H  | -3.978888 | -3.589378 | -1.985811 |       |           |           |           |
| C  | -3.246244 | -1.712875 | -1.263465 | A1-C2 |           |           |           |
| C  | 0.657958  | 3.012771  | 0.138375  | Mn    | 2.000912  | 0.807558  | 0.013314  |
| C  | 0.995424  | 3.041092  | 1.503295  | O     | 4.132874  | 0.071833  | -1.892210 |
| C  | 0.880872  | 4.246202  | 2.197367  | O     | 2.679589  | 3.203541  | -1.570918 |
| H  | 1.128799  | 4.265974  | 3.260109  | N     | 0.359207  | 1.425024  | 1.194666  |
| C  | 0.458115  | 5.421109  | 1.571820  | N     | 1.576938  | -0.991042 | 1.057043  |
| C  | 0.165311  | 5.373226  | 0.207114  | C     | 3.299388  | 0.225539  | -1.093276 |
| H  | -0.152733 | 6.283789  | -0.303964 | C     | 2.303546  | 2.334116  | -0.892397 |
| C  | 0.266540  | 4.191239  | -0.526781 | C     | -0.262791 | 2.620565  | 1.228411  |
| C  | 1.494555  | 1.812252  | 2.198811  | C     | -1.470422 | 2.834251  | 1.903749  |
| H  | 2.567968  | 1.655810  | 2.015811  | H     | -1.928342 | 3.818754  | 1.870793  |
| H  | 0.983410  | 0.910247  | 1.849508  | C     | -2.036474 | 1.787599  | 2.645311  |
| H  | 1.360909  | 1.885246  | 3.284554  | H     | -2.961911 | 1.933104  | 3.200110  |
| C  | 0.295437  | 6.690899  | 2.349013  | C     | -1.380986 | 0.570652  | 2.690174  |
| H  | 0.484088  | 7.574932  | 1.728914  | H     | -1.734629 | -0.207745 | 3.370656  |
| H  | 0.967662  | 6.727487  | 3.213966  | C     | -0.159367 | 0.382018  | 1.968422  |
| H  | -0.728594 | 6.787771  | 2.736657  | C     | 0.572652  | -0.835931 | 1.998672  |
| C  | -0.003146 | 4.203621  | -2.002844 | C     | 0.274882  | -1.875450 | 2.914943  |
| H  | -0.737285 | 4.973630  | -2.266553 | H     | -0.461382 | -1.710498 | 3.697576  |
| H  | -0.373317 | 3.241878  | -2.374909 | C     | 0.921605  | -3.081721 | 2.823104  |
| H  | 0.913197  | 4.426788  | -2.568270 | H     | 0.693380  | -3.886880 | 3.519409  |
| C  | -4.539456 | -1.452579 | -0.577717 | C     | 1.875991  | -3.260053 | 1.808084  |
| C  | -4.776902 | -1.983293 | 0.704179  | H     | 2.387813  | -4.209507 | 1.670261  |
| C  | -6.027938 | -1.785745 | 1.290832  | C     | 2.187473  | -2.197205 | 0.966480  |
| H  | -6.209600 | -2.184689 | 2.290617  | C     | 0.384440  | 3.814386  | 0.619868  |
| C  | -7.051866 | -1.101588 | 0.632012  | C     | -0.060557 | 4.334559  | -0.610351 |
| C  | -6.803053 | -0.620037 | -0.655201 | C     | 0.516234  | 5.508548  | -1.092069 |
| H  | -7.595319 | -0.094004 | -1.191148 | H     | 0.178133  | 5.903992  | -2.051626 |
| C  | -5.564918 | -0.786330 | -1.275656 | C     | 1.522646  | 6.179732  | -0.392249 |
| C  | -3.734126 | -2.788664 | 1.421892  | C     | 1.932107  | 5.655378  | 0.834297  |
| H  | -3.846205 | -3.860667 | 1.203053  | H     | 2.700241  | 6.176216  | 1.408911  |
| H  | -3.822251 | -2.675892 | 2.509258  | C     | 1.369741  | 4.491371  | 1.364412  |
| H  | -2.715721 | -2.514417 | 1.128298  | C     | -1.103671 | 3.621646  | -1.414696 |
| C  | -8.371914 | -0.865848 | 1.299221  | H     | -2.044358 | 3.505143  | -0.862578 |
| H  | -8.615080 | -1.661586 | 2.012864  | H     | -0.781356 | 2.604657  | -1.678466 |
| H  | -9.188754 | -0.794726 | 0.571700  | H     | -1.319328 | 4.158875  | -2.345001 |
| H  | -8.366159 | 0.077133  | 1.864095  | C     | 2.156714  | 7.414676  | -0.954679 |
| C  | -5.355843 | -0.285206 | -2.674214 | H     | 2.641939  | 8.013004  | -0.175240 |
| H  | -4.311215 | -0.024969 | -2.876119 | H     | 1.424970  | 8.049333  | -1.468740 |
| H  | -5.971314 | 0.598916  | -2.877338 | H     | 2.929023  | 7.162514  | -1.694826 |
| H  | -5.636522 | -1.048233 | -3.414638 | C     | 1.764269  | 4.037343  | 2.739303  |
| C  | -2.729409 | 1.926624  | -1.635518 | H     | 2.766684  | 4.392244  | 3.003407  |
| O  | -3.088165 | 2.501334  | -2.582001 | H     | 1.749840  | 2.948121  | 2.850213  |
| Mg | 2.830293  | -0.721755 | -0.521695 | H     | 1.071094  | 4.437315  | 3.493662  |
| S  | 1.283076  | -2.624108 | 0.517129  | C     | 3.218015  | -2.440682 | -0.077664 |
| O  | -0.062368 | -3.156923 | 0.628043  | C     | 2.826157  | -2.936473 | -1.336717 |
| O  | 1.522808  | -1.224942 | 1.021353  | C     | 3.814123  | -3.226177 | -2.279509 |
| O  | 1.992529  | -2.700500 | -0.799206 | H     | 3.512724  | -3.600317 | -3.259914 |

|       |           |           |           |       |           |           |           |
|-------|-----------|-----------|-----------|-------|-----------|-----------|-----------|
| C     | 5.172626  | -3.059673 | -2.000979 | C     | 1.154881  | 0.734229  | -0.129650 |
| C     | 5.535316  | -2.602595 | -0.732220 | C     | 1.908961  | 1.127308  | -1.254601 |
| H     | 6.592845  | -2.476608 | -0.491890 | H     | 2.234592  | 2.167500  | -1.334107 |
| C     | 4.581338  | -2.293841 | 0.238047  | C     | 2.144823  | 0.248723  | -2.330738 |
| C     | 1.384155  | -3.204619 | -1.658670 | C     | 1.675120  | -1.064699 | -2.219332 |
| H     | 1.103601  | -4.232072 | -1.382253 | H     | 1.882951  | -1.771893 | -3.023056 |
| H     | 1.192656  | -3.103964 | -2.734263 | C     | 0.936894  | -1.492082 | -1.112993 |
| H     | 0.701467  | -2.537333 | -1.122630 | C     | 0.926900  | 1.704104  | 0.990541  |
| C     | 6.211574  | -3.336116 | -3.044167 | H     | 1.734510  | 1.648067  | 1.733941  |
| H     | 5.867532  | -4.077569 | -3.774476 | H     | -0.005708 | 1.493771  | 1.522726  |
| H     | 7.146990  | -3.698047 | -2.601499 | H     | 0.895162  | 2.735999  | 0.623037  |
| H     | 6.459420  | -2.424882 | -3.606859 | C     | 2.856079  | 0.712321  | -3.563311 |
| C     | 5.019338  | -1.836297 | 1.598165  | H     | 3.526405  | -0.058175 | -3.960339 |
| H     | 4.257762  | -1.231432 | 2.101820  | H     | 3.434083  | 1.625388  | -3.385660 |
| H     | 5.940927  | -1.244679 | 1.542925  | H     | 2.126195  | 0.939139  | -4.352067 |
| H     | 5.228389  | -2.691457 | 2.257053  | C     | 0.517785  | -2.923819 | -1.007635 |
| C     | 3.208000  | 1.263508  | 1.243391  | H     | 0.400879  | -3.379673 | -1.996830 |
| O     | 4.017812  | 1.558397  | 2.026911  | H     | -0.417888 | -3.046136 | -0.452738 |
| Mg    | -2.737168 | -0.637219 | 1.055111  | H     | 1.283770  | -3.502175 | -0.471771 |
| S     | -2.514190 | -2.990793 | -0.197481 | C     | -6.190362 | -0.003136 | 0.090511  |
| O     | -2.585143 | -3.511316 | -1.552865 | C     | -6.542164 | 1.357504  | 0.023727  |
| O     | -3.761241 | -2.412762 | 0.404148  | C     | -7.294522 | 1.806130  | -1.063582 |
| O     | -1.428718 | -1.996069 | 0.099665  | H     | -7.558700 | 2.863900  | -1.121732 |
| C     | -2.108775 | -4.435144 | 0.877690  | C     | -7.710496 | 0.942389  | -2.078046 |
| F     | -2.990769 | -5.409472 | 0.665574  | C     | -7.370861 | -0.409176 | -1.975436 |
| F     | -2.157792 | -4.071475 | 2.160364  | H     | -7.700807 | -1.103078 | -2.751041 |
| F     | -0.884710 | -4.871024 | 0.588188  | C     | -6.625872 | -0.900673 | -0.903371 |
| S     | -4.060515 | 1.272663  | -0.230416 | C     | -6.144503 | 2.323492  | 1.101523  |
| O     | -2.659906 | 0.782506  | -0.477082 | H     | -6.954367 | 2.459957  | 1.832673  |
| O     | -4.289979 | 2.705792  | -0.185730 | H     | -5.923608 | 3.314316  | 0.685382  |
| O     | -4.582039 | 0.450619  | 0.911366  | H     | -5.266107 | 1.986285  | 1.662014  |
| C     | -4.973485 | 0.669168  | -1.716870 | C     | -8.475348 | 1.454042  | -3.260091 |
| F     | -4.563686 | 1.356246  | -2.784295 | H     | -9.032936 | 2.366628  | -3.019783 |
| F     | -6.281194 | 0.849446  | -1.548707 | H     | -9.183913 | 0.708888  | -3.640533 |
| F     | -4.724706 | -0.626227 | -1.911150 | H     | -7.800358 | 1.701646  | -4.091627 |
| N     | 0.554459  | 0.210438  | -1.338501 | C     | -6.343116 | -2.370380 | -0.799188 |
| C     | -0.250176 | -0.120424 | -2.106783 | H     | -5.410587 | -2.581800 | -0.265109 |
| C     | -1.243724 | -0.542292 | -3.058122 | H     | -6.281450 | -2.836799 | -1.789332 |
| H     | -1.736499 | -1.455597 | -2.704101 | H     | -7.143194 | -2.887863 | -0.250149 |
| H     | -1.995729 | 0.242540  | -3.191384 | C     | -2.881443 | -1.725292 | -1.032449 |
| H     | -0.771356 | -0.750356 | -4.024040 | O     | -2.952677 | -2.763445 | -1.557273 |
| A1-C3 |           |           |           | Mg    | 3.956053  | 0.242103  | -0.413625 |
| Mn    | -2.760222 | -0.129901 | -0.262734 | S     | 4.590372  | -2.306667 | -0.720069 |
| O     | -4.434384 | 1.059027  | -2.386277 | O     | 4.083026  | -3.487876 | -1.392627 |
| O     | -1.002649 | 0.829937  | -2.431286 | O     | 3.739042  | -1.698083 | 0.362430  |
| N     | -1.431011 | -0.870146 | 1.200535  | O     | 5.039387  | -1.149495 | -1.567919 |
| N     | -4.114392 | -0.639728 | 1.271008  | C     | 6.122180  | -2.832050 | 0.165166  |
| C     | -3.901483 | 0.580795  | -1.466265 | F     | 5.830374  | -3.823486 | 1.003847  |
| C     | -1.585555 | 0.419617  | -1.506619 | F     | 6.617853  | -1.803052 | 0.851324  |
| C     | -0.082848 | -1.026858 | 1.132832  | F     | 7.024023  | -3.248327 | -0.720659 |
| C     | 0.675020  | -1.564806 | 2.159495  | S     | 5.726656  | 2.139217  | 0.123325  |
| H     | 1.751358  | -1.651747 | 2.032119  | O     | 5.055551  | 1.900215  | -1.197341 |
| C     | 0.031957  | -1.984329 | 3.342325  | O     | 7.159211  | 2.364446  | 0.134318  |
| H     | 0.601364  | -2.415083 | 4.163149  | O     | 5.181764  | 1.079892  | 1.046411  |
| C     | -1.328182 | -1.840908 | 3.432784  | C     | 4.952556  | 3.696962  | 0.737771  |
| H     | -1.843441 | -2.165365 | 4.332086  | F     | 5.302253  | 4.709187  | -0.051454 |
| C     | -2.073154 | -1.283409 | 2.364741  | F     | 5.358863  | 3.939023  | 1.981166  |
| C     | -3.490990 | -1.140909 | 2.409166  | F     | 3.623618  | 3.566548  | 0.724785  |
| C     | -4.256112 | -1.501481 | 3.545061  | N     | -2.608069 | 1.709837  | 0.741811  |
| H     | -3.755995 | -1.886929 | 4.428616  | C     | -2.419362 | 4.035263  | 1.889645  |
| C     | -5.620216 | -1.363970 | 3.542063  | H     | -3.317434 | 4.236831  | 2.483206  |
| H     | -6.207442 | -1.636818 | 4.416587  | H     | -1.545571 | 4.052982  | 2.549765  |
| C     | -6.242854 | -0.863468 | 2.382703  | H     | -2.309801 | 4.820518  | 1.134650  |
| H     | -7.320931 | -0.732366 | 2.328859  | C     | -2.527095 | 2.750147  | 1.251978  |
| C     | -5.468931 | -0.521137 | 1.283144  | A1-C4 |           |           |           |
| C     | 0.653096  | -0.577134 | -0.078737 | Mn    | -2.739841 | 0.139313  | 0.129350  |

O -4.363394 2.145420 1.565921  
 O -0.994129 1.650418 1.968335  
 N -1.480776 -1.334271 -0.710552  
 N -4.114321 -0.896192 -1.090823  
 C -3.852531 1.306914 0.937652  
 C -1.576327 0.965797 1.222946  
 C -0.155725 -1.554187 -0.499969  
 C 0.549976 -2.585003 -1.097714  
 H 1.605075 -2.705976 -0.867353  
 C -0.118107 -3.451623 -1.986593  
 H 0.412795 -4.266754 -2.473653  
 C -1.451609 -3.243227 -2.224408  
 H -1.984127 -3.899482 -2.906458  
 C -2.147690 -2.187786 -1.585233  
 C -3.534986 -1.941494 -1.803236  
 C -4.308149 -2.703081 -2.713365  
 H -3.839904 -3.506850 -3.273750  
 C -5.639050 -2.431882 -2.899069  
 H -6.232333 -3.016484 -3.599307  
 C -6.219021 -1.378822 -2.165718  
 H -7.272747 -1.129914 -2.266547  
 C -5.435847 -0.642095 -1.289375  
 C 0.603121 -0.656583 0.411525  
 C 0.803784 -1.021083 1.759543  
 C 1.544009 -0.179266 2.593472  
 H 1.684015 -0.460476 3.637763  
 C 2.083194 1.025174 2.134914  
 C 1.920027 1.342594 0.771309  
 H 2.273199 2.310443 0.403046  
 C 1.185818 0.513283 -0.102052  
 C 0.254429 -2.302729 2.306176  
 H 1.009007 -3.099998 2.254404  
 H -0.618169 -2.653982 1.746675  
 H -0.026277 -2.195777 3.360460  
 C 2.804542 1.951385 3.064754  
 H 3.327279 2.748766 2.525405  
 H 3.534109 1.413529 3.682818  
 H 2.095873 2.428650 3.754292  
 C 1.068452 0.869607 -1.552817  
 H 1.231311 1.939986 -1.717982  
 H 0.090328 0.597441 -1.961190  
 H 1.812442 0.326919 -2.153684  
 C -6.113841 0.447346 -0.537589  
 C -6.753920 0.152094 0.681411  
 C -7.455044 1.164755 1.336983  
 H -7.943647 0.939143 2.286882  
 C -7.546265 2.455844 0.811846  
 C -6.928847 2.715485 -0.413500  
 H -7.001972 3.714932 -0.846867  
 C -6.220344 1.730846 -1.104274  
 C -6.721839 -1.231461 1.261439  
 H -7.574164 -1.829950 0.908373  
 H -6.782371 -1.205773 2.356210  
 H -5.815694 -1.779867 0.982016  
 C -8.261819 3.540148 1.557586  
 H -9.079562 3.142174 2.169688  
 H -8.676282 4.295435 0.879784  
 H -7.580376 4.066228 2.241226  
 C -5.623271 2.042726 -2.444970  
 H -4.769309 1.400433 -2.684484  
 H -5.290448 3.085891 -2.501301  
 H -6.360260 1.899397 -3.248407  
 C -2.398396 1.306802 -1.163667  
 O -2.173050 2.089637 -1.997422  
 Mg 4.017380 0.372530 0.311226  
 S 5.681965 2.018829 -0.936889  
 O 6.829048 1.952094 -1.822147

O 5.824569 1.421538 0.437753  
 O 4.363882 1.515209 -1.452005  
 C 5.392609 3.811557 -0.609662  
 F 5.140029 4.437968 -1.755645  
 F 6.475046 4.336603 -0.041704  
 F 4.350347 3.957492 0.211710  
 S 4.428208 -2.230919 0.511958  
 O 3.879867 -1.460060 -0.660788  
 O 3.764565 -3.468559 0.875133  
 O 4.657520 -1.206922 1.586130  
 C 6.131178 -2.681558 -0.037117  
 F 6.062021 -3.570538 -1.024093  
 F 6.807496 -3.199289 0.984395  
 F 6.755526 -1.584258 -0.471582  
 N -3.149788 -1.324749 1.578366  
 C -3.342622 -2.124715 2.398062  
 C -3.572360 -3.123958 3.407125  
 H -4.634338 -3.389752 3.438418  
 H -2.988055 -4.022600 3.183116  
 H -3.272902 -2.741788 4.388430

A1-Z2

Mn -2.774847 0.727680 -0.165731  
 O -4.737686 1.676205 -2.162714  
 O -1.110749 2.253310 -2.071153  
 N -1.408353 0.390340 1.377155  
 N -4.006639 -0.081367 1.323336  
 C -4.046036 1.246641 -1.329305  
 C -1.691659 1.634303 -1.271006  
 C -0.051263 0.433458 1.352835  
 C 0.718188 0.553667 2.496734  
 H 1.801778 0.601941 2.407313  
 C 0.078456 0.586479 3.754858  
 H 0.659224 0.685179 4.669225  
 C -1.286909 0.442935 3.803974  
 H -1.795728 0.415251 4.764127  
 C -2.039017 0.320159 2.614373  
 C -3.439600 0.054093 2.584182  
 C -4.223388 -0.135718 3.744415  
 H -3.775183 0.005754 4.724456  
 C -5.538471 -0.517136 3.636096  
 H -6.146326 -0.666967 4.526086  
 C -6.072862 -0.752431 2.354003  
 H -7.091567 -1.109019 2.221590  
 C -5.283869 -0.535415 1.233633  
 C 0.632091 0.262680 0.046533  
 C 1.317978 1.338467 -0.549826  
 C 1.995579 1.120186 -1.764569  
 H 2.503773 1.957370 -2.244160  
 C 1.989662 -0.132571 -2.403808  
 C 1.328130 -1.192977 -1.761677  
 H 1.352102 -2.184781 -2.215034  
 C 0.653183 -1.019529 -0.549784  
 C 1.314324 2.704460 0.066579  
 H 2.056940 2.790071 0.870717  
 H 0.338605 2.938992 0.509779  
 H 1.548554 3.470477 -0.679805  
 C 2.676622 -0.337670 -3.717510  
 H 3.313352 -1.230769 -3.706621  
 H 3.292085 0.524862 -3.990460  
 H 1.936963 -0.488043 -4.514320  
 C 0.063605 -2.203767 0.151220  
 H -0.940872 -2.002038 0.538808  
 H 0.684375 -2.473214 1.016423  
 H 0.013808 -3.073403 -0.511147  
 C -5.843217 -0.861766 -0.103671  
 C -6.800697 -0.022854 -0.696742



C -7.338937 -0.380603 -1.935594  
 H -8.065881 0.284067 -2.405863  
 C -6.954288 -1.547285 -2.596542  
 C -6.016299 -2.379039 -1.974678  
 H -5.715613 -3.306988 -2.465177  
 C -5.466859 -2.067448 -0.731261  
 C -7.214957 1.261242 -0.040938  
 H -7.921843 1.092586 0.783049  
 H -7.704059 1.929349 -0.758860  
 H -6.357273 1.796457 0.388767  
 C -7.531140 -1.911423 -3.930497  
 H -8.225475 -1.145689 -4.293476  
 H -8.077334 -2.863098 -3.886832  
 H -6.746823 -2.039331 -4.687897  
 C -4.554069 -3.043040 -0.048055  
 H -3.698315 -2.557136 0.435566  
 H -4.168376 -3.787919 -0.752388  
 H -5.089952 -3.585355 0.744437  
 C -2.507712 -0.733809 -1.138402  
 O -2.333381 -1.620079 -1.876232  
 Mg 3.656191 -0.203742 -0.463229  
 S 5.908929 1.212857 -0.516443  
 O 7.335182 0.959357 -0.428289  
 O 5.065922 0.842872 0.675933  
 O 5.168313 0.688946 -1.709927  
 C 5.725436 3.044046 -0.636543  
 F 6.222138 3.615680 0.458344  
 F 4.434087 3.360914 -0.750791  
 F 6.382088 3.485968 -1.706843  
 S 3.889169 -2.753407 0.256907  
 O 4.373632 -2.118722 -1.015790  
 O 3.151052 -3.999291 0.158083  
 O 3.268584 -1.636325 1.049591  
 C 5.442962 -3.144558 1.171917  
 F 6.118869 -4.084293 0.514331  
 F 5.143117 -3.583520 2.392491  
 F 6.193993 -2.047908 1.268952  
 N -3.114532 2.561862 0.916115  
 C -3.521576 4.939095 1.890503  
 H -3.733515 5.647915 1.083648  
 H -4.373021 4.919550 2.578259  
 H -2.633494 5.275990 2.434653  
 C -3.297142 3.625801 1.346736

B0-O1

Mn 1.329156 0.753906 -0.444069  
 O 0.636065 -1.791256 -1.803658  
 O -1.562618 0.342883 -0.216785  
 N 1.700870 2.607618 0.450719  
 N 3.425542 0.770867 -0.425876  
 C 1.050052 -0.875798 -1.225733  
 C -0.428673 0.662229 -0.268956  
 C 0.782018 3.491045 0.918720  
 C 1.175486 4.683469 1.529216  
 H 0.407075 5.354787 1.903959  
 C 2.519818 5.003978 1.626191  
 H 2.839445 5.931617 2.094405  
 C 3.452997 4.127435 1.094156  
 H 4.510604 4.363029 1.143834  
 C 3.019596 2.939217 0.511213  
 C 3.959523 1.962921 -0.049982  
 C 5.321792 2.223802 -0.169152  
 H 5.727163 3.188827 0.115469  
 C 6.159799 1.234108 -0.662954  
 H 7.225049 1.421075 -0.773837  
 C 5.622301 -0.004618 -0.971422  
 H 6.254633 -0.825859 -1.298125

C 4.250078 -0.227404 -0.826564  
 C -0.670075 3.246250 0.731310  
 C -1.452470 2.765136 1.800692  
 C -2.818768 2.578130 1.595579  
 H -3.422393 2.176171 2.411306  
 C -3.432655 2.888544 0.376717  
 C -2.641944 3.414179 -0.645784  
 H -3.106393 3.678227 -1.597168  
 C -1.269859 3.616298 -0.489542  
 C -0.834459 2.478788 3.135090  
 H -0.638160 3.410676 3.684593  
 H 0.123575 1.954673 3.048277  
 H -1.495622 1.865577 3.756098  
 C -4.904519 2.691576 0.184889  
 H -5.188222 2.765213 -0.870341  
 H -5.478031 3.452201 0.732307  
 H -5.237588 1.717707 0.562525  
 C -0.490827 4.283387 -1.583702  
 H -0.896270 4.037107 -2.571237  
 H 0.573727 4.027277 -1.578677  
 H -0.546445 5.376374 -1.478213  
 C 3.726050 -1.599168 -1.004970  
 C 3.224860 -2.286895 0.123783  
 C 2.814079 -3.609351 -0.026678  
 H 2.421127 -4.137050 0.844569  
 C 2.885077 -4.268417 -1.257358  
 C 3.375418 -3.561868 -2.358210  
 H 3.414161 -4.052850 -3.331556  
 C 3.806961 -2.239120 -2.256246  
 C 3.100164 -1.612899 1.455847  
 H 4.014988 -1.077080 1.741662  
 H 2.868463 -2.337668 2.243657  
 H 2.286708 -0.872245 1.458770  
 C 2.456435 -5.696473 -1.385169  
 H 3.212478 -6.374634 -0.966012  
 H 2.306552 -5.982622 -2.431748  
 H 1.525920 -5.890179 -0.838248  
 C 4.276993 -1.504321 -3.475554  
 H 5.357285 -1.309278 -3.456365  
 H 3.784054 -0.527031 -3.573880  
 H 4.066782 -2.079437 -4.383317  
 C 1.191816 1.428350 -2.073769  
 O 1.141466 1.825126 -3.162326

Mg -2.488122 -1.463157 0.531148

S -0.683476 -1.430808 2.467502  
 O 0.381039 -0.550238 2.912162  
 O -0.538212 -2.058692 1.106410  
 O -2.089226 -0.895946 2.510763  
 C -0.678678 -2.873785 3.619234  
 F 0.496176 -3.492921 3.528498  
 F -1.652695 -3.716791 3.281178  
 F -0.868525 -2.448868 4.863932  
 S -4.386795 -1.512500 -1.294668  
 O -4.423859 -0.854555 0.060938  
 O -5.479780 -2.399848 -1.642549  
 O -2.983545 -2.044374 -1.425787  
 C -4.482989 -0.116285 -2.500655  
 F -5.677446 0.461595 -2.393096  
 F -4.329111 -0.599599 -3.730819  
 F -3.533472 0.780998 -2.254002

B0-O2

Mn -1.952856 0.007704 -1.056747  
 O -0.824983 -1.927212 -3.024652  
 O -0.651065 1.929020 -2.924430  
 N -3.243091 1.306667 -0.095537  
 N -3.238118 -1.313807 -0.120383

|    |           |           |           |       |           |           |           |
|----|-----------|-----------|-----------|-------|-----------|-----------|-----------|
| C  | -1.254285 | -1.234787 | -2.206428 | F     | 5.244307  | 0.033095  | -2.036267 |
| C  | -1.169588 | 1.248761  | -2.147967 | F     | 4.536280  | 1.094105  | -3.797705 |
| C  | -3.106238 | 2.642118  | 0.092395  | S     | 3.310567  | 0.006705  | 2.809256  |
| C  | -4.225398 | 3.444342  | 0.313387  | O     | 3.072607  | -1.184471 | 1.918542  |
| H  | -4.086646 | 4.512535  | 0.458405  | O     | 4.496203  | 0.007278  | 3.642469  |
| C  | -5.486454 | 2.866628  | 0.376903  | O     | 3.066235  | 1.201676  | 1.925075  |
| H  | -6.366736 | 3.480740  | 0.550088  | C     | 1.864309  | -0.004068 | 3.954250  |
| C  | -5.610036 | 1.488347  | 0.261644  | F     | 0.741114  | 0.049793  | 3.241588  |
| H  | -6.581628 | 1.014482  | 0.359361  | F     | 1.926720  | 1.052083  | 4.760414  |
| C  | -4.467340 | 0.725899  | 0.035135  | F     | 1.876629  | -1.124105 | 4.672392  |
| C  | -4.466256 | -0.743954 | 0.009708  |       |           |           |           |
| C  | -5.608181 | -1.520249 | 0.189151  | B0-C1 |           |           |           |
| H  | -6.587353 | -1.058043 | 0.264723  | Mn    | 1.666253  | 0.213367  | -0.165458 |
| C  | -5.474013 | -2.899424 | 0.281394  | O     | 3.029316  | -1.110558 | -2.437947 |
| H  | -6.352587 | -3.524974 | 0.418573  | O     | -0.044712 | 1.125276  | -2.411462 |
| C  | -4.205796 | -3.464427 | 0.246003  | N     | 0.398757  | 0.755436  | 1.409889  |
| H  | -4.060591 | -4.532704 | 0.384166  | N     | 2.553159  | -0.748744 | 1.444554  |
| C  | -3.089830 | -2.649611 | 0.057119  | C     | 2.559140  | -0.625100 | -1.494943 |
| C  | -1.732966 | 3.188458  | 0.153635  | C     | 0.579450  | 0.805735  | -1.488208 |
| C  | -1.241551 | 4.051421  | -0.842235 | C     | -0.600483 | 1.670965  | 1.399920  |
| C  | 0.091819  | 4.457177  | -0.768525 | C     | -1.681019 | 1.552522  | 2.279540  |
| H  | 0.491348  | 5.089158  | -1.563213 | H     | -2.467995 | 2.302557  | 2.253141  |
| C  | 0.929068  | 4.067151  | 0.280841  | C     | -1.711265 | 0.514079  | 3.202722  |
| C  | 0.388916  | 3.277745  | 1.300604  | H     | -2.543335 | 0.415253  | 3.896559  |
| H  | 1.010711  | 2.996652  | 2.152744  | C     | -0.645383 | -0.376232 | 3.255428  |
| C  | -0.934462 | 2.839572  | 1.263069  | H     | -0.629475 | -1.171613 | 3.994087  |
| C  | -2.107202 | 4.508577  | -1.977999 | C     | 0.409427  | -0.216944 | 2.359038  |
| H  | -2.743027 | 5.352755  | -1.677166 | C     | 1.634074  | -1.026297 | 2.408341  |
| H  | -2.781576 | 3.721754  | -2.337863 | C     | 1.883844  | -1.960497 | 3.409731  |
| H  | -1.500058 | 4.846653  | -2.824444 | H     | 1.135213  | -2.174593 | 4.165796  |
| C  | 2.357044  | 4.514966  | 0.326350  | C     | 3.115900  | -2.599087 | 3.441667  |
| H  | 2.960768  | 3.876658  | 0.980933  | H     | 3.334022  | -3.331003 | 4.215425  |
| H  | 2.439445  | 5.541951  | 0.708167  | C     | 4.074761  | -2.262051 | 2.497222  |
| H  | 2.811098  | 4.512315  | -0.671600 | H     | 5.067205  | -2.704803 | 2.519169  |
| C  | -1.505170 | 2.060179  | 2.410598  | C     | 3.777016  | -1.324096 | 1.507260  |
| H  | -0.838017 | 2.092872  | 2.376855  | C     | -0.484627 | 2.841903  | 0.502625  |
| H  | -1.671864 | 1.003121  | 2.163765  | C     | -1.465107 | 3.094975  | -0.476793 |
| H  | -2.480967 | 2.458395  | 2.718590  | C     | -1.321433 | 4.215404  | -1.296962 |
| C  | -1.711246 | -3.178874 | 0.148378  | H     | -2.063366 | 4.391423  | -2.077041 |
| C  | -1.189061 | -4.051156 | -0.823886 | C     | -0.253868 | 5.102642  | -1.157410 |
| C  | 0.147239  | -4.441263 | -0.715921 | C     | 0.683072  | 4.852425  | -0.150017 |
| H  | 0.569416  | -5.082836 | -1.490955 | H     | 1.511727  | 5.547649  | -0.006590 |
| C  | 0.956181  | -4.033155 | 0.348279  | C     | 0.586265  | 3.746516  | 0.692893  |
| C  | 0.384818  | -3.237700 | 1.346198  | C     | -2.625228 | 2.168886  | -0.689641 |
| H  | 0.983787  | -2.940697 | 2.209153  | H     | -3.418978 | 2.326267  | 0.053257  |
| C  | -0.940114 | -2.810057 | 1.272102  | H     | -2.326746 | 1.117655  | -0.624374 |
| C  | -2.027347 | -4.558462 | -1.958786 | H     | -3.075917 | 2.322942  | -1.676409 |
| H  | -2.593494 | -5.450895 | -1.657409 | C     | -0.123599 | 6.303564  | -2.041371 |
| H  | -1.403829 | -4.846589 | -2.811758 | H     | -0.316379 | 7.229862  | -1.483463 |
| H  | -2.762574 | -3.824418 | -2.308194 | H     | -0.830363 | 6.269391  | -2.877501 |
| C  | 2.385032  | -4.471923 | 0.434344  | H     | 0.889118  | 6.393504  | -2.453134 |
| H  | 2.862604  | -4.483197 | -0.552487 | C     | 1.556834  | 3.604238  | 1.830691  |
| H  | 2.463158  | -5.492117 | 0.834909  | H     | 2.001618  | 2.605761  | 1.904837  |
| H  | 2.969746  | -3.820281 | 1.092584  | H     | 1.057023  | 3.790420  | 2.792019  |
| C  | -1.542586 | -2.027110 | 2.401351  | H     | 2.374623  | 4.326836  | 1.737182  |
| H  | -2.475322 | -2.489541 | 2.751685  | C     | 4.812951  | -0.903078 | 0.538205  |
| H  | -1.804596 | -0.999811 | 2.115403  | C     | 5.268278  | -1.806690 | -0.438152 |
| H  | -0.855638 | -1.970467 | 3.250759  | C     | 6.250672  | -1.383176 | -1.335321 |
| C  | -0.499204 | -0.020139 | -0.131754 | H     | 6.586512  | -2.072903 | -2.111058 |
| O  | 0.537648  | -0.020488 | 0.431549  | C     | 6.799061  | -0.100778 | -1.277617 |
| Mg | 2.648057  | 0.009191  | 0.261329  | C     | 6.353404  | 0.764919  | -0.273558 |
| S  | 2.652790  | -0.019379 | -2.375910 | H     | 6.785776  | 1.763977  | -0.196625 |
| O  | 1.763777  | -0.053192 | -3.519848 | C     | 5.376627  | 0.386562  | 0.646186  |
| O  | 2.644076  | -1.204561 | -1.445092 | C     | 4.688700  | -3.185306 | -0.552981 |
| O  | 2.590705  | 1.186185  | -1.473529 | H     | 5.095961  | -3.862805 | 0.210061  |
| C  | 4.373502  | 0.009294  | -3.047243 | H     | 4.914113  | -3.623864 | -1.531015 |
| F  | 4.577243  | -1.079765 | -3.781354 | H     | 3.597839  | -3.189802 | -0.425057 |

C 7.833011 0.345404 -2.264439  
H 8.204379 -0.489922 -2.867700  
H 8.690233 0.814564 -1.765880  
H 7.425710 1.096060 -2.955050  
C 5.005766 1.313562 1.766977  
H 3.923918 1.377290 1.933650  
H 5.375275 2.327188 1.579037  
H 5.444006 0.971462 2.715397  
C 2.678720 1.632466 -0.427479  
O 3.334657 2.563024 -0.663693  
Mg -3.335353 -1.413085 0.760536  
S -1.231104 -2.551675 -0.397105  
O 0.055710 -3.058441 0.045920  
O -1.496506 -1.082522 -0.201944  
O -2.471504 -3.238058 0.103637  
C -1.249417 -2.756377 -2.231411  
F -0.226393 -2.066308 -2.739778  
F -2.389376 -2.293225 -2.732008  
F -1.114027 -4.042664 -2.535178  
S -5.709593 -0.960962 -0.315583  
O -5.395037 -1.776838 0.911688  
O -6.716623 -1.466886 -1.225293  
O -4.370005 -0.572209 -0.872808  
C -6.349972 0.630221 0.368816  
F -7.548651 0.445772 0.910629  
F -6.427193 1.531676 -0.604999  
F -5.503456 1.071356 1.308299

#### B0-C2

Mn 1.999522 1.392543 0.408779  
O 4.603785 2.043301 -0.851316  
O 1.629299 4.094667 -0.753086  
N 0.115455 0.992461 1.221225  
N 2.324324 -0.465010 1.341169  
C 3.626789 1.665275 -0.351001  
C 1.648515 3.017501 -0.319510  
C -1.023964 1.697740 1.018979  
C -2.124226 1.530354 1.867058  
H -3.031971 2.091508 1.663133  
C -2.053812 0.650072 2.934836  
H -2.893434 0.535428 3.616858  
C -0.902346 -0.107980 3.102383  
H -0.833570 -0.821256 3.917136  
C 0.156433 0.062532 2.212702  
C 1.358658 -0.777857 2.246231  
C 1.480432 -1.868492 3.103368  
H 0.694374 -2.107978 3.811908  
C 2.616526 -2.661599 3.033106  
H 2.729827 -3.520333 3.690187  
C 3.591042 -2.349706 2.099644  
H 4.484068 -2.960151 1.993556  
C 3.426842 -1.246057 1.257098  
C -1.152649 2.619791 -0.131287  
C -1.021541 2.140769 -1.452114  
C -1.272481 3.015395 -2.511635  
H -1.186442 2.637469 -3.531362  
C -1.624816 4.348737 -2.305871  
C -1.706548 4.810466 -0.988215  
H -1.940318 5.860278 -0.804288  
C -1.486259 3.973681 0.102369  
C -0.580476 0.742153 -1.758827  
H -0.986131 -0.001680 -1.066147  
H 0.518849 0.668467 -1.708549  
H -0.867109 0.455522 -2.776664  
C -1.899240 5.265495 -3.456377  
H -2.947624 5.592204 -3.463577  
H -1.695186 4.781390 -4.417411

H -1.290889 6.176888 -3.398471  
C -1.520908 4.548347 1.488505  
H -1.462100 5.641385 1.451620  
H -0.683219 4.186615 2.100140  
H -2.441096 4.294660 2.030669  
C 4.462513 -0.981127 0.232538  
C 4.162408 -1.186283 -1.127589  
C 5.178992 -1.033469 -2.070686  
H 4.947923 -1.199968 -3.123806  
C 6.476025 -0.672691 -1.702687  
C 6.743040 -0.457288 -0.346643  
H 7.745514 -0.152395 -0.042001  
C 5.763185 -0.611499 0.631698  
C 2.772261 -1.528399 -1.563534  
H 2.361008 -2.389403 -1.019593  
H 2.733623 -1.750278 -2.634772  
H 2.089383 -0.685349 -1.374165  
C 7.551346 -0.498364 -2.729401  
H 7.214731 -0.808691 -3.724406  
H 8.447660 -1.078904 -2.477090  
H 7.869895 0.550360 -2.798216  
C 6.078991 -0.321310 2.068723  
H 5.345574 0.368664 2.509712  
H 7.070044 0.133987 2.166821  
H 6.071146 -1.225632 2.691446  
C 2.563471 2.214790 1.854929  
O 2.924110 2.737915 2.829153  
Mg -2.858117 -2.210148 0.995299

S -1.014371 -3.456651 -0.467541  
O 0.054493 -4.430092 -0.348696  
O -0.846904 -2.148817 0.254385  
O -2.418174 -3.901277 -0.151829  
C -1.108221 -3.008696 -2.258587  
F 0.015840 -2.398423 -2.628863  
F -2.140778 -2.195305 -2.468263  
F -1.267952 -4.119508 -2.973577  
S -4.866607 -1.026875 -0.282609  
O -4.954949 -2.219447 0.629049  
O -5.537013 -1.102090 -1.566160  
O -3.416256 -0.629791 -0.271710  
C -5.702991 0.321377 0.660712  
F -7.011492 0.088316 0.705627  
F -5.476560 1.488531 0.062165  
F -5.219841 0.363362 1.904702

#### B0-C3

Mn 2.890028 -0.545875 0.527292  
O 4.845977 0.560172 2.459170  
O 1.317210 0.071878 2.959780  
N 1.506332 -1.473387 -0.770269  
N 4.039338 -0.825315 -1.203268  
C 4.156155 0.183179 1.604933  
C 1.830624 -0.198710 1.953318  
C 0.191424 -1.697241 -0.545005  
C -0.560527 -2.531274 -1.374954  
H -1.617792 -2.665904 -1.160154  
C 0.044803 -3.154281 -2.454522  
H -0.522971 -3.811362 -3.108506  
C 1.387882 -2.911079 -2.697179  
H 1.878844 -3.375997 -3.545162  
C 2.093642 -2.061117 -1.848176  
C 3.495058 -1.700713 -2.089423  
C 4.211949 -2.173304 -3.185416  
H 3.766865 -2.879912 -3.877677  
C 5.506831 -1.719652 -3.393866  
H 6.083701 -2.076530 -4.243489  
C 6.034442 -0.779937 -2.524282

|       |           |           |           |    |           |           |           |
|-------|-----------|-----------|-----------|----|-----------|-----------|-----------|
| H     | 7.023673  | -0.359037 | -2.683578 | N  | -4.052037 | -1.073278 | -1.066995 |
| C     | 5.279872  | -0.334474 | -1.434926 | C  | -4.310378 | -0.503802 | 1.800884  |
| C     | -0.507856 | -1.012020 | 0.569300  | C  | -2.044994 | -1.275723 | 2.223456  |
| C     | -0.764380 | 0.367252  | 0.477609  | C  | -0.250947 | -2.000192 | -0.448850 |
| C     | -1.534835 | 0.975913  | 1.486824  | C  | 0.459743  | -2.920421 | -1.217874 |
| H     | -1.679551 | 2.061148  | 1.457353  | H  | 1.530176  | -3.023917 | -1.058717 |
| C     | -2.008955 | 0.250618  | 2.598835  | C  | -0.206606 | -3.674922 | -2.173919 |
| C     | -1.747465 | -1.120878 | 2.643982  | H  | 0.328977  | -4.406481 | -2.773740 |
| H     | -2.124310 | -1.706067 | 3.482968  | C  | -1.560186 | -3.455230 | -2.382171 |
| C     | -1.010800 | -1.765746 | 1.649253  | H  | -2.091226 | -4.001332 | -3.155127 |
| C     | -0.235506 | 1.180071  | -0.661817 | C  | -2.220741 | -2.507387 | -1.603631 |
| H     | -0.500216 | 0.743671  | -1.633864 | C  | -3.604523 | -2.089056 | -1.853713 |
| H     | 0.862092  | 1.223520  | -0.626272 | C  | -4.380016 | -2.614407 | -2.883299 |
| H     | -0.609972 | 2.207607  | -0.629677 | H  | -4.013909 | -3.439277 | -3.486007 |
| C     | -2.754770 | 0.934383  | 3.700476  | C  | -5.622853 | -2.053621 | -3.142819 |
| H     | -3.450820 | 0.252448  | 4.199435  | H  | -6.243761 | -2.444042 | -3.945353 |
| H     | -3.313686 | 1.805424  | 3.338726  | C  | -6.040029 | -0.964988 | -2.391691 |
| H     | -2.052081 | 1.300147  | 4.461110  | H  | -6.981927 | -0.464349 | -2.600711 |
| C     | -0.762109 | -3.237155 | 1.744267  | C  | -5.237095 | -0.483044 | -1.356030 |
| H     | -1.028252 | -3.617013 | 2.735382  | C  | 0.467089  | -1.144356 | 0.526850  |
| H     | 0.289420  | -3.484446 | 1.548735  | C  | 1.046577  | -1.722185 | 1.677035  |
| H     | -1.359451 | -3.791541 | 1.008361  | C  | 1.751248  | -0.909710 | 2.564549  |
| C     | 5.820192  | 0.742706  | -0.578687 | H  | 2.182077  | -1.357169 | 3.460355  |
| C     | 5.171275  | 1.994635  | -0.547785 | C  | 1.892035  | 0.467504  | 2.354992  |
| C     | 5.740217  | 3.024371  | 0.203275  | C  | 1.361395  | 1.010048  | 1.169095  |
| H     | 5.245690  | 3.996573  | 0.219755  | H  | 1.427533  | 2.087966  | 0.996524  |
| C     | 6.919457  | 2.844985  | 0.928198  | C  | 0.648434  | 0.220013  | 0.242176  |
| C     | 7.533510  | 1.588933  | 0.891570  | C  | 0.909834  | -3.185344 | 1.955759  |
| H     | 8.441668  | 1.421697  | 1.472765  | H  | 1.561270  | -3.774180 | 1.296739  |
| C     | 7.010819  | 0.533990  | 0.147879  | H  | -0.114392 | -3.541620 | 1.789779  |
| C     | 3.889009  | 2.234061  | -1.288352 | H  | 1.192196  | -3.416595 | 2.987576  |
| H     | 3.922765  | 1.858964  | -2.319205 | C  | 2.590378  | 1.329327  | 3.359500  |
| H     | 3.648478  | 3.301879  | -1.320342 | H  | 2.652448  | 2.370848  | 3.030303  |
| H     | 3.038924  | 1.728619  | -0.803662 | H  | 3.605675  | 0.967264  | 3.565679  |
| C     | 7.505335  | 3.955480  | 1.742882  | H  | 2.052567  | 1.308306  | 4.315335  |
| H     | 6.967414  | 4.897290  | 1.591162  | C  | 0.194306  | 0.836195  | -1.048055 |
| H     | 8.561089  | 4.122553  | 1.494829  | H  | 0.098945  | 1.922502  | -0.957121 |
| H     | 7.472114  | 3.721598  | 2.815339  | H  | -0.763504 | 0.438516  | -1.398536 |
| C     | 7.661184  | -0.816370 | 0.202968  | H  | 0.927803  | 0.632623  | -1.842687 |
| H     | 6.926478  | -1.607328 | 0.409904  | C  | -5.647288 | 0.714399  | -0.590030 |
| H     | 8.420796  | -0.849444 | 0.991020  | C  | -6.783434 | 0.657788  | 0.242769  |
| H     | 8.157088  | -1.086799 | -0.738217 | C  | -7.149559 | 1.798652  | 0.953350  |
| C     | 3.303283  | -2.115988 | 1.202545  | H  | -8.010940 | 1.747127  | 1.621096  |
| O     | 3.585793  | -3.164135 | 1.618020  | C  | -6.430989 | 2.994155  | 0.852853  |
| Mg    | -3.658473 | 0.619974  | 0.427452  | C  | -5.333091 | 3.033644  | -0.008094 |
| S     | -4.579955 | -1.851709 | 0.727947  | H  | -4.776009 | 3.964985  | -0.120704 |
| O     | -4.336789 | -3.099504 | 1.426197  | C  | -4.931846 | 1.918772  | -0.748001 |
| O     | -3.537732 | -1.377867 | -0.248374 | C  | -7.560379 | -0.613708 | 0.413561  |
| O     | -4.943258 | -0.640620 | 1.539875  | H  | -8.199203 | -0.823745 | -0.454971 |
| C     | -6.065053 | -2.113394 | -0.334161 | H  | -8.213280 | -0.557332 | 1.291110  |
| F     | -5.813744 | -3.064657 | -1.229551 | H  | -6.904550 | -1.485477 | 0.536675  |
| F     | -6.350711 | -0.972710 | -0.968959 | C  | -6.833924 | 4.194769  | 1.651278  |
| F     | -7.101616 | -2.470620 | 0.418310  | H  | -7.891208 | 4.444316  | 1.496303  |
| S     | -5.009279 | 2.466178  | -0.931282 | H  | -6.235925 | 5.074509  | 1.390481  |
| O     | -4.986196 | 2.272726  | 0.558334  | H  | -6.711818 | 4.016082  | 2.727808  |
| O     | -6.291192 | 2.691488  | -1.570035 | C  | -3.825670 | 2.057902  | -1.753750 |
| O     | -4.132743 | 1.376017  | -1.484232 | H  | -3.140114 | 1.203251  | -1.771274 |
| C     | -4.017354 | 4.001074  | -1.183359 | H  | -3.233389 | 2.959566  | -1.565515 |
| F     | -4.666633 | 5.042169  | -0.670479 | H  | -4.239687 | 2.142537  | -2.768713 |
| F     | -3.812232 | 4.197755  | -2.482675 | C  | -2.408956 | 0.719601  | 0.768904  |
| F     | -2.839693 | 3.868473  | -0.565284 | O  | -2.067779 | 1.824075  | 0.898289  |
|       |           |           |           | Mg | 3.521330  | 0.564096  | 0.221924  |
|       |           |           |           | S  | 4.827470  | 2.674495  | -0.664700 |
| B0-C4 |           |           |           | O  | 6.181675  | 3.172201  | -0.803628 |
| Mn    | -2.946872 | -0.957693 | 0.686982  | O  | 4.286807  | 2.465323  | 0.722523  |
| O     | -5.081135 | -0.242593 | 2.626113  | O  | 4.457714  | 1.426363  | -1.424043 |
| O     | -1.580648 | -1.453432 | 3.271680  | C  | 3.716955  | 3.965400  | -1.376504 |
| N     | -1.583276 | -1.828900 | -0.612477 |    |           |           |           |

F 3.995380 4.133732 -2.666049  
F 3.894810 5.111640 -0.726124  
F 2.446382 3.575354 -1.246453  
S 4.573812 -1.815114 0.669318  
O 3.522198 -1.454372 -0.348464  
O 4.338613 -2.983108 1.496681  
O 4.915993 -0.520833 1.354663  
C 6.067508 -2.193677 -0.347310  
F 5.844304 -3.292138 -1.064592  
F 7.108838 -2.388863 0.457313  
F 6.324533 -1.174605 -1.165203

B0-Z1

Mn -2.074325 1.325447 -0.419603  
O -4.738254 1.864641 0.765538  
O -1.862631 4.005749 0.828502  
N -0.154725 1.009005 -1.197708  
N -2.303749 -0.526287 -1.389452  
C -3.732859 1.525629 0.293989  
C -1.814343 2.944284 0.359955  
C 0.957148 1.744064 -0.952859  
C 2.106063 1.584044 -1.734774  
H 2.989119 2.169477 -1.491096  
C 2.104640 0.697024 -2.800707  
H 2.977880 0.592484 -3.440330  
C 0.973347 -0.075517 -3.026030  
H 0.956224 -0.790124 -3.842405  
C -0.129604 0.077224 -2.188050  
C -1.306955 -0.792790 -2.274482  
C -1.376052 -1.867324 -3.157171  
H -0.569259 -2.065306 -3.854735  
C -2.488768 -2.695653 -3.130199  
H -2.561917 -3.541377 -3.809498  
C -3.489788 -2.438064 -2.208468  
H -4.362415 -3.081293 -2.131172  
C -3.377938 -1.348087 -1.339880  
C 0.992418 2.710987 0.168403  
C 0.880159 2.259061 1.501501  
C 1.015374 3.180889 2.537044  
H 0.940881 2.826419 3.566255  
C 1.242773 4.538487 2.293649  
C 1.325130 4.963861 0.966872  
H 1.475017 6.023584 0.755447  
C 1.209755 4.076342 -0.103814  
C 0.596856 0.823033 1.814340  
H 1.229283 0.139046 1.238795  
H -0.445307 0.562434 1.567311  
H 0.738957 0.613656 2.879934  
C 1.367650 5.506831 3.428175  
H 1.695361 6.493866 3.084754  
H 2.081605 5.152901 4.182250  
H 0.408121 5.638469 3.946170  
C 1.237371 4.600869 -1.509125  
H 1.139629 5.691580 -1.516408  
H 0.417439 4.185138 -2.111583  
H 2.169884 4.355999 -2.034297  
C -4.429982 -1.140352 -0.320684  
C -4.125175 -1.342470 1.040104  
C -5.151112 -1.237673 1.978794  
H -4.918705 -1.403455 3.031768  
C -6.460684 -0.925551 1.606944  
C -6.731200 -0.712737 0.252051  
H -7.743845 -0.445793 -0.054310  
C -5.741201 -0.818494 -0.723194  
C -2.725029 -1.638201 1.481494  
H -2.686975 -1.863576 2.551865  
H -2.061685 -0.776713 1.300964

H -2.282923 -2.484214 0.937894  
C -7.540108 -0.783189 2.634156  
H -7.293770 -1.317217 3.558478  
H -8.502650 -1.156739 2.265682  
H -7.693127 0.271688 2.901374  
C -6.058224 -0.516639 -2.157660  
H -5.347481 0.208730 -2.579289  
H -7.064753 -0.096448 -2.255112  
H -6.012644 -1.408124 -2.796959  
C -2.621433 2.158410 -1.866122  
O -2.968497 2.689050 -2.841276  
Mg 2.940905 -2.105344 -0.855068  
S 1.064817 -3.300237 0.591781  
O -0.026780 -4.242122 0.432583  
O 0.949145 -1.975678 -0.113272  
O 2.461771 -3.779706 0.296312  
C 1.125439 -2.877024 2.389652  
F -0.005206 -2.268007 2.743007  
F 2.154796 -2.069247 2.628763  
F 1.267002 -3.997152 3.093024  
S 5.148300 -1.083312 0.192376  
O 5.046556 -2.166920 -0.848184  
O 6.024072 -1.312579 1.324649  
O 3.727116 -0.678797 0.472952  
C 5.861533 0.355349 -0.722026  
F 7.142405 0.117642 -0.987759  
F 5.752600 1.449337 0.027038  
F 5.202133 0.538738 -1.867512

B0-Z2

Mn -2.889268 -0.485115 -0.531597  
O -4.830681 0.359096 -2.604761  
O -1.208207 0.334263 -2.827370  
N -1.487891 -1.131960 0.909041  
N -4.123479 -1.070328 1.055808  
C -4.160115 0.054403 -1.707773  
C -1.774277 0.026737 -1.860478  
C -0.142376 -1.004657 0.860745  
C 0.685719 -1.704987 1.740056  
H 1.762973 -1.567982 1.676042  
C 0.125798 -2.553269 2.682928  
H 0.755791 -3.114432 3.368416  
C -1.255457 -2.654557 2.755531  
H -1.715005 -3.292998 3.502703  
C -2.040869 -1.922335 1.867817  
C -3.505845 -1.890330 1.948031  
C -4.221398 -2.590201 2.915227  
H -3.715372 -3.250926 3.611319  
C -5.596968 -2.419841 2.992944  
H -6.175231 -2.954576 3.742332  
C -6.211230 -1.528826 2.128929  
H -7.275808 -1.322593 2.199487  
C -5.454853 -0.853167 1.165894  
C 0.469932 -0.059310 -0.102752  
C 0.322411 1.328016 0.095374  
C 0.941735 2.210897 -0.792586  
H 0.820646 3.282572 -0.636011  
C 1.733829 1.761934 -1.848386  
C 1.899063 0.370997 -2.005880  
H 2.449579 -0.004882 -2.871519  
C 1.252773 -0.551874 -1.165689  
C -0.425766 1.861993 1.275021  
H 0.077299 1.580335 2.211164  
H -1.444866 1.460997 1.337138  
H -0.490223 2.954008 1.242984  
C 2.405545 2.712976 -2.786723  
H 3.494423 2.570545 -2.785548

|       |           |           |           |
|-------|-----------|-----------|-----------|
| H     | 2.198816  | 3.754383  | -2.522434 |
| H     | 2.070673  | 2.547724  | -3.818406 |
| C     | 1.348040  | -2.021007 | -1.451666 |
| H     | 0.348328  | -2.445387 | -1.621150 |
| H     | 1.787090  | -2.587904 | -0.620724 |
| H     | 1.948307  | -2.211745 | -2.347075 |
| C     | -6.109297 | 0.165870  | 0.317889  |
| C     | -5.708637 | 1.515037  | 0.414705  |
| C     | -6.399466 | 2.473383  | -0.329385 |
| H     | -6.097749 | 3.518529  | -0.246963 |
| C     | -7.459310 | 2.133358  | -1.170761 |
| C     | -7.821097 | 0.785442  | -1.265393 |
| H     | -8.626059 | 0.495360  | -1.942461 |
| C     | -7.171776 | -0.205441 | -0.533940 |
| C     | -4.552491 | 1.940691  | 1.270716  |
| H     | -4.531750 | 1.432990  | 2.242702  |
| H     | -4.575651 | 3.021057  | 1.449478  |
| H     | -3.589576 | 1.722318  | 0.781666  |
| C     | -8.186487 | 3.175448  | -1.961425 |
| H     | -9.243739 | 3.232102  | -1.670813 |
| H     | -8.172109 | 2.946288  | -3.034646 |
| H     | -7.747453 | 4.169070  | -1.822138 |
| C     | -7.544198 | -1.644893 | -0.732889 |
| H     | -6.655355 | -2.270906 | -0.895113 |
| H     | -8.198428 | -1.758434 | -1.603639 |
| H     | -8.074927 | -2.069518 | 0.128957  |
| C     | -2.960095 | -2.088197 | -1.250014 |
| O     | -3.010396 | -3.159004 | -1.699525 |
| Mg    | 3.885282  | 0.203998  | -0.484710 |
| S     | 4.361377  | 1.862249  | 1.516960  |
| O     | 4.999745  | 1.826444  | 2.818625  |
| O     | 3.149950  | 0.993109  | 1.311203  |
| O     | 5.221786  | 1.636747  | 0.303410  |
| C     | 3.711701  | 3.585305  | 1.310000  |
| F     | 4.625505  | 4.457962  | 1.724460  |
| F     | 2.599737  | 3.724173  | 2.030096  |
| F     | 3.436981  | 3.816705  | 0.026674  |
| S     | 5.246299  | -2.058641 | -0.837557 |
| O     | 4.796731  | -1.060156 | -1.875075 |
| O     | 5.004685  | -3.461458 | -1.115445 |
| O     | 4.769276  | -1.502612 | 0.472435  |
| C     | 7.079299  | -1.851344 | -0.784158 |
| F     | 7.602424  | -2.261853 | -1.936674 |
| F     | 7.574187  | -2.577379 | 0.214929  |
| F     | 7.382757  | -0.568357 | -0.592052 |
| B1-Mn |           |           |           |
| Mn    | -1.178190 | -0.030584 | -0.097360 |
| O     | -0.678971 | -1.777972 | 2.234057  |
| O     | -0.890935 | 1.964261  | 2.066222  |
| N     | -1.007896 | 1.204638  | -1.810052 |
| N     | -0.933852 | -1.432084 | -1.666292 |
| C     | -0.833118 | -1.148951 | 1.256979  |
| C     | -0.964747 | 1.242201  | 1.147375  |
| C     | -1.205374 | 2.543923  | -1.882834 |
| C     | -0.737065 | 3.288504  | -2.966361 |
| H     | -0.909108 | 4.362072  | -2.977001 |
| C     | -0.083596 | 2.654873  | -4.013321 |
| H     | 0.292191  | 3.222134  | -4.861443 |
| C     | 0.049612  | 1.276106  | -3.975036 |
| H     | 0.523612  | 0.754301  | -4.799150 |
| C     | -0.429328 | 0.573885  | -2.868783 |
| C     | -0.389914 | -0.888194 | -2.789731 |
| C     | 0.128151  | -1.677528 | -3.816491 |
| H     | 0.577265  | -1.221053 | -4.691394 |
| C     | 0.070912  | -3.057524 | -3.706854 |
| H     | 0.478028  | -3.691089 | -4.491165 |
| C     | -0.548453 | -3.609754 | -2.595165 |
| H     | -0.663096 | -4.685973 | -2.490749 |
| C     | -1.057746 | -2.780520 | -1.594677 |
| C     | -1.982136 | 3.230066  | -0.824051 |
| C     | -1.343420 | 4.140700  | 0.035860  |
| C     | -2.108772 | 4.819457  | 0.984402  |
| H     | -1.610258 | 5.510689  | 1.665975  |
| C     | -3.485084 | 4.616654  | 1.102288  |
| C     | -4.098893 | 3.720239  | 0.222130  |
| H     | -5.177725 | 3.566187  | 0.282247  |
| C     | -3.376044 | 3.031613  | -0.752804 |
| C     | 0.142146  | 4.341764  | -0.017620 |
| H     | 0.510366  | 4.797241  | 0.908287  |
| H     | 0.442003  | 4.998025  | -0.846399 |
| H     | 0.678127  | 3.393347  | -0.161502 |
| C     | -4.279871 | 5.322900  | 2.157018  |
| H     | -5.310693 | 5.507707  | 1.833315  |
| H     | -3.827504 | 6.282924  | 2.430650  |
| H     | -4.338465 | 4.724132  | 3.076612  |
| C     | -4.094593 | 2.169539  | -1.749314 |
| H     | -5.132241 | 1.996255  | -1.444845 |
| H     | -3.618454 | 1.191887  | -1.891639 |
| H     | -4.116371 | 2.650987  | -2.737648 |
| C     | -1.804439 | -3.391996 | -0.470002 |
| C     | -1.126947 | -4.171175 | 0.485818  |
| C     | -1.864484 | -4.781025 | 1.500006  |
| H     | -1.336681 | -5.367643 | 2.253818  |
| C     | -3.251410 | -4.639312 | 1.590853  |
| C     | -3.902604 | -3.881007 | 0.614504  |
| H     | -4.988598 | -3.779342 | 0.652299  |
| C     | -3.207006 | -3.264820 | -0.427456 |
| C     | 0.367266  | -4.299784 | 0.459624  |
| H     | 0.738100  | -4.749008 | 1.387300  |
| H     | 0.858347  | -3.323103 | 0.343630  |
| H     | 0.717047  | -4.926281 | -0.372099 |
| C     | -4.015450 | -5.267811 | 2.715239  |
| H     | -3.584261 | -6.231802 | 3.009673  |
| H     | -5.067161 | -5.427453 | 2.451941  |
| H     | -4.001760 | -4.629533 | 3.609649  |
| C     | -3.962830 | -2.559554 | -1.515545 |
| H     | -3.529011 | -1.587305 | -1.778317 |
| H     | -5.006350 | -2.394577 | -1.226926 |
| H     | -3.966180 | -3.157695 | -2.438257 |
| C     | -2.935641 | -0.086342 | 0.315796  |
| O     | -4.027520 | -0.107045 | 0.728836  |
| Mg    | 1.656689  | 0.055394  | 0.356154  |
| S     | 3.048826  | -0.096631 | -1.915053 |
| O     | 2.996386  | -0.178596 | -3.363046 |
| O     | 2.512089  | -1.250454 | -1.118317 |
| O     | 2.507040  | 1.141895  | -1.257156 |
| C     | 4.835982  | -0.061712 | -1.460742 |
| F     | 5.430771  | -1.179293 | -1.868464 |
| F     | 4.941213  | 0.033478  | -0.129513 |
| F     | 5.427413  | 0.988446  | -2.023271 |
| S     | 2.992230  | 0.320045  | 2.641426  |
| O     | 2.412012  | 1.420156  | 1.798208  |
| O     | 4.373636  | 0.450143  | 3.068282  |
| O     | 2.590443  | -0.957147 | 1.955889  |
| C     | 1.991120  | 0.347544  | 4.191193  |
| F     | 2.207660  | 1.495278  | 4.832359  |
| F     | 2.356831  | -0.670230 | 4.969483  |
| F     | 0.696989  | 0.240283  | 3.903645  |
| B1-O1 |           |           |           |
| Mn    | 1.410245  | 0.804130  | -0.627015 |
| O     | 0.632708  | -1.763610 | -1.846183 |
| O     | -1.471021 | 0.362002  | -0.420060 |

|    |           |           |           |       |           |           |           |
|----|-----------|-----------|-----------|-------|-----------|-----------|-----------|
| N  | 1.762869  | 2.592518  | 0.399516  | C     | -0.823595 | -2.775727 | 3.703461  |
| N  | 3.457398  | 0.633741  | -0.187732 | F     | 0.253664  | -3.558021 | 3.669416  |
| C  | 1.081045  | -0.817088 | -1.322883 | F     | -1.895566 | -3.485168 | 3.349961  |
| C  | -0.307286 | 0.671092  | -0.420253 | F     | -0.993244 | -2.304099 | 4.935997  |
| C  | 0.851995  | 3.554274  | 0.713080  | S     | -4.551444 | -1.525287 | -0.854759 |
| C  | 1.234142  | 4.755742  | 1.306534  | O     | -4.392416 | -0.657211 | 0.364207  |
| H  | 0.465285  | 5.489307  | 1.537681  | O     | -5.697973 | -2.412410 | -0.908900 |
| C  | 2.570508  | 5.000122  | 1.594590  | O     | -3.191309 | -2.125299 | -1.089957 |
| H  | 2.882499  | 5.933944  | 2.055949  | C     | -4.778737 | -0.328017 | -2.243335 |
| C  | 3.498540  | 4.022794  | 1.282459  | F     | -5.944770 | 0.297284  | -2.089534 |
| H  | 4.548573  | 4.184419  | 1.501823  | F     | -4.779550 | -0.992279 | -3.397255 |
| C  | 3.074977  | 2.831636  | 0.688900  | F     | -3.794773 | 0.567365  | -2.247515 |
| C  | 4.009712  | 1.761540  | 0.348833  |       |           |           |           |
| C  | 5.383484  | 1.883341  | 0.566012  | B1-O2 |           |           |           |
| H  | 5.796123  | 2.795213  | 0.984077  | Mn    | 1.952122  | 0.115102  | -0.885998 |
| C  | 6.223517  | 0.831913  | 0.243376  | O     | 1.191023  | 2.425754  | -2.574133 |
| H  | 7.296099  | 0.910191  | 0.403704  | O     | 0.750555  | -1.227158 | -3.234464 |
| C  | 5.660445  | -0.326588 | -0.275404 | N     | 3.235052  | -1.424568 | -0.303264 |
| H  | 6.275290  | -1.188633 | -0.523361 | N     | 3.412113  | 1.123819  | 0.222305  |
| C  | 4.283631  | -0.407867 | -0.476427 | C     | 1.504493  | 1.554063  | -1.861165 |
| C  | -0.595308 | 3.348095  | 0.445139  | C     | 1.243428  | -0.762227 | -2.281685 |
| C  | -1.421406 | 2.873345  | 1.483799  | C     | 3.009028  | -2.761927 | -0.376502 |
| C  | -2.787505 | 2.734053  | 1.244158  | C     | 4.061037  | -3.672909 | -0.312910 |
| H  | -3.426893 | 2.352425  | 2.043133  | H     | 3.842480  | -4.735694 | -0.385964 |
| C  | -3.357220 | 3.069145  | 0.010699  | C     | 5.363253  | -3.216796 | -0.135765 |
| C  | -2.519735 | 3.561951  | -0.990748 | H     | 6.195481  | -3.915608 | -0.096480 |
| H  | -2.948237 | 3.838773  | -1.956018 | C     | 5.578748  | -1.858393 | 0.039736  |
| C  | -1.146567 | 3.727513  | -0.790565 | H     | 6.578722  | -1.482838 | 0.234420  |
| C  | -0.836896 | 2.518848  | 2.817127  | C     | 4.494083  | -0.983438 | -0.027502 |
| H  | -0.395891 | 3.396153  | 3.310773  | C     | 4.591021  | 0.444033  | 0.280044  |
| H  | -0.035326 | 1.774182  | 2.724435  | C     | 5.773318  | 1.059013  | 0.693445  |
| H  | -1.596795 | 2.104572  | 3.487086  | H     | 6.705735  | 0.503221  | 0.713156  |
| C  | -4.832168 | 2.933179  | -0.214020 | C     | 5.740290  | 2.385207  | 1.095849  |
| H  | -5.087406 | 2.989446  | -1.278022 | H     | 6.650559  | 2.886035  | 1.416779  |
| H  | -5.385363 | 3.733000  | 0.297714  | C     | 4.517844  | 3.048194  | 1.123911  |
| H  | -5.216890 | 1.984883  | 0.179363  | H     | 4.440787  | 4.069657  | 1.488905  |
| C  | -0.303654 | 4.359454  | -1.857569 | C     | 3.363464  | 2.396468  | 0.695619  |
| H  | -0.688361 | 4.136453  | -2.858972 | C     | 1.601096  | -3.222985 | -0.437942 |
| H  | 0.742675  | 4.037887  | -1.816604 | C     | 1.085142  | -3.836289 | -1.592742 |
| H  | -0.301311 | 5.454107  | -1.750822 | C     | -0.263290 | -4.200488 | -1.612040 |
| C  | 3.739717  | -1.692706 | -0.983713 | H     | -0.672043 | -4.650613 | -2.518444 |
| C  | 3.215569  | -2.627925 | -0.070613 | C     | -1.100469 | -3.999232 | -0.512104 |
| C  | 2.794952  | -3.867978 | -0.549112 | C     | -0.544169 | -3.451225 | 0.647897  |
| H  | 2.381610  | -4.591153 | 0.156509  | H     | -1.169320 | -3.320400 | 1.533350  |
| C  | 2.885417  | -4.204464 | -1.902380 | C     | 0.794714  | -3.066536 | 0.709070  |
| C  | 3.422147  | -3.263143 | -2.783797 | C     | 1.947631  | -4.091461 | -2.792761 |
| H  | 3.500333  | -3.508014 | -3.844524 | H     | 2.540620  | -5.008995 | -2.671867 |
| C  | 3.856477  | -2.010708 | -2.348359 | H     | 2.659085  | -3.277699 | -2.976415 |
| C  | 3.098864  | -2.289540 | 1.383755  | H     | 1.339022  | -4.216282 | -3.694933 |
| H  | 4.079077  | -2.079905 | 1.835023  | C     | -2.554144 | -4.354741 | -0.577340 |
| H  | 2.637430  | -3.107963 | 1.947758  | H     | -3.140496 | -3.543339 | -1.031031 |
| H  | 2.483289  | -1.393423 | 1.539571  | H     | -2.974023 | -4.532465 | 0.419033  |
| C  | 2.387560  | -5.526535 | -2.399460 | H     | -2.726219 | -5.248246 | -1.189149 |
| H  | 2.510717  | -6.316177 | -1.649070 | C     | 1.358542  | -2.531322 | 1.991452  |
| H  | 2.903918  | -5.837878 | -3.314745 | H     | 0.652081  | -2.666178 | 2.817058  |
| H  | 1.315467  | -5.480311 | -2.637562 | H     | 1.590450  | -1.459095 | 1.924543  |
| C  | 4.413013  | -1.015741 | -3.322328 | H     | 2.296680  | -3.033323 | 2.263833  |
| H  | 5.484040  | -0.833076 | -3.158494 | C     | 2.034826  | 3.047416  | 0.801260  |
| H  | 3.914910  | -0.040080 | -3.234184 | C     | 1.684540  | 4.116364  | -0.042302 |
| H  | 4.292542  | -1.362050 | -4.354403 | C     | 0.390086  | 4.635570  | 0.036668  |
| C  | 1.384945  | 1.474754  | -2.295512 | H     | 0.104730  | 5.438208  | -0.645669 |
| O  | 1.293122  | 1.807755  | -3.413210 | C     | -0.549167 | 4.145529  | 0.947053  |
| Mg | -2.367260 | -1.162694 | 0.578270  | C     | -0.150008 | 3.133025  | 1.824064  |
| S  | -0.589004 | -1.372964 | 2.528604  | H     | -0.857032 | 2.754917  | 2.565666  |
| O  | 0.586986  | -0.660714 | 2.996386  | C     | 1.130046  | 2.581751  | 1.777210  |
| O  | -0.525800 | -2.038979 | 1.183305  | C     | 2.661108  | 4.687095  | -1.026925 |
| O  | -1.902599 | -0.638699 | 2.552164  | H     | 3.343807  | 5.400315  | -0.543751 |

H 2.143032 5.226300 -1.827313  
H 3.287593 3.916352 -1.490856  
C -1.936286 4.708460 1.003344  
H -2.319755 4.937512 0.001930  
H -1.966412 5.645275 1.576988  
H -2.634120 4.012483 1.484016  
C 1.533060 1.535429 2.772402  
H 2.421957 1.843736 3.339981  
H 1.790362 0.582006 2.291731  
H 0.728692 1.343212 3.489506  
C 0.478660 0.052598 0.035126  
O -0.604617 0.021416 0.549843  
Mg -2.580500 0.115409 0.215658  
S -2.602516 0.791663 -2.329570  
O -1.715277 1.100160 -3.432097  
O -2.597177 1.711921 -1.136761  
O -2.567632 -0.599516 -1.758549  
C -4.320062 0.948247 -2.985930  
F -4.533491 2.198875 -3.387714  
F -5.194132 0.638605 -2.024331  
F -4.483007 0.117039 -4.012006  
S -3.622663 -0.606166 2.526948  
O -3.293520 0.790552 2.070089  
O -4.904509 -0.823407 3.169472  
O -3.254664 -1.495880 1.371651  
C -2.339992 -0.989204 3.800878  
F -1.130787 -0.686636 3.332151  
F -2.384916 -2.289143 4.089920  
F -2.578276 -0.278747 4.900289

B1-C1

Mn 1.791152 0.357422 -0.228574  
O 3.122869 -1.075035 -2.438765  
O 0.212756 1.175151 -2.584282  
N 0.305595 0.659915 1.180812  
N 2.440552 -0.830513 1.356527  
C 2.646795 -0.541088 -1.508823  
C 0.792544 0.890355 -1.606197  
C -0.728696 1.547624 1.111269  
C -1.921399 1.319364 1.794504  
H -2.732229 2.038302 1.702307  
C -2.045325 0.204225 2.632307  
H -2.957947 0.036008 3.206072  
C -0.937538 -0.618316 2.812314  
H -0.986959 -1.453090 3.504984  
C 0.226764 -0.363481 2.085212  
C 1.440759 -1.153300 2.227698  
C 1.595537 -2.139586 3.204215  
H 0.777408 -2.383061 3.875447  
C 2.808903 -2.795500 3.318479  
H 2.951733 -3.568915 4.069280  
C 3.851084 -2.417526 2.476106  
H 4.834676 -2.873832 2.561123  
C 3.651070 -1.429738 1.515902  
C -0.539786 2.807664 0.357136  
C -1.385972 3.142600 -0.717037  
C -1.178635 4.352799 -1.385359  
H -1.817872 4.597412 -2.235217  
C -0.180778 5.248424 -1.004219  
C 0.614594 4.915445 0.097861  
H 1.378884 5.617001 0.437160  
C 0.452256 3.718548 0.791780  
C -2.483892 2.231194 -1.179940  
H -3.385923 2.322649 -0.557737  
H -2.183795 1.178307 -1.157729  
H -2.780678 2.471891 -2.207021  
C 0.029236 6.537685 -1.736259

H -0.066199 7.401167 -1.064977  
H -0.693281 6.663320 -2.549933  
H 1.035975 6.593314 -2.170817  
C 1.278327 3.459372 2.017654  
H 1.927357 2.581249 1.909574  
H 0.644685 3.268515 2.895002  
H 1.915957 4.320400 2.245505  
C 4.791466 -0.983137 0.679661  
C 5.309981 -1.824851 -0.317987  
C 6.401201 -1.382080 -1.071245  
H 6.789780 -2.025911 -1.862126  
C 6.997940 -0.141621 -0.846089  
C 6.484761 0.661547 0.178654  
H 6.949819 1.627159 0.386011  
C 5.397651 0.261133 0.952699  
C 4.706496 -3.170469 -0.591643  
H 5.048358 -3.922442 0.133400  
H 4.985511 -3.530548 -1.588003  
H 3.610890 -3.153325 -0.534634  
C 8.160139 0.322571 -1.669362  
H 8.490513 -0.448496 -2.373918  
H 9.017484 0.593441 -1.039635  
H 7.907662 1.218923 -2.251306  
C 4.927478 1.119206 2.089655  
H 3.844142 1.292438 2.060899  
H 5.424129 2.095510 2.078852  
H 5.142884 0.646290 3.058508  
C 2.868377 1.777752 -0.348314  
O 3.547414 2.716370 -0.532836  
Mg -3.191903 -1.249581 0.659959

S -1.187157 -2.448083 -0.585063  
O 0.124187 -2.942380 -0.207065  
O -1.453550 -0.977103 -0.433481  
O -2.391063 -3.119048 0.020408  
C -1.322168 -2.704738 -2.404927  
F -0.345376 -2.019508 -2.999021  
F -2.501049 -2.264048 -2.838260  
F -1.197244 -3.998204 -2.687963  
S -5.717676 -0.982478 -0.063694  
O -5.194995 -1.683528 1.162799  
O -6.809079 -1.602542 -0.786894  
O -4.491723 -0.577373 -0.835474  
C -6.351574 0.622808 0.593729  
F -7.416649 0.407124 1.358690  
F -6.677219 1.423284 -0.416498  
F -5.392991 1.203963 1.324232

B1-C2

Mn 1.763471 0.481417 -0.316313  
O 3.180856 -0.912089 -2.498951  
O 0.563958 1.619329 -2.758370  
N 0.211091 0.854505 0.991172  
N 2.143522 -0.876611 1.211805  
C 2.664286 -0.405387 -1.576778  
C 0.985567 1.214150 -1.742768  
C -0.675491 1.895460 0.968393  
C -1.879891 1.842693 1.660995  
H -2.561968 2.686681 1.600650  
C -2.189773 0.722622 2.445175  
H -3.121076 0.674734 3.007211  
C -1.239065 -0.289404 2.558178  
H -1.421487 -1.133623 3.218241  
C -0.035046 -0.188200 1.847395  
C 1.045378 -1.148967 1.976751  
C 0.993693 -2.245398 2.841843  
H 0.094897 -2.451876 3.415709  
C 2.100654 -3.066346 2.958310



|       |           |           |           |    |           |           |           |
|-------|-----------|-----------|-----------|----|-----------|-----------|-----------|
| H     | 2.082331  | -3.931025 | 3.617204  | O  | -1.381007 | 0.325898  | -2.802233 |
| C     | 3.251213  | -2.737190 | 2.244938  | N  | -1.526112 | -1.378724 | 0.876011  |
| H     | 4.161753  | -3.322500 | 2.350206  | N  | -4.041534 | -0.738461 | 1.247123  |
| C     | 3.258173  | -1.634760 | 1.395455  | C  | -4.235936 | -0.226290 | -1.653571 |
| C     | -0.317561 | 3.122737  | 0.223142  | C  | -1.905586 | -0.102101 | -1.841315 |
| C     | -1.057507 | 3.504259  | -0.909157 | C  | -0.200950 | -1.598848 | 0.676867  |
| C     | -0.705180 | 4.681168  | -1.575224 | C  | 0.565045  | -2.351387 | 1.562001  |
| H     | -1.261369 | 4.964585  | -2.470164 | H  | 1.622650  | -2.490888 | 1.350441  |
| C     | 0.342044  | 5.491471  | -1.137129 | C  | -0.023673 | -2.891538 | 2.701391  |
| C     | 1.039239  | 5.105770  | 0.013651  | H  | 0.557488  | -3.487726 | 3.400641  |
| H     | 1.847039  | 5.737860  | 0.386868  | C  | -1.361239 | -2.629893 | 2.938221  |
| C     | 0.725611  | 3.940877  | 0.709838  | H  | -1.840781 | -3.017372 | 3.831492  |
| C     | -2.183862 | 2.660027  | -1.428823 | C  | -2.088554 | -1.864306 | 2.023194  |
| H     | -3.111244 | 2.816331  | -0.859208 | C  | -3.481774 | -1.496410 | 2.237198  |
| H     | -1.954489 | 1.588026  | -1.377131 | C  | -4.185261 | -1.847046 | 3.390851  |
| H     | -2.403858 | 2.902677  | -2.474257 | H  | -3.721791 | -2.467392 | 4.151589  |
| C     | 0.710041  | 6.746996  | -1.865784 | C  | -5.478251 | -1.383553 | 3.566228  |
| H     | 0.636707  | 7.626378  | -1.212583 | H  | -6.043926 | -1.642690 | 4.457972  |
| H     | 0.061075  | 6.917281  | -2.731606 | C  | -6.017264 | -0.542475 | 2.598801  |
| H     | 1.746841  | 6.713717  | -2.225190 | H  | -7.002249 | -0.100686 | 2.729288  |
| C     | 1.443206  | 3.616945  | 1.987195  | C  | -5.283411 | -0.221298 | 1.458143  |
| H     | 2.272701  | 4.311733  | 2.157404  | C  | 0.488042  | -0.967042 | -0.476952 |
| H     | 1.852016  | 2.598747  | 1.994999  | C  | 0.775625  | 0.408035  | -0.426201 |
| H     | 0.765655  | 3.688785  | 2.849907  | C  | 1.530249  | 0.979103  | -1.469630 |
| C     | 4.514633  | -1.239337 | 0.715118  | H  | 1.689981  | 2.063096  | -1.472535 |
| C     | 5.057421  | -2.048021 | -0.297400 | C  | 1.964357  | 0.218206  | -2.574264 |
| C     | 6.249749  | -1.650678 | -0.909154 | C  | 1.680128  | -1.148873 | -2.575814 |
| H     | 6.657303  | -2.264380 | -1.714312 | H  | 2.032566  | -1.763808 | -3.404451 |
| C     | 6.923152  | -0.490249 | -0.528336 | C  | 0.955562  | -1.754401 | -1.546340 |
| C     | 6.381770  | 0.276340  | 0.509955  | C  | 0.297035  | 1.257634  | 0.709365  |
| H     | 6.904042  | 1.176747  | 0.838830  | H  | 0.595364  | 0.843928  | 1.681852  |
| C     | 5.194802  | -0.079859 | 1.146769  | H  | -0.801164 | 1.310648  | 0.715169  |
| C     | 4.372819  | -3.305891 | -0.743315 | H  | 0.680862  | 2.279392  | 0.636828  |
| H     | 4.573335  | -4.141387 | -0.058035 | C  | 2.693407  | 0.862493  | -3.711063 |
| H     | 4.721935  | -3.610771 | -1.736039 | H  | 3.360030  | 0.155561  | -4.215675 |
| H     | 3.283041  | -3.191666 | -0.790370 | H  | 3.282598  | 1.727470  | -3.384021 |
| C     | 8.199383  | -0.077579 | -1.195016 | H  | 1.978456  | 1.230173  | -4.459469 |
| H     | 8.457887  | -0.746706 | -2.022909 | C  | 0.710674  | -3.229554 | -1.577586 |
| H     | 9.040413  | -0.080731 | -0.488773 | H  | 0.902311  | -3.640664 | -2.573977 |
| H     | 8.133968  | 0.942812  | -1.594098 | H  | -0.317366 | -3.480954 | -1.289468 |
| C     | 4.694728  | 0.728924  | 2.307467  | H  | 1.373309  | -3.752690 | -0.874558 |
| H     | 3.646001  | 1.029597  | 2.189327  | C  | -5.845824 | 0.773038  | 0.514229  |
| H     | 5.290798  | 1.638540  | 2.439078  | C  | -5.206355 | 2.022099  | 0.350821  |
| H     | 4.751244  | 0.154848  | 3.243325  | C  | -5.804657 | 2.982488  | -0.463820 |
| C     | 2.978143  | 1.785814  | -0.229377 | H  | -5.312625 | 3.949872  | -0.580706 |
| O     | 3.767461  | 2.651071  | -0.275819 | C  | -7.014486 | 2.745773  | -1.123502 |
| Mg    | -2.885079 | -1.003503 | 0.481761  | C  | -7.618442 | 1.499310  | -0.957122 |
| S     | -1.111820 | -2.678756 | -0.547785 | H  | -8.549400 | 1.283709  | -1.484317 |
| O     | 0.261187  | -3.131135 | -0.440566 | C  | -7.059715 | 0.508568  | -0.147617 |
| O     | -1.361905 | -1.250541 | -0.946379 | C  | -3.900885 | 2.331617  | 1.019019  |
| O     | -2.032723 | -2.919606 | 0.622435  | H  | -3.879071 | 2.010277  | 2.068394  |
| C     | -1.878787 | -3.650722 | -1.917085 | H  | -3.686526 | 3.405403  | 0.984879  |
| F     | -1.234315 | -3.401846 | -3.053457 | H  | -3.070841 | 1.807780  | 0.517685  |
| F     | -3.157680 | -3.290558 | -2.043554 | C  | -7.639038 | 3.803601  | -1.980201 |
| F     | -1.808972 | -4.948273 | -1.636781 | H  | -6.930170 | 4.194748  | -2.721063 |
| S     | -5.471809 | -0.692873 | 0.024356  | H  | -7.966547 | 4.663479  | -1.380288 |
| O     | -4.825161 | -1.240103 | 1.270359  | H  | -8.514412 | 3.423442  | -2.518096 |
| O     | -6.613674 | -1.402610 | -0.515841 | C  | -7.721455 | -0.835459 | -0.059912 |
| O     | -4.324291 | -0.389178 | -0.901629 | H  | -6.995045 | -1.652253 | -0.168914 |
| C     | -6.084730 | 0.972347  | 0.533900  | H  | -8.474864 | -0.949080 | -0.847143 |
| F     | -7.036963 | 0.832350  | 1.450953  | H  | -8.230843 | -0.995084 | 0.899662  |
| F     | -6.570872 | 1.609111  | -0.526815 | C  | -3.086474 | -2.389292 | -1.191205 |
| F     | -5.074983 | 1.677801  | 1.048520  | O  | -3.172806 | -3.453524 | -1.679789 |
|       |           |           |           | Mg | 3.647452  | 0.594162  | -0.454415 |
| B1-C3 |           |           |           | S  | 4.580859  | -1.873608 | -0.751277 |
| Mn    | -2.948342 | -0.741818 | -0.533802 | O  | 4.325346  | -3.127578 | -1.434232 |
| O     | -4.982945 | 0.018628  | -2.524658 | O  | 3.563316  | -1.395754 | 0.248100  |

O 4.921311 -0.668469 -1.581166  
C 6.094234 -2.125138 0.271907  
F 5.875157 -3.081326 1.170982  
F 6.388519 -0.984306 0.902647  
F 7.113989 -2.471956 -0.508620  
S 5.044851 2.456337 0.852965  
O 4.976292 2.251751 -0.633228  
O 6.347690 2.681182 1.449339  
O 4.182124 1.376739 1.444439  
C 4.073061 4.000331 1.125490  
F 4.718749 5.034466 0.593320  
F 3.906035 4.201614 2.429912  
F 2.877508 3.880297 0.540604

#### B1-C4

Mn -2.899215 -0.693672 0.788227  
O -5.157927 -0.015155 2.561454  
O -1.796456 -1.076998 3.496851  
N -1.541107 -1.889953 -0.249115  
N -3.960112 -1.188538 -0.942244  
C -4.316333 -0.280174 1.787091  
C -2.171426 -0.952300 2.390293  
C -0.222786 -2.081336 0.021543  
C 0.490522 -3.144502 -0.521154  
H 1.538511 -3.262464 -0.258056  
C -0.137728 -4.020848 -1.401824  
H 0.402360 -4.861811 -1.829673  
C -1.453528 -3.774167 -1.755439  
H -1.952616 -4.411002 -2.479353  
C -2.129393 -2.695779 -1.180332  
C -3.478338 -2.301536 -1.570266  
C -4.204922 -2.966678 -2.559306  
H -3.806659 -3.864020 -3.022877  
C -5.435036 -2.465861 -2.951490  
H -6.019619 -2.970401 -3.716982  
C -5.885824 -1.283198 -2.373386  
H -6.820360 -0.824831 -2.688588  
C -5.132016 -0.657302 -1.383675  
C 0.475166 -1.087058 0.874197  
C 0.963785 -1.452578 2.144715  
C 1.626825 -0.500357 2.923837  
H 1.980224 -0.786378 3.914851  
C 1.824887 0.809222 2.481265  
C 1.379076 1.138431 1.184410  
H 1.476442 2.169922 0.833762  
C 0.705756 0.206946 0.367571  
C 0.772331 -2.838639 2.676783  
H 1.510451 -3.530796 2.249732  
H -0.218635 -3.239116 2.434335  
H 0.894755 -2.859718 3.764492  
C 2.501992 1.822106 3.349715  
H 2.559793 2.800912 2.863752  
H 3.522146 1.507731 3.606217  
H 1.962899 1.941676 4.297394  
C 0.321652 0.588407 -1.033085  
H 0.524065 1.648072 -1.223326  
H -0.740213 0.402267 -1.233012  
H 0.884893 -0.003141 -1.769675  
C -5.587225 0.640453 -0.829124  
C -6.731107 0.697571 -0.015703  
C -7.148225 1.938239 0.473962  
H -8.022325 1.979122 1.126128  
C -6.470022 3.117574 0.167538  
C -5.352952 3.037255 -0.671933  
H -4.820129 3.950835 -0.942485  
C -4.903242 1.822302 -1.185557  
C -7.485284 -0.544427 0.356424

H -8.145645 -0.879554 -0.455542  
H -8.115114 -0.371187 1.235998  
H -6.814541 -1.382615 0.582811  
C -6.920915 4.437081 0.714669  
H -7.845365 4.339655 1.294382  
H -7.100341 5.165959 -0.086263  
H -6.160948 4.879828 1.372156  
C -3.753428 1.795588 -2.148943  
H -2.990354 1.058226 -1.870311  
H -3.267522 2.775517 -2.209495  
H -4.091729 1.529443 -3.160620  
C -2.356920 1.012214 0.698134  
O -2.028161 2.137227 0.763569  
Mg 3.464965 0.510180 0.196723  
S 4.928408 2.547886 -0.642234  
O 6.315277 2.910523 -0.860111  
O 4.481274 2.276671 0.767090  
O 4.361052 1.417860 -1.459586  
C 3.924063 4.008750 -1.155325  
F 4.163936 4.286997 -2.433715  
F 4.244832 5.056179 -0.400980  
F 2.626182 3.734449 -1.000827  
S 4.335738 -1.989172 0.298576  
O 3.363774 -1.415833 -0.694008  
O 3.989753 -3.251743 0.925975  
O 4.714545 -0.839752 1.194031  
C 5.862456 -2.303533 -0.689155  
F 5.598535 -3.208493 -1.628488  
F 6.821847 -2.758197 0.112901  
F 6.264931 -1.171610 -1.264325

#### B1-Z1

Mn 1.647535 0.677260 -0.131338  
O 2.583952 -0.747833 -2.537458  
O 0.235125 1.834460 -2.440460  
N 0.313943 1.097812 1.427805  
N 2.301059 -0.621813 1.364522  
C 2.269828 -0.251373 -1.520149  
C 0.723001 1.423656 -1.454068  
C -0.645738 2.062683 1.461983  
C -1.669630 2.045941 2.406948  
H -2.414254 2.838543 2.384623  
C -1.717567 1.040724 3.370292  
H -2.511794 1.013519 4.112885  
C -0.704280 0.095948 3.382288  
H -0.696148 -0.680157 4.141534  
C 0.305396 0.152323 2.416067  
C 1.423890 -0.779593 2.399018  
C 1.609306 -1.746887 3.390394  
H 0.891907 -1.849270 4.198386  
C 2.715715 -2.574139 3.339012  
H 2.872579 -3.339871 4.094981  
C 3.638552 -2.379271 2.315313  
H 4.546583 -2.975216 2.256467  
C 3.423940 -1.392080 1.358416  
C -0.578477 3.201736 0.515170  
C -1.557215 3.358123 -0.482328  
C -1.500770 4.482075 -1.310671  
H -2.253992 4.597481 -2.091767  
C -0.500621 5.445128 -1.181202  
C 0.452628 5.274114 -0.170917  
H 1.227933 6.030117 -0.033170  
C 0.422254 4.181407 0.693658  
C -2.597227 2.307043 -0.736263  
H -3.052246 1.924167 0.187266  
H -2.156031 1.444965 -1.258927  
H -3.405865 2.686184 -1.370922

C -0.446819 6.638643 -2.084435  
 H -0.463616 7.576316 -1.513758  
 H -1.289687 6.655382 -2.783880  
 H 0.478243 6.652491 -2.675762  
 C 1.391929 4.104377 1.836267  
 H 2.166777 4.873372 1.746646  
 H 1.890527 3.129858 1.902416  
 H 0.879923 4.260194 2.796760  
 C 4.481360 -1.138627 0.348107  
 C 4.674170 -2.033187 -0.716979  
 C 5.702707 -1.781931 -1.628807  
 H 5.835443 -2.462005 -2.472058  
 C 6.548261 -0.679697 -1.501016  
 C 6.356336 0.176722 -0.410987  
 H 7.020220 1.033490 -0.280566  
 C 5.346575 -0.039672 0.525509  
 C 3.773908 -3.218370 -0.901363  
 H 3.889862 -3.648470 -1.902496  
 H 2.717059 -2.953728 -0.770245  
 H 3.990915 -4.014160 -0.174932  
 C 7.644948 -0.423945 -2.489268  
 H 7.601107 -1.122853 -3.331867  
 H 8.635423 -0.525703 -2.025511  
 H 7.594884 0.595181 -2.893342  
 C 5.234313 0.846474 1.731010  
 H 4.201789 1.159809 1.928912  
 H 5.843350 1.749711 1.616794  
 H 5.582376 0.324948 2.634358  
 C 2.890440 1.959255 -0.237694  
 O 3.667246 2.815248 -0.445103  
 Mg -2.839435 -0.927528 0.726631  
 S -0.913976 -2.623372 0.032914  
 O 0.277819 -3.211855 0.615558  
 O -0.949544 -1.125949 -0.129211  
 O -2.241350 -2.980182 0.639405  
 C -0.962246 -3.240465 -1.705100  
 F 0.161180 -2.860303 -2.315161  
 F -2.008203 -2.733772 -2.350054  
 F -1.041138 -4.569083 -1.703591  
 S -5.282372 -1.349358 -0.221640  
 O -4.853279 -1.355616 1.221186  
 O -6.066920 -2.473506 -0.695395  
 O -4.054910 -0.968572 -1.000301  
 C -6.377822 0.129562 -0.356736  
 F -7.464378 -0.054011 0.389676  
 F -6.732881 0.303036 -1.627186  
 F -5.727163 1.212629 0.070740

B1-Z2

Mn -2.766354 -0.730642 -0.628527  
 O -4.818979 -2.844865 -0.454579  
 O -1.215485 -3.225079 -0.897775  
 N -1.427180 0.581197 -1.542840  
 N -3.996674 0.866894 -1.179862  
 C -4.066200 -1.947513 -0.525190  
 C -1.768826 -2.191741 -0.812133  
 C -0.070015 0.509927 -1.556083  
 C 0.697327 1.212286 -2.476821  
 H 1.779714 1.105084 -2.459292  
 C 0.071078 2.052259 -3.394972  
 H 0.651930 2.602053 -4.131095  
 C -1.303503 2.203653 -3.324387  
 H -1.812578 2.886293 -3.997982  
 C -2.029965 1.473807 -2.380563  
 C -3.462439 1.646030 -2.165764  
 C -4.223705 2.588249 -2.859395  
 H -3.773765 3.183378 -3.648241

C -5.554341 2.768319 -2.520031  
 H -6.167320 3.493610 -3.049679  
 C -6.075578 2.033328 -1.459732  
 H -7.099019 2.182270 -1.123333  
 C -5.279948 1.102598 -0.796151  
 C 0.580979 -0.301346 -0.497421  
 C 1.276693 -1.485683 -0.820382  
 C 1.865121 -2.225831 0.218755  
 H 2.383887 -3.152756 -0.022546  
 C 1.771114 -1.832263 1.561665  
 C 1.116872 -0.620411 1.846494  
 H 1.084352 -0.261584 2.874665  
 C 0.521817 0.155296 0.842416  
 C 1.382339 -1.966207 -2.234267  
 H 2.190458 -1.453448 -2.771953  
 H 0.456847 -1.781780 -2.790652  
 H 1.594638 -3.038947 -2.264872  
 C 2.389504 -2.645549 2.652203  
 H 2.900631 -2.008471 3.383456  
 H 3.109493 -3.367520 2.254269  
 H 1.617165 -3.203601 3.197035  
 C -0.101103 1.472832 1.186744  
 H -1.182901 1.465307 1.002674  
 H 0.311662 2.281504 0.570412  
 H 0.061702 1.720756 2.240444  
 C -5.817208 0.393057 0.390159  
 C -6.828451 -0.570727 0.242193  
 C -7.326361 -1.205295 1.383687  
 H -8.094539 -1.971496 1.266051  
 C -6.858701 -0.897951 2.661157  
 C -5.876465 0.091197 2.783925  
 H -5.512057 0.363164 3.776358  
 C -5.353256 0.751659 1.674029  
 C -7.358859 -0.942127 -1.110667  
 H -8.079333 -0.200481 -1.483020  
 H -7.876068 -1.907400 -1.077172  
 H -6.563174 -1.012634 -1.862495  
 C -7.392066 -1.597677 3.873524  
 H -8.189378 -2.303255 3.615611  
 H -7.796304 -0.885487 4.604612  
 H -6.603989 -2.159864 4.391766  
 C -4.366753 1.866405 1.862293  
 H -3.500630 1.777516 1.194891  
 H -3.995534 1.895094 2.892516  
 H -4.828689 2.841091 1.648783  
 C -2.529623 -0.694698 1.147618  
 O -2.370457 -0.799927 2.305560  
 Mg 3.197873 0.007871 0.475965

S 5.453016 -1.163860 -0.318308  
 O 6.851027 -0.795080 -0.445017  
 O 4.457298 -0.413813 -1.162247  
 O 4.861393 -1.171592 1.062379  
 C 5.345909 -2.943106 -0.902437  
 F 6.448775 -3.255642 -1.574249  
 F 4.291746 -3.103677 -1.701085  
 F 5.226197 -3.751123 0.148808  
 S 3.389933 2.545504 1.285765  
 O 3.547846 1.320579 2.136727  
 O 2.662520 3.675189 1.832447  
 O 2.983867 2.040628 -0.072125  
 C 5.125848 3.109380 1.026018  
 F 5.661182 3.468637 2.189570  
 F 5.151905 4.140268 0.185625  
 F 5.833230 2.099202 0.507793

B2-Mn

Mn -1.262816 0.316296 -0.122196

O -1.532812 -1.649490 2.054562  
 O -0.456047 1.762877 2.315070  
 N -0.519589 1.604823 -1.592422  
 N -1.105527 -0.934174 -1.780880  
 C -1.401974 -0.950650 1.113394  
 C -0.718003 1.247777 1.284359  
 C -0.326362 2.956205 -1.496613  
 C 0.314187 3.682581 -2.492379  
 H 0.447969 4.752873 -2.348150  
 C 0.741991 3.057355 -3.663016  
 H 1.241559 3.617798 -4.449675  
 C 0.479837 1.711081 -3.805580  
 H 0.768184 1.193663 -4.714538  
 C -0.152327 1.008551 -2.771799  
 C -0.464905 -0.399877 -2.872944  
 C -0.134095 -1.164221 -3.998979  
 H 0.401231 -0.707367 -4.824724  
 C -0.478264 -2.498996 -4.051508  
 H -0.215978 -3.112819 -4.909821  
 C -1.214358 -3.021671 -2.988131  
 H -1.572020 -4.049235 -3.007522  
 C -1.540369 -2.229580 -1.895417  
 C -0.869944 3.719303 -0.342904  
 C -0.007984 4.200565 0.656862  
 C -0.532072 4.992550 1.678886  
 H 0.136931 5.350397 2.463882  
 C -1.890114 5.312324 1.739338  
 C -2.724205 4.838859 0.722322  
 H -3.784611 5.098208 0.736607  
 C -2.234812 4.064835 -0.331813  
 C 1.444350 3.828451 0.653572  
 H 2.007420 4.359046 -0.127230  
 H 1.582982 2.755970 0.461430  
 H 1.915844 4.060997 1.615179  
 C -2.441204 6.118870 2.875456  
 H -3.356442 6.650639 2.590645  
 H -1.715802 6.855477 3.240691  
 H -2.697893 5.478441 3.731037  
 C -3.138350 3.677417 -1.464604  
 H -4.191800 3.820190 -1.199704  
 H -3.004542 2.631739 -1.768041  
 H -2.936922 4.292656 -2.353784  
 C -2.452435 -2.811698 -0.877598  
 C -1.989181 -3.800618 0.005401  
 C -2.890362 -4.397694 0.888222  
 H -2.523089 -5.153568 1.585059  
 C -4.236663 -4.031024 0.924877  
 C -4.678020 -3.054224 0.026503  
 H -5.732087 -2.769865 0.021098  
 C -3.814656 -2.451464 -0.889700  
 C -0.537883 -4.175046 0.035852  
 H -0.266768 -4.854276 -0.784846  
 H -0.276720 -4.676310 0.974935  
 H 0.107303 -3.291924 -0.061529  
 C -5.177233 -4.643938 1.917086  
 H -4.863747 -5.654434 2.203894  
 H -6.200647 -4.699491 1.527669  
 H -5.222606 -4.050795 2.841329  
 C -4.354545 -1.500023 -1.916112  
 H -3.736161 -0.599836 -2.019834  
 H -5.373057 -1.183084 -1.665798  
 H -4.392158 -1.973895 -2.907936  
 C -2.979626 0.769508 0.063675  
 O -4.073718 1.025679 0.422696  
 Mg 1.232209 -0.409837 0.296802  
 S 2.927141 -0.453342 -1.840732  
 O 2.958756 -0.407896 -3.294440

O 2.198392 -1.599360 -1.198863  
 O 2.521496 0.776900 -1.098549  
 C 4.680529 -0.734103 -1.343705  
 F 5.106605 -1.900162 -1.833564  
 F 4.785355 -0.758308 -0.013355  
 F 5.447749 0.246695 -1.822653  
 S 2.592429 -1.097099 2.538513  
 O 2.503166 0.253065 1.889999  
 O 3.917445 -1.583917 2.892627  
 O 1.705055 -2.003281 1.747687  
 C 1.729975 -0.883949 4.154702  
 F 0.467617 -0.510323 3.972964  
 F 2.363788 0.046409 4.874218  
 F 1.751200 -2.039798 4.824507

B2-O1

Mn 1.708269 0.782600 -0.659135  
 O 0.737036 -1.721248 -1.859757  
 O -1.207671 0.574299 -0.715804  
 N 2.098634 2.449127 0.492383  
 N 3.584375 0.343209 0.089582  
 C 1.253558 -0.798707 -1.338422  
 C -0.007204 0.763179 -0.560018  
 C 1.258088 3.503838 0.744366  
 C 1.690573 4.659489 1.373040  
 H 0.973190 5.460774 1.539494  
 C 3.016828 4.778213 1.806804  
 H 3.367232 5.682101 2.299650  
 C 3.856992 3.704300 1.613845  
 H 4.883822 3.750446 1.964397  
 C 3.389452 2.548811 0.965967  
 C 4.208441 1.386917 0.749624  
 C 5.542570 1.313895 1.179805  
 H 5.995891 2.166049 1.677676  
 C 6.276260 0.165966 0.978825  
 H 7.308454 0.091624 1.312620  
 C 5.643146 -0.904621 0.334958  
 H 6.168928 -1.841795 0.161394  
 C 4.331573 -0.795652 -0.095333  
 C -0.187440 3.404164 0.409082  
 C -1.071926 2.924727 1.396746  
 C -2.438676 2.885470 1.118504  
 H -3.122833 2.511902 1.884271  
 C -2.952785 3.323537 -0.108072  
 C -2.056287 3.804964 -1.062909  
 H -2.438905 4.154992 -2.023931  
 C -0.680806 3.868035 -0.820309  
 C -0.547868 2.466364 2.724862  
 H -0.045980 3.281170 3.264607  
 H 0.194578 1.663932 2.608680  
 H -1.352158 2.083727 3.360140  
 C -4.428662 3.315683 -0.370523  
 H -4.650425 3.413392 -1.439395  
 H -4.925538 4.152336 0.140746  
 H -4.903675 2.397698 -0.004718  
 C 0.238176 4.464499 -1.844184  
 H -0.141169 4.313275 -2.861463  
 H 1.247347 4.040981 -1.793185  
 H 0.340154 5.549988 -1.698111  
 C 3.745273 -1.980973 -0.774375  
 C 3.057787 -2.949522 -0.020514  
 C 2.605868 -4.104932 -0.657246  
 H 2.067089 -4.853019 -0.072012  
 C 2.816858 -4.324135 -2.021043  
 C 3.508328 -3.351660 -2.746140  
 H 3.684677 -3.504798 -3.812742  
 C 3.980734 -2.183529 -2.145187

C 2.803573 -2.732446 1.440500  
 H 3.734566 -2.738794 2.024938  
 H 2.146295 -3.507073 1.852102  
 H 2.325482 -1.759881 1.620372  
 C 2.284529 -5.553054 -2.692990  
 H 2.313731 -6.425924 -2.029812  
 H 2.846333 -5.795369 -3.602546  
 H 1.234997 -5.419499 -2.991554  
 C 4.723695 -1.159664 -2.951267  
 H 4.336497 -0.146665 -2.772785  
 H 4.645652 -1.365957 -4.024577  
 H 5.792949 -1.134489 -2.698081  
 C 1.972948 1.461721 -2.271429  
 O 1.984091 1.825234 -3.396257  
 Mg -2.342415 -0.632251 0.347219  
 S -1.057059 -1.493500 2.495466  
 O 0.136205 -1.274597 3.291090  
 O -0.901836 -2.015549 1.097554  
 O -2.050244 -0.367392 2.399706  
 C -2.005798 -2.829408 3.340771  
 F -1.288255 -3.951301 3.350695  
 F -3.147358 -3.043507 2.678704  
 F -2.285518 -2.469832 4.591495  
 S -4.643310 -1.107868 -0.877157  
 O -4.388804 -0.157370 0.260492  
 O -5.826963 -1.943831 -0.808157  
 O -3.323261 -1.774538 -1.140565  
 C -4.888318 0.005139 -2.329813  
 F -5.989060 0.732963 -2.147650  
 F -5.017944 -0.727218 -3.433737  
 F -3.839126 0.818088 -2.458963

B2-O2

Mn -1.973450 0.128641 -0.907101  
 O -1.026703 -1.374767 -3.261457  
 O -1.150210 2.203998 -2.837320  
 N -3.347374 1.302084 0.094276  
 N -3.391553 -1.239034 -0.317786  
 C -1.436067 -0.836942 -2.294141  
 C -1.507327 1.425233 -2.024823  
 C -3.184821 2.600432 0.510616  
 C -4.235164 3.338731 1.029702  
 H -4.051075 4.368261 1.330965  
 C -5.501908 2.758700 1.187114  
 H -6.333830 3.333315 1.587634  
 C -5.648874 1.424297 0.870914  
 H -6.598975 0.922465 1.035428  
 C -4.562524 0.703479 0.352929  
 C -4.593647 -0.712529 0.102545  
 C -5.723108 -1.520072 0.305415  
 H -6.665433 -1.065667 0.600725  
 C -5.631926 -2.886240 0.135771  
 H -6.500678 -3.525728 0.273494  
 C -4.370450 -3.434562 -0.142682  
 H -4.225296 -4.512757 -0.176773  
 C -3.274613 -2.609170 -0.322254  
 C -1.826262 3.203225 0.455359  
 C -1.510596 4.174676 -0.510600  
 C -0.211368 4.687795 -0.556733  
 H 0.039106 5.413373 -1.333299  
 C 0.774564 4.281956 0.344090  
 C 0.418380 3.364073 1.336496  
 H 1.164028 3.055536 2.071599  
 C -0.867000 2.828826 1.418955  
 C -2.537565 4.649741 -1.495405  
 H -3.209319 5.396981 -1.049066  
 H -3.171606 3.832362 -1.858446

H -2.063279 5.118325 -2.364897  
 C 2.167621 4.829811 0.269232  
 H 2.886697 4.168717 0.768446  
 H 2.242916 5.813512 0.753890  
 H 2.495026 4.963652 -0.768928  
 C -1.213059 1.898478 2.542020  
 H -0.326009 1.655482 3.139005  
 H -1.643755 0.956468 2.175522  
 H -1.956784 2.346159 3.216626  
 C -1.906930 -3.185855 -0.384418  
 C -1.439749 -3.874442 -1.516028  
 C -0.115822 -4.323794 -1.532923  
 H 0.258921 -4.820811 -2.429980  
 C 0.742035 -4.140930 -0.446674  
 C 0.226862 -3.530296 0.701816  
 H 0.866981 -3.409734 1.579761  
 C -1.084190 -3.059460 0.757197  
 C -2.329249 -4.120106 -2.697887  
 H -2.974918 -4.995695 -2.538123  
 H -1.741399 -4.313091 -3.602142  
 H -2.992055 -3.271274 -2.901471  
 C 2.160905 -4.621863 -0.491543  
 H 2.547224 -4.646657 -1.517222  
 H 2.255068 -5.640864 -0.089707  
 H 2.823649 -3.984825 0.106616  
 C -1.598542 -2.439452 2.021519  
 H -2.615886 -2.778859 2.257625  
 H -1.645044 -1.342399 1.944730  
 H -0.953780 -2.686177 2.871520  
 C -0.537369 0.009104 0.010893  
 O 0.574374 -0.069582 0.497624  
 Mg 2.514598 0.002576 0.296576

S 2.938791 0.359507 -2.282014  
 O 2.227541 0.519959 -3.535149  
 O 2.811704 -0.951689 -1.558394  
 O 2.765144 1.420851 -1.229329  
 C 4.734487 0.454191 -2.694128  
 F 5.045646 -0.502938 -3.565009  
 F 5.455974 0.288533 -1.581877  
 F 5.012087 1.643809 -3.222808  
 S 3.472478 -0.426104 2.723766  
 O 3.268029 -1.438562 1.630930  
 O 4.717353 -0.472883 3.467714  
 O 3.059158 0.892455 2.130686  
 C 2.140546 -0.820098 3.939600  
 F 0.953546 -0.803892 3.337041  
 F 2.150351 0.083521 4.918027  
 F 2.356622 -2.032663 4.447684

B2-C1

Mn 1.873853 0.591521 -0.272182  
 O 2.954830 -0.984583 -2.518889  
 O 0.841277 1.965284 -2.658293  
 N 0.286155 0.723773 0.883104  
 N 2.330278 -0.803400 1.207692  
 C 2.561829 -0.396269 -1.576327  
 C 1.188185 1.468497 -1.648807  
 C -0.732750 1.681576 0.849745  
 C -1.938336 1.496335 1.480444  
 H -2.692389 2.276322 1.400967  
 C -2.187705 0.332367 2.280679  
 H -3.071158 0.274422 2.917551  
 C -1.071997 -0.480856 2.532157  
 H -1.156444 -1.298251 3.244513  
 C 0.126945 -0.280048 1.857641  
 C 1.278058 -1.108234 2.039865  
 C 1.346715 -2.160721 2.970824

H 0.488295 -2.384380 3.598785  
 C 2.502180 -2.897232 3.087193  
 H 2.573251 -3.715561 3.800403  
 C 3.598884 -2.544780 2.286741  
 H 4.547444 -3.070585 2.374125  
 C 3.495611 -1.503741 1.379944  
 C -0.481958 2.986577 0.191698  
 C -1.247810 3.388711 -0.917954  
 C -1.019930 4.647831 -1.481964  
 H -1.603003 4.944899 -2.355879  
 C -0.058720 5.521790 -0.976834  
 C 0.668881 5.115725 0.148391  
 H 1.400661 5.798032 0.586027  
 C 0.465651 3.876146 0.751689  
 C -2.271253 2.479044 -1.531793  
 H -3.216900 2.470106 -0.970174  
 H -1.922494 1.438949 -1.567968  
 H -2.507895 2.791745 -2.555705  
 C 0.185573 6.859504 -1.605844  
 H 0.071591 7.675747 -0.880245  
 H -0.506890 7.048611 -2.433740  
 H 1.206590 6.938829 -2.002768  
 C 1.208867 3.533058 2.007482  
 H 1.903837 2.694771 1.860257  
 H 0.521849 3.223545 2.807719  
 H 1.785196 4.391415 2.370445  
 C 4.707377 -1.112163 0.612866  
 C 5.167291 -1.908247 -0.449257  
 C 6.327852 -1.523491 -1.128938  
 H 6.671423 -2.131008 -1.968442  
 C 7.054666 -0.389902 -0.765077  
 C 6.606053 0.355106 0.331005  
 H 7.173177 1.231664 0.650842  
 C 5.452281 0.009323 1.031780  
 C 4.451274 -3.164065 -0.849557  
 H 4.749169 -4.013034 -0.217577  
 H 4.681295 -3.436540 -1.885624  
 H 3.363235 -3.069560 -0.759731  
 C 8.281305 0.022044 -1.520943  
 H 8.599431 -0.751844 -2.228502  
 H 9.122155 0.231302 -0.847454  
 H 8.108238 0.941584 -2.096636  
 C 5.045837 0.793662 2.243740  
 H 3.976275 1.038652 2.238825  
 H 5.606651 1.732045 2.315061  
 H 5.233678 0.223951 3.165318  
 C 3.192714 1.770186 -0.198649  
 O 3.988651 2.637800 -0.252954  
 Mg -2.931768 -0.968513 0.562518  
 S -1.229495 -2.735346 -0.458828  
 O 0.144996 -3.183522 -0.333574  
 O -1.479281 -1.326135 -0.912773  
 O -2.154373 -2.952291 0.706805  
 C -1.975628 -3.755089 -1.802843  
 F -1.327715 -3.535474 -2.945342  
 F -3.260524 -3.422560 -1.955688  
 F -1.891744 -5.045725 -1.486106  
 S -5.500167 -0.651178 -0.088067  
 O -4.950406 -1.356406 1.119102  
 O -6.588507 -1.285994 -0.807917  
 O -4.299705 -0.209124 -0.874555  
 C -6.180846 0.927283 0.581701  
 F -7.247273 0.674814 1.336835  
 F -6.526904 1.724917 -0.426718  
 F -5.251872 1.537393 1.322384

B2-C2

Mn 1.765256 0.798222 -0.251779  
 O 2.292000 -0.489526 -2.849922  
 O 0.830741 2.722608 -2.267258  
 N 0.302930 0.898839 1.050425  
 N 2.238935 -0.804462 1.005852  
 C 2.124977 -0.044420 -1.771226  
 C 1.129351 1.996636 -1.389950  
 C -0.668049 1.901506 1.186353  
 C -1.867361 1.667377 1.813302  
 H -2.608483 2.464679 1.854257  
 C -2.112050 0.426601 2.493310  
 H -2.990777 0.310632 3.127651  
 C -0.999006 -0.409472 2.657898  
 H -1.069810 -1.277893 3.308587  
 C 0.177026 -0.170315 1.954604  
 C 1.297539 -1.055663 1.978189  
 C 1.445182 -2.102638 2.907104  
 H 0.687463 -2.253149 3.671513  
 C 2.552285 -2.915765 2.853265  
 H 2.687810 -3.724169 3.568482  
 C 3.512075 -2.664460 1.861728  
 H 4.408947 -3.275496 1.782394  
 C 3.339276 -1.618417 0.970712  
 C -0.337832 3.278623 0.748298  
 C -1.095130 3.932926 -0.240453  
 C -0.788734 5.256080 -0.571348  
 H -1.369723 5.749150 -1.353191  
 C 0.247188 5.953278 0.047771  
 C 0.980145 5.290066 1.038810  
 H 1.779237 5.823146 1.558226  
 C 0.704666 3.974906 1.408522  
 C -2.183680 3.220417 -0.984787  
 H -3.130778 3.201012 -0.428745  
 H -1.920609 2.175068 -1.186358  
 H -2.385899 3.710526 -1.944725  
 C 0.566943 7.369226 -0.323012  
 H 0.491226 8.040938 0.542570  
 H -0.109788 7.746607 -1.097807  
 H 1.593441 7.466799 -0.700890  
 C 1.488005 3.347585 2.522416  
 H 2.054421 4.104021 3.077169  
 H 2.201387 2.597247 2.151443  
 H 0.835358 2.821723 3.232768  
 C 4.399446 -1.379694 -0.043672  
 C 4.403357 -2.122654 -1.235532  
 C 5.428627 -1.907415 -2.160654  
 H 5.421005 -2.470411 -3.095967  
 C 6.453427 -0.989741 -1.925009  
 C 6.451273 -0.296830 -0.709490  
 H 7.256303 0.408721 -0.493883  
 C 5.449400 -0.486882 0.242104  
 C 3.332241 -3.135559 -1.513850  
 H 3.442574 -4.026300 -0.878734  
 H 3.364930 -3.467982 -2.557424  
 H 2.328651 -2.736537 -1.322772  
 C 7.531003 -0.752457 -2.939367  
 H 7.452270 -1.447613 -3.782757  
 H 8.531721 -0.864569 -2.502383  
 H 7.482649 0.266612 -3.346248  
 C 5.517035 0.214627 1.566191  
 H 4.538319 0.595454 1.885269  
 H 6.212876 1.060127 1.534648  
 H 5.862583 -0.467220 2.356693  
 C 3.255968 1.754949 -0.177337  
 O 4.156785 2.514348 -0.212947  
 Mg -2.920527 -0.700094 0.660121  
 S -1.969004 -2.896396 -0.524131

O -2.016244 -3.575649 -1.806331  
O -3.257425 -2.753667 0.238661  
O -1.309193 -1.552362 -0.464968  
C -0.922294 -3.956623 0.571240  
F -1.315108 -5.225699 0.476023  
F -1.048076 -3.557589 1.838015  
F 0.356776 -3.859720 0.207068  
S -5.058378 0.517793 -0.385956  
O -3.755606 0.199893 -1.062348  
O -5.574263 1.869815 -0.513539  
O -4.946540 -0.057590 0.995119  
C -6.288617 -0.558780 -1.241088  
F -6.363918 -0.208578 -2.524416  
F -7.482191 -0.402330 -0.668904  
F -5.924311 -1.836486 -1.154596

#### B2-C3

Mn 2.797607 -0.624566 -0.332809  
O 4.803655 -1.458384 -2.322521  
O 1.298451 -1.859952 -2.544819  
N 1.434236 -0.969085 1.152092  
N 3.991052 -0.682586 1.348075  
C 4.072238 -1.105470 -1.463173  
C 1.833067 -1.365242 -1.611285  
C 0.060063 -0.946202 1.054464  
C -0.773211 -1.359723 2.073582  
H -1.850347 -1.334762 1.915694  
C -0.233144 -1.766207 3.307621  
H -0.877452 -2.090124 4.121262  
C 1.131331 -1.682152 3.468034  
H 1.583084 -1.930981 4.424953  
C 1.952198 -1.267762 2.404873  
C 3.367318 -1.112012 2.511314  
C 4.084630 -1.365485 3.694354  
H 3.556710 -1.729912 4.571900  
C 5.441435 -1.146339 3.744800  
H 6.010088 -1.341638 4.651066  
C 6.059731 -0.611595 2.600980  
H 7.117422 -0.354368 2.607749  
C 5.329809 -0.371103 1.452184  
C -0.553426 -0.368276 -0.169608  
C -1.211096 -1.193161 -1.104565  
C -1.822914 -0.599277 -2.226205  
H -2.306707 -1.240188 -2.964399  
C -1.767664 0.787213 -2.454631  
C -1.141906 1.585336 -1.482668  
H -1.138700 2.668459 -1.610065  
C -0.545448 1.036217 -0.344055  
C -1.252643 -2.680642 -0.932150  
H -2.029394 -2.985306 -0.219171  
H -0.297851 -3.058875 -0.550659  
H -1.463772 -3.178390 -1.884170  
C -2.376816 1.392526 -3.679925  
H -2.598875 2.454578 -3.535226  
H -3.301204 0.878487 -3.968281  
H -1.686889 1.312100 -4.530366  
C 0.009852 1.938484 0.711859  
H 0.069001 2.972440 0.357686  
H 1.011539 1.622159 1.026168  
H -0.631029 1.921468 1.603725  
C 6.020108 0.309440 0.324311  
C 6.960850 -0.384066 -0.458140  
C 7.640612 0.298731 -1.468417  
H 8.352619 -0.250589 -2.087913  
C 7.418648 1.654240 -1.720641  
C 6.499628 2.329853 -0.912999  
H 6.325952 3.395084 -1.078255

C 5.810252 1.687401 0.117458  
C 7.220231 -1.844806 -0.236363  
H 7.891180 -2.017138 0.616997  
H 7.690696 -2.298913 -1.115996  
H 6.295343 -2.396332 -0.026732  
C 8.164793 2.366845 -2.807787  
H 8.171941 1.790224 -3.741204  
H 9.216610 2.529450 -2.534218  
H 7.728512 3.349313 -3.020690  
C 4.910679 2.476360 1.021601  
H 3.935079 1.992953 1.158983  
H 4.736032 3.483597 0.626763  
H 5.354093 2.585705 2.021923  
C 2.644959 1.024440 -0.942291  
O 2.547587 2.065859 -1.495992  
Mg -3.470175 0.314833 -0.607959  
S -3.874573 2.724953 0.438765  
O -3.150122 3.967266 0.638146  
O -3.342156 1.490407 1.116938  
O -4.185472 2.311298 -0.968514  
C -5.526100 2.965415 1.224737  
F -5.361162 3.300035 2.503214  
F -6.231489 1.836399 1.152957  
F -6.183540 3.935805 0.592878  
S -5.271481 -1.548302 0.053831  
O -5.442031 -0.421582 -0.924680  
O -6.324602 -1.764198 1.028597  
O -3.861984 -1.429130 0.557804  
C -5.227458 -3.066373 -0.995543  
F -6.438469 -3.303726 -1.493846  
F -4.837874 -4.102949 -0.255250  
F -4.364374 -2.897719 -1.999345

#### B2-C4

Mn -2.837878 -0.704822 0.574639  
O -4.914773 -0.590182 2.661703  
O -1.489666 -1.576679 3.044816  
N -1.537990 -1.601466 -0.730297  
N -4.049685 -1.118191 -1.032267  
C -4.148767 -0.624855 1.762148  
C -1.972634 -1.243529 2.016562  
C -0.168511 -1.687291 -0.624024  
C 0.602011 -2.462845 -1.466567  
H 1.677915 -2.500395 -1.305586  
C 0.001702 -3.159791 -2.530944  
H 0.596474 -3.771025 -3.205421  
C -1.351890 -2.997533 -2.723257  
H -1.843793 -3.474077 -3.567497  
C -2.108057 -2.208058 -1.839794  
C -3.503065 -1.949428 -2.000537  
C -4.274078 -2.483157 -3.048002  
H -3.810753 -3.160697 -3.760860  
C -5.602244 -2.146629 -3.174202  
H -6.213532 -2.556611 -3.974797  
C -6.126519 -1.205850 -2.269851  
H -7.146403 -0.840028 -2.375256  
C -5.344270 -0.694994 -1.251652  
C 0.517011 -0.849879 0.395406  
C 1.116139 -1.441578 1.527255  
C 1.784140 -0.630521 2.451848  
H 2.241072 -1.094978 3.326755  
C 1.861028 0.760835 2.302902  
C 1.314702 1.323128 1.130239  
H 1.385214 2.400409 0.972665  
C 0.653855 0.537007 0.169089  
C 1.067047 -2.921691 1.737829  
H 1.795790 -3.435786 1.096881

|       |           |           |           |    |           |           |           |
|-------|-----------|-----------|-----------|----|-----------|-----------|-----------|
| H     | 0.080274  | -3.331055 | 1.493992  | C  | 1.752934  | -1.618907 | 3.429451  |
| H     | 1.302441  | -3.179378 | 2.775808  | H  | 1.045322  | -1.701010 | 4.250249  |
| C     | 2.515350  | 1.615743  | 3.343233  | C  | 2.870226  | -2.417294 | 3.403427  |
| H     | 2.660589  | 2.641191  | 2.990198  | H  | 3.062065  | -3.144265 | 4.189608  |
| H     | 3.488653  | 1.211484  | 3.647666  | C  | 3.773839  | -2.242891 | 2.340200  |
| H     | 1.894126  | 1.658218  | 4.247197  | H  | 4.688777  | -2.829863 | 2.281906  |
| C     | 0.175028  | 1.169895  | -1.102842 | C  | 3.531776  | -1.298088 | 1.360275  |
| H     | 0.085557  | 2.254754  | -0.995236 | C  | -0.659422 | 3.185291  | 0.451373  |
| H     | -0.799254 | 0.772660  | -1.407412 | C  | -1.609720 | 3.301605  | -0.578866 |
| H     | 0.879794  | 0.971224  | -1.923039 | C  | -1.627778 | 4.458551  | -1.362620 |
| C     | -5.903281 | 0.408419  | -0.426891 | H  | -2.360292 | 4.536860  | -2.168343 |
| C     | -6.923503 | 0.162783  | 0.505974  | C  | -0.724734 | 5.501587  | -1.160715 |
| C     | -7.465554 | 1.236562  | 1.220054  | C  | 0.201914  | 5.373176  | -0.119927 |
| H     | -8.243066 | 1.037567  | 1.960274  | H  | 0.901184  | 6.188520  | 0.077066  |
| C     | -7.029262 | 2.546151  | 1.027101  | C  | 0.237395  | 4.246742  | 0.701640  |
| C     | -6.034638 | 2.772529  | 0.067615  | C  | -2.549169 | 2.176492  | -0.900266 |
| H     | -5.697117 | 3.793624  | -0.122318 | H  | -3.100065 | 1.826729  | -0.017604 |
| C     | -5.476532 | 1.732519  | -0.673399 | H  | -1.997124 | 1.311694  | -1.298309 |
| C     | -7.420150 | -1.228988 | 0.763333  | H  | -3.285782 | 2.469601  | -1.657205 |
| H     | -8.150374 | -1.550387 | 0.007175  | C  | -0.749629 | 6.730941  | -2.017064 |
| H     | -7.915208 | -1.295377 | 1.738987  | H  | -0.935129 | 7.635435  | -1.422280 |
| H     | -6.605826 | -1.963528 | 0.747912  | H  | -1.528876 | 6.672254  | -2.785191 |
| C     | -7.610333 | 3.684594  | 1.809420  | H  | 0.210161  | 6.887749  | -2.526892 |
| H     | -8.398001 | 3.345677  | 2.491665  | C  | 1.174375  | 4.206112  | 1.871706  |
| H     | -8.044375 | 4.448493  | 1.150576  | H  | 1.846960  | 5.071285  | 1.870501  |
| H     | -6.845520 | 4.193675  | 2.411019  | H  | 1.789060  | 3.296662  | 1.875662  |
| C     | -4.480771 | 2.033332  | -1.753599 | H  | 0.621494  | 4.215907  | 2.822033  |
| H     | -3.563601 | 1.439962  | -1.643683 | C  | 4.573808  | -1.119275 | 0.313474  |
| H     | -4.200812 | 3.092843  | -1.750300 | C  | 4.659670  | -2.025212 | -0.755284 |
| H     | -4.889894 | 1.799907  | -2.747081 | C  | 5.687360  | -1.873940 | -1.691378 |
| C     | -2.427120 | 1.005665  | 0.706838  | H  | 5.739841  | -2.567448 | -2.533146 |
| O     | -2.178651 | 2.137838  | 0.946972  | C  | 6.632216  | -0.853483 | -1.590050 |
| Mg    | 3.395708  | 0.389656  | 0.322678  | C  | 6.543917  | 0.019936  | -0.499260 |
| S     | 4.778841  | 2.412684  | -0.727336 | H  | 7.285935  | 0.813370  | -0.387081 |
| O     | 6.170517  | 2.763270  | -0.946568 | C  | 5.541992  | -0.105725 | 0.462208  |
| O     | 4.280963  | 2.335978  | 0.682543  | C  | 3.658904  | -3.132345 | -0.909568 |
| O     | 4.264552  | 1.171521  | -1.408145 | H  | 3.645439  | -3.511709 | -1.937941 |
| C     | 3.787291  | 3.771663  | -1.483187 | H  | 2.643442  | -2.801354 | -0.661585 |
| F     | 4.090717  | 3.882887  | -2.774846 | H  | 3.885819  | -3.982510 | -0.250119 |
| F     | 4.058282  | 4.918229  | -0.862465 | C  | 7.718940  | -0.695589 | -2.610220 |
| F     | 2.486583  | 3.501526  | -1.358056 | H  | 7.659057  | -1.466677 | -3.386534 |
| S     | 4.773931  | -1.819968 | 0.865600  | H  | 8.715732  | -0.758450 | -2.153556 |
| O     | 3.725045  | -1.634964 | -0.197230 | H  | 7.667672  | 0.282005  | -3.107781 |
| O     | 4.654472  | -2.978974 | 1.731601  | C  | 5.532437  | 0.789380  | 1.665761  |
| O     | 4.932810  | -0.473204 | 1.509619  | H  | 4.525399  | 1.158442  | 1.898359  |
| C     | 6.337119  | -2.052905 | -0.086398 | H  | 6.184861  | 1.657804  | 1.521480  |
| F     | 6.242496  | -3.157207 | -0.824468 | H  | 5.888727  | 0.254006  | 2.557902  |
| F     | 7.358136  | -2.170311 | 0.760351  | C  | 3.085012  | 2.085954  | -0.116767 |
| F     | 6.543546  | -1.005589 | -0.883332 | O  | 3.881146  | 2.945170  | -0.295340 |
| B2-Z1 |           |           |           | Mg | -2.941063 | -0.992980 | 0.710893  |
| Mn    | 1.813412  | 0.863723  | -0.082095 | S  | -0.986012 | -2.668441 | 0.076908  |
| O     | 2.577924  | -0.646786 | -2.493442 | O  | 0.208103  | -3.192172 | 0.714207  |
| O     | 0.496263  | 2.097057  | -2.403037 | O  | -1.074877 | -1.187388 | -0.161760 |
| N     | 0.361628  | 1.094615  | 1.330375  | O  | -2.314689 | -3.047612 | 0.670220  |
| N     | 2.398937  | -0.518874 | 1.344638  | C  | -0.956678 | -3.361636 | -1.631273 |
| C     | 2.324548  | -0.106876 | -1.470410 | F  | 0.143628  | -2.916372 | -2.241038 |
| C     | 0.947084  | 1.654802  | -1.402944 | F  | -2.029031 | -2.972428 | -2.316655 |
| C     | -0.674526 | 2.009235  | 1.360935  | F  | -0.926931 | -4.692006 | -1.576782 |
| C     | -1.727971 | 1.917326  | 2.251300  | S  | -5.393022 | -1.400690 | -0.222537 |
| H     | -2.514208 | 2.668912  | 2.202368  | O  | -4.954612 | -1.430078 | 1.216337  |
| C     | -1.771752 | 0.891080  | 3.219545  | O  | -6.199198 | -2.505832 | -0.705129 |
| H     | -2.596972 | 0.812467  | 3.923917  | O  | -4.166334 | -1.028599 | -1.006745 |
| C     | -0.688143 | 0.040371  | 3.281477  | C  | -6.464078 | 0.097787  | -0.330010 |
| H     | -0.651255 | -0.735575 | 4.042209  | F  | -7.552903 | -0.080274 | 0.414777  |
| C     | 0.374520  | 0.163991  | 2.368552  | F  | -6.818484 | 0.300986  | -1.596428 |
| C     | 1.520054  | -0.684047 | 2.402224  | F  | -5.794605 | 1.162023  | 0.116450  |



## B2-Z2

Mn -2.743913 -0.652830 -0.506068  
 O -4.772784 -2.771784 -0.788984  
 O -1.192564 -3.148745 -0.681622  
 N -1.406043 0.545776 -1.449790  
 N -3.925837 0.934680 -1.108879  
 C -4.021068 -1.865208 -0.683713  
 C -1.750922 -2.107565 -0.619406  
 C -0.031693 0.410535 -1.482073  
 C 0.763679 1.084661 -2.385660  
 H 1.836405 0.895494 -2.385338  
 C 0.201791 2.049033 -3.241655  
 H 0.818389 2.596937 -3.949612  
 C -1.140833 2.328094 -3.095961  
 H -1.600352 3.116813 -3.686819  
 C -1.929214 1.594327 -2.195746  
 C -3.323049 1.824792 -1.982696  
 C -4.039096 2.868170 -2.596090  
 H -3.528384 3.532086 -3.289079  
 C -5.371052 3.056607 -2.308076  
 H -5.937609 3.860856 -2.771925  
 C -5.966281 2.203822 -1.363284  
 H -7.003215 2.341338 -1.062290  
 C -5.237067 1.184404 -0.778608  
 C 0.613025 -0.404994 -0.425080  
 C 1.322708 -1.586768 -0.741816  
 C 1.945470 -2.306325 0.291475  
 H 2.480594 -3.223259 0.045863  
 C 1.873578 -1.904904 1.633013  
 C 1.201126 -0.702238 1.918114  
 H 1.191984 -0.328223 2.941598  
 C 0.583324 0.060409 0.918245  
 C 1.402465 -2.088844 -2.150042  
 H 2.202507 -1.591543 -2.713410  
 H 0.466681 -1.905201 -2.688813  
 H 1.606905 -3.163979 -2.167525  
 C 2.534932 -2.691252 2.718853  
 H 3.079664 -2.036532 3.409900  
 H 3.237566 -3.425298 2.311369  
 H 1.788933 -3.233791 3.314129  
 C -0.036636 1.375631 1.267187  
 H -1.130938 1.324686 1.184952  
 H 0.288772 2.165185 0.577749  
 H 0.218621 1.673870 2.289373  
 C -5.894319 0.371120 0.278801  
 C -6.851544 -0.597832 -0.062451  
 C -7.486659 -1.313063 0.958307  
 H -8.214768 -2.080760 0.688934  
 C -7.207661 -1.081380 2.304638  
 C -6.278981 -0.082900 2.621353  
 H -6.063301 0.134421 3.669660  
 C -5.628146 0.655487 1.634621  
 C -7.198477 -0.875325 -1.495329  
 H -7.921661 -0.145256 -1.886124  
 H -7.649075 -1.868150 -1.606106  
 H -6.319302 -0.830662 -2.148941  
 C -7.884093 -1.867818 3.386282  
 H -8.628389 -2.560225 2.977196  
 H -8.394269 -1.212890 4.104880  
 H -7.163227 -2.460369 3.965504  
 C -4.714283 1.781107 2.018427  
 H -3.791057 1.784497 1.425707  
 H -4.436860 1.724832 3.076857  
 H -5.199639 2.754485 1.855719  
 C -2.697911 -0.634428 1.260013  
 O -2.623256 -0.778810 2.431711  
 Mg 3.178255 -0.019553 0.455812

S 5.457966 -1.118654 -0.407470  
 O 6.833521 -0.698315 -0.606191  
 O 4.399857 -0.438580 -1.231893  
 O 4.927220 -1.107407 0.996968  
 C 5.405247 -2.921826 -0.928902  
 F 6.525451 -3.229953 -1.575058  
 F 4.367184 -3.140651 -1.734266  
 F 5.293803 -3.697303 0.148202  
 S 3.397098 2.523012 1.275643  
 O 3.544334 1.300639 2.129395  
 O 2.673765 3.658860 1.816889  
 O 2.998996 2.022053 -0.084916  
 C 5.134777 3.085587 1.028569  
 F 5.665690 3.435270 2.198249  
 F 5.166783 4.125342 0.197955  
 F 5.847127 2.082084 0.504891

## D0-O1

Mn 1.359005 0.494739 -0.064879  
 O 0.555777 -2.311506 0.499377  
 O -1.532471 0.542218 0.431396  
 N 1.855468 2.524738 -0.446636  
 N 3.456929 0.368217 -0.444293  
 C 0.993507 -1.266896 0.271315  
 C -0.383667 0.660120 0.225494  
 C 1.001212 3.577208 -0.446417  
 C 1.459444 4.879295 -0.654266  
 H 0.737652 5.692146 -0.646373  
 C 2.806759 5.113889 -0.872759  
 H 3.178999 6.121822 -1.037631  
 C 3.674417 4.034655 -0.882795  
 H 4.732062 4.197196 -1.056527  
 C 3.178233 2.748949 -0.667656  
 C 4.051576 1.570780 -0.673398  
 C 5.421597 1.674624 -0.911031  
 H 5.879039 2.640181 -1.094449  
 C 6.203980 0.531921 -0.916898  
 H 7.273446 0.596842 -1.100657  
 C 5.592740 -0.689493 -0.692213  
 H 6.161647 -1.615501 -0.696575  
 C 4.216702 -0.752664 -0.459429  
 C -0.454363 3.372956 -0.248553  
 C -1.014094 3.544944 1.035420  
 C -2.388517 3.381635 1.188483  
 H -2.822956 3.481576 2.184913  
 C -3.221158 3.083711 0.103296  
 C -2.646494 2.974269 -1.164383  
 H -3.284078 2.757845 -2.022151  
 C -1.273684 3.127734 -1.367488  
 C -0.158724 3.915529 2.209109  
 H 0.059448 4.993042 2.212619  
 H 0.813226 3.408708 2.199480  
 H -0.657335 3.682601 3.155785  
 C -4.690064 2.878093 0.306149  
 H -5.226984 2.818804 -0.646407  
 H -5.131551 3.687677 0.900630  
 H -4.891271 1.947223 0.854813  
 C -0.713097 3.079619 -2.757301  
 H -1.268437 2.375879 -3.385712  
 H 0.345836 2.800684 -2.783943  
 H -0.784895 4.067693 -3.234219  
 C 3.619580 -2.096951 -0.263678  
 C 3.563415 -2.669513 1.020279  
 C 3.103234 -3.980848 1.146648  
 H 3.049680 -4.424036 2.142476  
 C 2.690180 -4.728241 0.043626  
 C 2.772697 -4.141099 -1.222775

|       |           |           |           |       |           |           |           |
|-------|-----------|-----------|-----------|-------|-----------|-----------|-----------|
| H     | 2.470978  | -4.716642 | -2.099370 | C     | 0.101692  | -3.204450 | 0.667348  |
| C     | 3.251269  | -2.844718 | -1.402730 | C     | 2.596663  | -4.225067 | -2.046935 |
| C     | 3.918105  | -1.898363 | 2.255881  | H     | 3.164361  | -5.071481 | -1.636358 |
| H     | 4.603867  | -2.466724 | 2.896013  | H     | 3.258078  | -3.349632 | -1.990227 |
| H     | 3.019987  | -1.706136 | 2.860529  | H     | 2.410020  | -4.439042 | -3.104721 |
| H     | 4.386579  | -0.931365 | 2.041835  | C     | -2.409048 | -4.636498 | -1.819587 |
| C     | 2.146737  | -6.112672 | 0.212269  | H     | -3.267436 | -4.362244 | -1.195865 |
| H     | 2.397546  | -6.754930 | -0.639781 | H     | -2.447035 | -5.721428 | -1.983120 |
| H     | 1.050304  | -6.096929 | 0.285403  | H     | -2.542929 | -4.168063 | -2.803058 |
| H     | 2.521692  | -6.587374 | 1.125807  | C     | 0.096353  | -2.657431 | 2.065966  |
| C     | 3.412431  | -2.296513 | -2.789643 | H     | -0.926080 | -2.516183 | 2.430425  |
| H     | 3.355386  | -1.203455 | -2.829546 | H     | 0.621774  | -1.697832 | 2.161751  |
| H     | 2.653031  | -2.701813 | -3.467716 | H     | 0.603247  | -3.347184 | 2.755428  |
| H     | 4.392275  | -2.571806 | -3.205340 | C     | 1.774888  | 3.062841  | 0.879586  |
| C     | 1.053317  | 0.209562  | -1.899960 | C     | 2.010679  | 4.064719  | -0.078595 |
| O     | 0.857601  | 0.008134  | -3.013701 | C     | 0.923119  | 4.784014  | -0.574724 |
| C     | 1.794278  | 0.820101  | 1.735019  | H     | 1.098344  | 5.537000  | -1.344509 |
| O     | 2.076266  | 1.033833  | 2.828394  | C     | -0.381391 | 4.543944  | -0.136995 |
| Mg    | -3.144914 | -0.873136 | 0.444781  | C     | -0.580010 | 3.581966  | 0.857625  |
| S     | -3.022551 | -0.739388 | -2.213751 | H     | -1.587149 | 3.405991  | 1.238941  |
| O     | -2.432189 | 0.110306  | -3.230295 | C     | 0.478203  | 2.845999  | 1.391594  |
| O     | -4.009993 | -0.100874 | -1.268975 | C     | 3.391564  | 4.317830  | -0.605341 |
| O     | -2.102140 | -1.547351 | -1.348242 | H     | 4.008897  | 4.868780  | 0.117408  |
| C     | -4.036899 | -1.994475 | -3.109355 | H     | 3.359436  | 4.909774  | -1.526251 |
| F     | -5.018434 | -1.383347 | -3.767593 | H     | 3.926283  | 3.383069  | -0.823795 |
| F     | -4.559215 | -2.852790 | -2.232475 | C     | -1.542300 | 5.266594  | -0.745148 |
| F     | -3.266398 | -2.655521 | -3.969013 | H     | -1.259090 | 6.260853  | -1.108590 |
| S     | -2.724103 | -1.314622 | 3.036840  | H     | -2.369225 | 5.379504  | -0.034869 |
| O     | -2.100709 | -2.004572 | 1.854616  | H     | -1.937036 | 4.711105  | -1.608173 |
| O     | -3.227401 | -2.148950 | 4.110978  | C     | 0.234551  | 1.925379  | 2.551520  |
| O     | -3.655289 | -0.292210 | 2.445678  | H     | 0.558218  | 2.399786  | 3.489073  |
| C     | -1.312664 | -0.346162 | 3.779977  | H     | 0.784431  | 0.977917  | 2.487787  |
| F     | -1.570340 | -0.096350 | 5.058060  | H     | -0.830064 | 1.693172  | 2.654038  |
| F     | -1.134538 | 0.810089  | 3.139012  | C     | 0.391250  | -0.049678 | 0.083112  |
| F     | -0.197648 | -1.071935 | 3.681177  | O     | -0.747136 | -0.077129 | 0.322286  |
|       |           |           |           | Mg    | -2.945514 | -0.549242 | -0.237165 |
| D0-O2 |           |           |           | S     | -2.833655 | 0.179264  | -2.794310 |
| Mn    | 2.122521  | -0.053713 | -0.523220 | O     | -3.418414 | -0.145279 | -4.079720 |
| O     | 1.705845  | 2.221663  | -2.387895 | O     | -2.023087 | -0.883266 | -2.098903 |
| O     | 1.154283  | -1.478786 | -2.947851 | O     | -3.723109 | 0.746739  | -1.724733 |
| N     | 2.832772  | -1.632092 | 0.720803  | C     | -1.607621 | 1.523140  | -3.090416 |
| N     | 3.014170  | 0.965626  | 1.120257  | F     | -0.614203 | 1.061986  | -3.846218 |
| C     | 1.832680  | 1.403526  | -1.581729 | F     | -1.120032 | 1.923089  | -1.910869 |
| C     | 1.525873  | -1.013977 | -1.956897 | F     | -2.191373 | 2.552561  | -3.693655 |
| C     | 2.564149  | -2.951251 | 0.597624  | S     | -3.396037 | -0.193276 | 2.355646  |
| C     | 3.403369  | -3.910348 | 1.168732  | O     | -3.221276 | -1.488376 | 1.600525  |
| H     | 3.157255  | -4.961716 | 1.043167  | O     | -2.619954 | -0.026201 | 3.569591  |
| C     | 4.511281  | -3.511153 | 1.900686  | O     | -3.322976 | 0.877915  | 1.307761  |
| H     | 5.181862  | -4.245603 | 2.339674  | C     | -5.169488 | -0.217148 | 2.866941  |
| C     | 4.726951  | -2.155748 | 2.103185  | F     | -5.939258 | -0.373320 | 1.790302  |
| H     | 5.558128  | -1.820148 | 2.714654  | F     | -5.470735 | 0.932103  | 3.464353  |
| C     | 3.864400  | -1.234398 | 1.513535  | F     | -5.373150 | -1.226958 | 3.707959  |
| C     | 3.947375  | 0.208623  | 1.758344  | C     | 3.872066  | -0.125273 | -1.282088 |
| C     | 4.861046  | 0.770769  | 2.647075  | O     | 4.905522  | -0.173409 | -1.777367 |
| H     | 5.608430  | 0.152695  | 3.133631  |       |           |           |           |
| C     | 4.797322  | 2.130280  | 2.914045  | D0-C1 |           |           |           |
| H     | 5.504862  | 2.589647  | 3.599703  | Mn    | 2.096492  | 0.913049  | -0.035817 |
| C     | 3.793266  | 2.881013  | 2.322736  | O     | 4.692299  | 0.966435  | -1.459817 |
| H     | 3.670693  | 3.937366  | 2.547901  | O     | 2.066052  | 3.206232  | -1.910030 |
| C     | 2.902020  | 2.277804  | 1.432291  | N     | 0.208430  | 1.005541  | 0.948448  |
| C     | 1.302522  | -3.370789 | -0.052124 | N     | 2.200621  | -0.770119 | 1.262971  |
| C     | 1.312112  | -4.012382 | -1.303635 | C     | 3.726949  | 0.820346  | -0.835240 |
| C     | 0.097294  | -4.412205 | -1.858809 | C     | 1.941483  | 2.352949  | -1.135663 |
| H     | 0.097502  | -4.873929 | -2.847304 | C     | -0.749958 | 1.950998  | 0.792062  |
| C     | -1.115576 | -4.220567 | -1.191173 | C     | -1.950821 | 1.891651  | 1.504675  |
| C     | -1.089495 | -3.631090 | 0.075985  | H     | -2.693715 | 2.668674  | 1.340695  |
| H     | -2.021538 | -3.519030 | 0.632126  | C     | -2.159546 | 0.881651  | 2.430001  |

|    |           |           |           |       |           |           |           |
|----|-----------|-----------|-----------|-------|-----------|-----------|-----------|
| H  | -3.074392 | 0.839633  | 3.016773  | O     | -7.183697 | -1.368605 | -0.587723 |
| C  | -1.170537 | -0.074882 | 2.600146  | O     | -4.829908 | -0.480353 | -0.905818 |
| H  | -1.308134 | -0.866140 | 3.328302  | C     | -6.394877 | 0.692346  | 0.885115  |
| C  | 0.000148  | 0.002196  | 1.843262  | F     | -7.219211 | 0.417144  | 1.890346  |
| C  | 1.075618  | -0.983000 | 1.994393  | F     | -6.984731 | 1.524735  | 0.034151  |
| C  | 0.946567  | -2.085142 | 2.839696  | F     | -5.284352 | 1.259139  | 1.361941  |
| H  | 0.037553  | -2.245132 | 3.408887  |       |           |           |           |
| C  | 1.983896  | -2.996844 | 2.936819  | D0-C3 |           |           |           |
| H  | 1.895234  | -3.867322 | 3.581982  | Mn    | -2.797535 | 0.024477  | -0.223120 |
| C  | 3.134783  | -2.769113 | 2.201126  | O     | -4.461798 | 1.778375  | -1.935547 |
| H  | 3.983717  | -3.446177 | 2.253981  | O     | -1.006244 | 1.410033  | -2.127503 |
| C  | 3.229118  | -1.643637 | 1.379721  | N     | -1.498511 | -1.202783 | 0.946307  |
| C  | -0.536943 | 3.129630  | -0.084459 | N     | -4.167899 | -0.917535 | 1.108044  |
| C  | -1.032680 | 3.130049  | -1.403953 | C     | -3.942476 | 1.052316  | -1.197245 |
| C  | -0.895345 | 4.286129  | -2.167767 | C     | -1.599158 | 0.808232  | -1.332539 |
| H  | -1.266202 | 4.285304  | -3.193809 | C     | -0.154980 | -1.319123 | 0.832113  |
| C  | -0.288462 | 5.439295  | -1.659246 | C     | 0.584392  | -2.153570 | 1.670406  |
| C  | 0.158081  | 5.423611  | -0.337494 | H     | 1.661243  | -2.210790 | 1.529997  |
| H  | 0.609618  | 6.322427  | 0.085494  | C     | -0.060824 | -2.891130 | 2.649450  |
| C  | 0.028008  | 4.293089  | 0.471772  | H     | 0.496008  | -3.547571 | 3.313243  |
| C  | -1.677754 | 1.908183  | -1.980941 | C     | -1.435615 | -2.777677 | 2.764105  |
| H  | -2.565257 | 1.602893  | -1.408588 | H     | -1.960506 | -3.349948 | 3.520422  |
| H  | -0.998494 | 1.046351  | -1.973959 | C     | -2.134049 | -1.929032 | 1.904294  |
| H  | -1.991649 | 2.077307  | -3.016191 | C     | -3.589941 | -1.776485 | 1.989942  |
| C  | -0.106193 | 6.650672  | -2.519169 | C     | -4.343163 | -2.476665 | 2.931773  |
| H  | -0.026777 | 7.565343  | -1.921156 | H     | -3.864525 | -3.155119 | 3.628537  |
| H  | -0.931878 | 6.772361  | -3.229788 | C     | -5.716257 | -2.301624 | 2.977571  |
| H  | 0.814743  | 6.574517  | -3.114062 | H     | -6.317176 | -2.840393 | 3.705835  |
| C  | 0.427224  | 4.366476  | 1.916086  | C     | -6.300522 | -1.424662 | 2.079806  |
| H  | 1.293015  | 5.022804  | 2.058270  | H     | -7.373146 | -1.248425 | 2.077455  |
| H  | 0.664981  | 3.389740  | 2.350481  | C     | -5.509906 | -0.739716 | 1.154410  |
| H  | -0.391180 | 4.783673  | 2.520161  | C     | 0.590029  | -0.567549 | -0.209888 |
| C  | 4.512304  | -1.409375 | 0.673130  | C     | 1.112761  | 0.700658  | 0.080506  |
| C  | 4.769297  | -2.051136 | -0.552990 | C     | 1.875737  | 1.354791  | -0.908530 |
| C  | 6.014636  | -1.867290 | -1.153024 | H     | 2.201555  | 2.382391  | -0.727238 |
| H  | 6.212483  | -2.348231 | -2.112362 | C     | 2.108485  | 0.773111  | -2.168877 |
| C  | 7.005681  | -1.076180 | -0.567644 | C     | 1.629359  | -0.524256 | -2.393563 |
| C  | 6.735783  | -0.480480 | 0.667095  | H     | 1.837900  | -1.010935 | -3.346659 |
| H  | 7.506390  | 0.123533  | 1.148953  | C     | 0.878106  | -1.205149 | -1.437241 |
| C  | 5.509737  | -0.643840 | 1.310928  | C     | 0.902065  | 1.366289  | 1.405555  |
| C  | 3.741417  | -2.924682 | -1.207752 | H     | 1.805981  | 1.287658  | 2.026289  |
| H  | 3.879232  | -3.977877 | -0.923655 | H     | 0.087070  | 0.914565  | 1.978738  |
| H  | 3.816735  | -2.876875 | -2.300273 | H     | 0.693183  | 2.435364  | 1.283525  |
| H  | 2.717308  | -2.658445 | -0.925365 | C     | 2.835033  | 1.518293  | -3.243336 |
| C  | 8.313626  | -0.847330 | -1.258733 | H     | 3.630667  | 0.911475  | -3.692148 |
| H  | 8.588230  | -1.692615 | -1.899824 | H     | 3.270234  | 2.451176  | -2.872231 |
| H  | 9.126719  | -0.676704 | -0.543934 | H     | 2.140616  | 1.774570  | -4.053913 |
| H  | 8.265398  | 0.040821  | -1.904462 | C     | 0.436793  | -2.611063 | -1.690117 |
| C  | 5.302114  | -0.064419 | 2.678899  | H     | 0.408760  | -2.833838 | -2.761481 |
| H  | 4.252328  | 0.157360  | 2.898841  | H     | -0.546945 | -2.828858 | -1.260457 |
| H  | 5.880241  | 0.856279  | 2.814792  | H     | 1.141980  | -3.316388 | -1.228325 |
| H  | 5.637508  | -0.770439 | 3.452183  | C     | -6.191058 | 0.200242  | 0.230932  |
| C  | 2.848905  | 1.994715  | 1.291452  | C     | -6.414766 | 1.529083  | 0.642576  |
| O  | 3.360710  | 2.679452  | 2.062925  | C     | -7.120546 | 2.379278  | -0.208091 |
| C  | 1.408240  | -0.189431 | -1.395446 | H     | -7.281809 | 3.414250  | 0.097782  |
| O  | 1.070981  | -0.815946 | -2.300233 | C     | -7.625345 | 1.942226  | -1.434994 |
| Mg | -3.412061 | -1.497623 | 0.238588  | C     | -7.424896 | 0.608163  | -1.797645 |
| S  | -1.229001 | -2.746929 | -0.552101 | H     | -7.824526 | 0.246761  | -2.746563 |
| O  | 0.167828  | -2.960572 | -0.227936 | C     | -6.722332 | -0.278614 | -0.982591 |
| O  | -1.667290 | -1.347469 | -0.899440 | C     | -5.946860 | 2.030493  | 1.976597  |
| O  | -2.265389 | -3.241261 | 0.424707  | H     | -6.758735 | 1.984659  | 2.716326  |
| C  | -1.562556 | -3.697872 | -2.099124 | H     | -5.628323 | 3.077724  | 1.919580  |
| F  | -0.749711 | -3.265839 | -3.057174 | H     | -5.118065 | 1.444856  | 2.388197  |
| F  | -2.830490 | -3.504214 | -2.466664 | C     | -8.336981 | 2.887433  | -2.351888 |
| F  | -1.355867 | -4.991706 | -1.880635 | H     | -8.818033 | 3.703503  | -1.801010 |
| S  | -5.959753 | -0.875711 | 0.008937  | H     | -9.100059 | 2.376828  | -2.950339 |
| O  | -5.305710 | -1.719516 | 1.074192  | H     | -7.634326 | 3.349474  | -3.059574 |

C -6.571076 -1.712306 -1.396034  
 H -5.737474 -2.215066 -0.894270  
 H -6.420529 -1.801402 -2.478227  
 H -7.475867 -2.287052 -1.152590  
 C -3.010529 -1.394602 -1.425985  
 O -3.131297 -2.244107 -2.192871  
 C -2.589290 1.404436 1.027864  
 O -2.462192 2.271071 1.773963  
 Mg 3.984208 0.397574 -0.292854  
 S 4.437128 -2.100963 -1.004282  
 O 3.860147 -3.134193 -1.842665  
 O 3.621287 -1.610432 0.165370  
 O 4.952987 -0.855039 -1.669701  
 C 5.937522 -2.840743 -0.223941  
 F 5.585827 -3.902292 0.496889  
 F 6.519370 -1.940482 0.566936  
 F 6.787916 -3.208674 -1.178281  
 S 5.762794 2.173793 0.512503  
 O 5.056610 2.149279 -0.814021  
 O 7.191202 2.419012 0.524608  
 O 5.253658 0.962605 1.251804  
 C 4.980427 3.591294 1.399292  
 F 5.278364 4.724719 0.770864  
 F 5.429827 3.640065 2.649774  
 F 3.654600 3.428623 1.412009

D0-C4

Mn 2.799195 -0.093037 0.286062  
 O 4.435412 -2.207575 1.559026  
 O 1.022306 -1.736312 1.988286  
 N 1.521884 1.405292 -0.547822  
 N 4.166036 1.035858 -0.891101  
 C 3.924973 -1.333819 0.994765  
 C 1.605234 -1.018036 1.288690  
 C 0.186241 1.545836 -0.369410  
 C -0.520298 2.606060 -0.936385  
 H -1.589521 2.670954 -0.758344  
 C 0.143520 3.541481 -1.712718  
 H -0.391184 4.372314 -2.165840  
 C 1.505909 3.393147 -1.904372  
 H 2.043346 4.109732 -2.514587  
 C 2.174958 2.321639 -1.311498  
 C 3.617494 2.126218 -1.490534  
 C 4.387136 3.011923 -2.244499  
 H 3.935318 3.881807 -2.706847  
 C 5.743004 2.777885 -2.402038  
 H 6.356280 3.460222 -2.985176  
 C 6.293737 1.656642 -1.805511  
 H 7.350539 1.422988 -1.906548  
 C 5.489351 0.797386 -1.053727  
 C -0.575170 0.564303 0.446171  
 C -0.857367 0.863831 1.797035  
 C -1.566253 -0.061281 2.562333  
 H -1.747535 0.152279 3.615840  
 C -2.004601 -1.278888 2.023898  
 C -1.807219 -1.502069 0.648852  
 H -2.103217 -2.461440 0.216588  
 C -1.096893 -0.591152 -0.157308  
 C -0.407942 2.157123 2.399454  
 H -0.965401 3.002630 1.973430  
 H 0.651899 2.358687 2.202105  
 H -0.564611 2.166980 3.482390  
 C -2.619612 -2.326198 2.897959  
 H -3.000351 -3.171222 2.316653  
 H -3.438366 -1.923913 3.506353  
 H -1.866307 -2.711785 3.597558  
 C -0.956316 -0.843926 -1.626020

H -0.990261 -1.913997 -1.855992  
 H -0.032602 -0.425214 -2.037279  
 H -1.779068 -0.366210 -2.177091  
 C 6.132952 -0.394782 -0.449934  
 C 6.782013 -0.281777 0.793721  
 C 7.451058 -1.396073 1.299916  
 H 7.941700 -1.318209 2.271554  
 C 7.496499 -2.606958 0.606385  
 C 6.870983 -2.680813 -0.641313  
 H 6.914131 -3.613138 -1.206652  
 C 6.202024 -1.589805 -1.194631  
 C 6.767050 0.995859 1.579268  
 H 7.730879 1.518005 1.502609  
 H 6.597023 0.802621 2.645460  
 H 5.998837 1.697515 1.237298  
 C 8.172429 -3.804846 1.197047  
 H 9.006591 -3.520869 1.848650  
 H 8.552717 -4.480548 0.422608  
 H 7.471339 -4.386489 1.812034  
 C 5.631326 -1.686123 -2.578326  
 H 4.797601 -0.996568 -2.748638  
 H 5.284091 -2.701900 -2.797812  
 H 6.395602 -1.440055 -3.329386  
 C 2.476829 -1.224085 -1.172547  
 O 2.283966 -1.963934 -2.032858  
 C 3.149233 1.071310 1.710919  
 O 3.366455 1.771296 2.598107  
 Mg -4.036728 -0.454989 0.384983  
 S -5.104124 -2.652070 -0.635566  
 O -4.704831 -4.019107 -0.913325  
 O -4.396444 -1.551558 -1.376775  
 O -5.121111 -2.213448 0.804146  
 C -6.862063 -2.507419 -1.177716  
 F -6.945052 -2.803921 -2.472498  
 F -7.296104 -1.264620 -0.978686  
 F -7.610082 -3.355520 -0.476114  
 S -4.856992 1.993870 -0.202948  
 O -5.598766 0.941556 0.573451  
 O -5.588678 2.756143 -1.194796  
 O -3.570916 1.335325 -0.627305  
 C -4.309391 3.194622 1.091330  
 F -5.353057 3.879788 1.545204  
 F -3.416311 4.034020 0.567499  
 F -3.743871 2.528184 2.100949

D0-Z2

Mn -2.766180 -0.087803 -0.306776  
 O -4.628785 0.707035 -2.468945  
 O -1.113396 0.839730 -2.580930  
 N -1.333805 -0.629786 1.179204  
 N -4.011420 -0.839828 1.247354  
 C -4.018624 0.355318 -1.549245  
 C -1.652609 0.463674 -1.625669  
 C 0.005205 -0.435205 1.143662  
 C 0.841768 -0.908803 2.155487  
 H 1.910563 -0.722388 2.078772  
 C 0.302084 -1.590981 3.233432  
 H 0.937010 -1.968848 4.030648  
 C -1.070051 -1.768816 3.282373  
 H -1.516783 -2.283051 4.125494  
 C -1.868333 -1.277767 2.249146  
 C -3.328500 -1.410584 2.276168  
 C -3.985151 -2.071317 3.313492  
 H -3.423048 -2.531096 4.118500  
 C -5.368525 -2.142076 3.311188  
 H -5.895662 -2.656397 4.110708  
 C -6.060297 -1.535643 2.276516

|       |           |           |           |    |           |           |           |
|-------|-----------|-----------|-----------|----|-----------|-----------|-----------|
| H     | -7.146511 | -1.548524 | 2.238363  | O  | -1.557568 | 0.370966  | 0.501690  |
| C     | -5.364279 | -0.889690 | 1.251700  | N  | 1.772715  | 2.624689  | -0.448760 |
| C     | 0.642620  | 0.322154  | 0.036146  | N  | 3.582209  | 0.545635  | -0.592536 |
| C     | 0.773699  | 1.720082  | 0.135914  | C  | 1.196490  | -1.464306 | 0.337412  |
| C     | 1.426775  | 2.417070  | -0.886002 | C  | -0.392879 | 0.502024  | 0.279742  |
| H     | 1.514740  | 3.501048  | -0.809043 | C  | 0.923317  | 3.638879  | -0.170449 |
| C     | 2.005295  | 1.760687  | -1.970291 | C  | 1.383489  | 4.943922  | 0.025314  |
| C     | 1.927972  | 0.351391  | -2.011086 | H  | 0.663886  | 5.732019  | 0.236450  |
| H     | 2.312669  | -0.178399 | -2.887473 | C  | 2.741631  | 5.219343  | -0.065847 |
| C     | 1.228866  | -0.378806 | -1.035607 | H  | 3.118026  | 6.225839  | 0.102801  |
| C     | 0.330031  | 2.461558  | 1.356046  | C  | 3.607418  | 4.186083  | -0.388367 |
| H     | 1.164685  | 2.514239  | 2.070298  | H  | 4.677469  | 4.360126  | -0.463256 |
| H     | -0.501082 | 1.979140  | 1.880104  | C  | 3.085371  | 2.904702  | -0.588302 |
| H     | 0.045081  | 3.491660  | 1.118107  | C  | 3.966258  | 1.788535  | -0.962479 |
| C     | 2.718823  | 2.504643  | -3.055244 | C  | 5.150293  | 2.028502  | -1.664969 |
| H     | 3.753375  | 2.150851  | -3.164731 | H  | 5.397754  | 3.036902  | -1.984813 |
| H     | 2.745115  | 3.580152  | -2.856887 | C  | 5.982355  | 0.963215  | -1.969629 |
| H     | 2.230017  | 2.345199  | -4.024536 | H  | 6.904283  | 1.120918  | -2.524905 |
| C     | 1.059731  | -1.857819 | -1.184659 | C  | 5.618369  | -0.305307 | -1.538928 |
| H     | 0.016276  | -2.095548 | -1.433231 | H  | 6.256409  | -1.167097 | -1.721594 |
| H     | 1.301173  | -2.405159 | -0.266049 | C  | 4.416724  | -0.487368 | -0.849950 |
| H     | 1.679930  | -2.251245 | -1.996419 | C  | -0.541323 | 3.387679  | -0.127403 |
| C     | -6.161169 | -0.226743 | 0.190067  | C  | -1.240466 | 3.518817  | 1.089321  |
| C     | -6.529623 | 1.124287  | 0.366328  | C  | -2.623040 | 3.337877  | 1.095430  |
| C     | -7.347169 | 1.723311  | -0.590216 | H  | -3.159148 | 3.416560  | 2.043611  |
| H     | -7.625070 | 2.770760  | -0.462642 | C  | -3.335191 | 3.046545  | -0.071704 |
| C     | -7.843935 | 1.010909  | -1.686311 | C  | -2.621831 | 2.937899  | -1.266846 |
| C     | -7.500581 | -0.335420 | -1.809594 | H  | -3.158959 | 2.710747  | -2.188945 |
| H     | -7.882363 | -0.908152 | -2.656454 | C  | -1.236729 | 3.107565  | -1.319955 |
| C     | -6.660674 | -0.971311 | -0.893708 | C  | -0.519694 | 3.813998  | 2.371677  |
| C     | -6.125737 | 1.891426  | 1.590388  | H  | -0.164225 | 4.852470  | 2.416268  |
| H     | -6.859979 | 1.747056  | 2.396009  | H  | 0.366045  | 3.178226  | 2.500021  |
| H     | -6.077991 | 2.967156  | 1.388929  | H  | -1.174685 | 3.656474  | 3.235313  |
| H     | -5.157956 | 1.577127  | 1.996390  | C  | -4.819964 | 2.851813  | -0.032744 |
| C     | -8.703924 | 1.683804  | -2.710323 | H  | -5.234405 | 2.699414  | -1.034805 |
| H     | -9.349122 | 2.447577  | -2.260993 | H  | -5.327425 | 3.714725  | 0.418005  |
| H     | -9.337452 | 0.965841  | -3.242938 | H  | -5.096658 | 1.979100  | 0.574512  |
| H     | -8.089780 | 2.193055  | -3.466076 | C  | -0.524842 | 3.035410  | -2.638075 |
| C     | -6.257274 | -2.394456 | -1.138586 | H  | -1.183053 | 2.645664  | -3.421871 |
| H     | -5.762698 | -2.857926 | -0.277939 | H  | 0.367086  | 2.400506  | -2.597518 |
| H     | -5.562121 | -2.455754 | -1.988463 | H  | -0.179655 | 4.029105  | -2.958785 |
| H     | -7.122936 | -3.013588 | -1.402560 | C  | 4.087764  | -1.845449 | -0.345337 |
| C     | -2.713641 | -1.853320 | -0.931430 | C  | 4.253529  | -2.133666 | 1.024675  |
| O     | -2.695064 | -2.941640 | -1.303775 | C  | 3.998657  | -3.429200 | 1.473050  |
| Mg    | 4.022855  | 0.150371  | -0.810423 | H  | 4.121962  | -3.651305 | 2.534657  |
| S     | 4.962237  | 1.676091  | 1.146184  | C  | 3.594141  | -4.445544 | 0.603794  |
| O     | 5.615935  | 1.575913  | 2.436603  | C  | 3.464555  | -4.140274 | -0.751589 |
| O     | 3.576344  | 1.109610  | 1.014036  | H  | 3.152480  | -4.921179 | -1.447460 |
| O     | 5.709397  | 1.181412  | -0.063014 | C  | 3.710865  | -2.857988 | -1.245851 |
| C     | 4.712601  | 3.481442  | 0.826317  | C  | 4.756320  | -1.098018 | 1.986426  |
| F     | 5.840249  | 4.144506  | 1.064809  | H  | 5.850450  | -1.003582 | 1.925219  |
| F     | 3.746322  | 3.934968  | 1.623260  | H  | 4.511724  | -1.364984 | 3.020552  |
| F     | 4.354449  | 3.668460  | -0.445398 | H  | 4.349712  | -0.101054 | 1.788376  |
| S     | 4.719850  | -2.399453 | -1.054932 | C  | 3.272024  | -5.813810 | 1.119885  |
| O     | 4.922393  | -1.291866 | -2.054434 | H  | 3.889398  | -6.078595 | 1.986258  |
| O     | 4.161297  | -3.647841 | -1.539420 | H  | 3.410318  | -6.582341 | 0.350791  |
| O     | 4.061508  | -1.744099 | 0.126864  | H  | 2.224236  | -5.873881 | 1.447212  |
| C     | 6.422987  | -2.806113 | -0.471349 | C  | 3.573613  | -2.589462 | -2.715784 |
| F     | 7.129698  | -3.288332 | -1.490862 | H  | 3.294001  | -1.552232 | -2.929497 |
| F     | 6.347035  | -3.722329 | 0.491235  | H  | 2.819421  | -3.243914 | -3.167988 |
| F     | 7.018409  | -1.713943 | 0.002818  | H  | 4.517440  | -2.776229 | -3.247821 |
| C     | -2.865149 | 1.653745  | 0.379141  | C  | 1.001940  | -0.048084 | -1.809792 |
| O     | -2.944803 | 2.744641  | 0.737361  | O  | 0.797647  | -0.312788 | -2.921019 |
| D1-O1 |           |           |           | C  | 1.745746  | 0.698816  | 1.746196  |
| Mn    | 1.317402  | 0.300317  | -0.014427 | O  | 2.000016  | 0.961889  | 2.848191  |
| O     | 0.879227  | -2.558431 | 0.589847  | Mg | -3.185368 | -0.842255 | 0.346441  |
|       |           |           |           | S  | -3.177981 | -0.874025 | -2.302808 |

O -2.556924 -0.142530 -3.390647  
O -4.080844 -0.099877 -1.376621  
O -2.304206 -1.705933 -1.411736  
C -4.312947 -2.099477 -3.087109  
F -5.209502 -1.462533 -3.837187  
F -4.945085 -2.793950 -2.138970  
F -3.609888 -2.935213 -3.848343  
S -3.037607 -1.347632 2.942941  
O -2.504773 -2.177333 1.806991  
O -3.671765 -2.050616 4.042605  
O -3.807970 -0.233156 2.292477  
C -1.508086 -0.523570 3.665447  
F -1.537011 -0.622762 4.990660  
F -1.459531 0.763263 3.327667  
F -0.419600 -1.136267 3.201922

#### D1-O2

Mn -1.063990 -1.422766 -0.002543  
O 0.933809 -3.406076 0.887116  
O -2.186531 -2.146701 2.625428  
N -2.517568 0.028864 -1.014527  
N -0.174628 -0.809965 -2.234589  
C 0.229756 -2.595433 0.428325  
C -1.871280 -1.781136 1.561789  
C -3.739391 0.334882 -0.515665  
C -4.699531 1.003416 -1.279060  
H -5.662382 1.230516 -0.827017  
C -4.417378 1.362167 -2.589037  
H -5.163270 1.858107 -3.206217  
C -3.156127 1.084134 -3.087343  
H -2.891910 1.347998 -4.107485  
C -2.221517 0.442454 -2.270734  
C -0.852268 0.226083 -2.760587  
C -0.294524 1.081746 -3.716800  
H -0.846165 1.950363 -4.066148  
C 0.986697 0.823644 -4.177450  
H 1.451276 1.475402 -4.914695  
C 1.661676 -0.286646 -3.684362  
H 2.653540 -0.548586 -4.047031  
C 1.059354 -1.083804 -2.707419  
C -4.092129 0.006734 0.891083  
C -3.638309 0.837128 1.933656  
C -4.047730 0.559909 3.238628  
H -3.688864 1.197599 4.048599  
C -4.901225 -0.505111 3.533736  
C -5.362107 -1.293586 2.477105  
H -6.034175 -2.127854 2.686336  
C -4.979515 -1.052482 1.157450  
C -2.772715 2.029366 1.655695  
H -3.378079 2.896049 1.350291  
H -2.063285 1.854255 0.841333  
H -2.206560 2.328231 2.545478  
C -5.281672 -0.817665 4.948017  
H -6.284253 -1.256221 5.013508  
H -5.254088 0.074458 5.584167  
H -4.587389 -1.546564 5.390025  
C -5.514972 -1.911850 0.050929  
H -5.851018 -2.883209 0.430671  
H -4.770876 -2.092709 -0.733643  
H -6.377919 -1.442921 -0.443139  
C 1.773701 -2.283266 -2.198601  
C 2.928808 -2.116135 -1.410615  
C 3.607878 -3.244982 -0.955373  
H 4.485238 -3.109687 -0.318960  
C 3.181646 -4.537029 -1.274295  
C 2.050738 -4.676781 -2.080464  
H 1.712014 -5.677543 -2.354965

C 1.336261 -3.572939 -2.552717  
C 3.401960 -0.747281 -1.028762  
H 3.787240 -0.183219 -1.889208  
H 4.203772 -0.797919 -0.286955  
H 2.587911 -0.144076 -0.607400  
C 3.899325 -5.736115 -0.735886  
H 4.986505 -5.592309 -0.730334  
H 3.675803 -6.638564 -1.316007  
H 3.604106 -5.938908 0.303413  
C 0.171856 -3.777938 -3.476204  
H -0.664862 -3.106857 -3.256325  
H -0.196521 -4.808644 -3.427494  
H 0.459075 -3.582986 -4.519813  
C -1.992457 -2.816573 -0.853476  
O -2.586050 -3.700293 -1.314860  
C -0.142382 -0.085780 0.764769  
O 0.422084 0.762560 1.373804  
Mg 1.711561 2.426605 1.337057  
S 3.751101 1.314859 2.660529  
O 4.986670 1.695805 3.318930  
O 3.634497 1.566386 1.183091  
O 2.461554 1.817093 3.245892  
C 3.654281 -0.525164 2.821658  
F 4.764620 -1.068141 2.322879  
F 2.600362 -0.997370 2.157551  
F 3.544161 -0.845508 4.108867  
S 0.253024 3.335583 -0.708417  
O 0.245020 3.788241 0.729646  
O -1.036764 3.016045 -1.294642  
O 1.359617 2.331527 -0.807433  
C 0.884076 4.781994 -1.660377  
F 0.026786 5.795234 -1.564037  
F 1.013398 4.425868 -2.938109  
F 2.070626 5.159238 -1.184208

#### D1-C1

Mn 2.060130 0.984549 0.057418  
O 4.685315 1.323055 -1.265704  
O 1.951249 3.428041 -1.609162  
N 0.146898 0.893157 0.948698  
N 2.257933 -0.778660 1.224682  
C 3.714646 1.063424 -0.683551  
C 1.853385 2.500026 -0.918093  
C -0.923144 1.684712 0.739564  
C -2.169652 1.451397 1.339242  
H -2.981676 2.150462 1.157799  
C -2.264073 0.460258 2.367014  
H -3.162041 0.373797 2.977780  
C -1.165501 -0.343203 2.600365  
H -1.216595 -1.098069 3.379479  
C 0.024097 -0.180822 1.850011  
C 1.139235 -1.058598 1.982214  
C 1.112873 -2.192863 2.826856  
H 0.225281 -2.412049 3.411922  
C 2.197415 -3.031207 2.893149  
H 2.178837 -3.907432 3.537775  
C 3.323686 -2.741513 2.112702  
H 4.206413 -3.375564 2.131347  
C 3.324149 -1.614442 1.298735  
C -0.796521 2.939251 -0.049656  
C -1.218006 3.006371 -1.392175  
C -1.145691 4.229135 -2.056464  
H -1.460626 4.278363 -3.100114  
C -0.676017 5.386576 -1.428161  
C -0.301688 5.301397 -0.087209  
H 0.043658 6.198340 0.429925  
C -0.367899 4.100419 0.622682

|       |           |           |           |    |           |           |           |
|-------|-----------|-----------|-----------|----|-----------|-----------|-----------|
| C     | -1.723609 | 1.791649  | -2.106528 | C  | -1.469447 | -0.017201 | 2.578790  |
| H     | -2.610070 | 1.366392  | -1.615502 | H  | -1.611532 | -0.907290 | 3.197692  |
| H     | -0.975993 | 0.989953  | -2.132065 | C  | -0.218771 | 0.194591  | 1.920723  |
| H     | -1.999118 | 2.027899  | -3.139866 | C  | 0.850177  | -0.737162 | 1.978342  |
| C     | -0.561533 | 6.674633  | -2.182715 | C  | 0.878076  | -1.801384 | 2.911509  |
| H     | -0.542461 | 7.539622  | -1.510343 | H  | 0.116900  | -1.855740 | 3.685546  |
| H     | -1.388862 | 6.806217  | -2.890126 | C  | 1.870367  | -2.747003 | 2.849496  |
| H     | 0.364979  | 6.704294  | -2.773165 | H  | 1.896094  | -3.569950 | 3.561510  |
| C     | -0.043073 | 4.091075  | 2.087755  | C  | 2.851748  | -2.632906 | 1.851604  |
| H     | 0.745533  | 4.814088  | 2.325799  | H  | 3.641218  | -3.372448 | 1.743617  |
| H     | 0.275189  | 3.108653  | 2.452328  | C  | 2.821160  | -1.549859 | 0.979237  |
| H     | -0.924418 | 4.373943  | 2.681179  | C  | -0.663903 | 3.653031  | 0.611040  |
| C     | 4.557725  | -1.342679 | 0.515471  | C  | -1.257790 | 4.070932  | -0.595644 |
| C     | 4.728944  | -1.942041 | -0.748491 | C  | -1.011141 | 5.362331  | -1.056033 |
| C     | 5.924642  | -1.730537 | -1.434384 | H  | -1.460292 | 5.677755  | -1.999487 |
| H     | 6.053514  | -2.182282 | -2.419690 | C  | -0.189326 | 6.252002  | -0.357882 |
| C     | 6.960903  | -0.965468 | -0.892148 | C  | 0.370509  | 5.822800  | 0.845713  |
| C     | 6.782254  | -0.418601 | 0.379457  | H  | 0.994127  | 6.509868  | 1.420338  |
| H     | 7.585907  | 0.170587  | 0.824978  | C  | 0.134524  | 4.543061  | 1.356214  |
| C     | 5.599128  | -0.596557 | 1.098468  | C  | -2.094151 | 3.129293  | -1.404300 |
| C     | 3.676832  | -2.834162 | -1.336722 | H  | -2.969311 | 2.769747  | -0.849588 |
| H     | 3.837735  | -3.879404 | -1.034556 | H  | -1.526872 | 2.232002  | -1.687239 |
| H     | 3.702090  | -2.811945 | -2.432424 | H  | -2.447317 | 3.605947  | -2.325271 |
| H     | 2.665385  | -2.571797 | -1.011671 | C  | 0.091981  | 7.619528  | -0.899416 |
| C     | 8.217773  | -0.718408 | -1.667928 | H  | 0.515034  | 8.280048  | -0.134464 |
| H     | 8.492257  | -1.582668 | -2.284128 | H  | -0.814215 | 8.092337  | -1.297296 |
| H     | 9.062012  | -0.482408 | -1.010243 | H  | 0.812030  | 7.577668  | -1.728386 |
| H     | 8.097187  | 0.132422  | -2.353284 | C  | 0.654211  | 4.186610  | 2.718185  |
| C     | 5.472516  | -0.014457 | 2.475528  | H  | 1.546844  | 4.770358  | 2.968503  |
| H     | 4.430602  | 0.103977  | 2.790981  | H  | 0.900102  | 3.124813  | 2.823083  |
| H     | 5.961502  | 0.964923  | 2.541035  | H  | -0.100625 | 4.406947  | 3.486962  |
| H     | 5.955245  | -0.660607 | 3.222593  | C  | 3.877717  | -1.482728 | -0.063391 |
| C     | 2.651738  | 1.958635  | 1.533553  | C  | 3.645824  | -2.076362 | -1.319513 |
| O     | 3.040343  | 2.564025  | 2.434414  | C  | 4.675558  | -2.077041 | -2.261225 |
| C     | 1.494523  | -0.059345 | -1.403646 | H  | 4.495518  | -2.528174 | -3.238800 |
| O     | 1.247024  | -0.648262 | -2.362268 | C  | 5.925005  | -1.516330 | -1.987402 |
| Mg    | -2.849230 | -0.874905 | 0.528100  | C  | 6.137846  | -0.959392 | -0.724049 |
| S     | -1.092514 | -2.559900 | -0.536754 | H  | 7.111705  | -0.525975 | -0.488520 |
| O     | 0.274685  | -3.023658 | -0.387779 | C  | 5.138297  | -0.940127 | 0.249270  |
| O     | -1.308753 | -1.106418 | -0.860567 | C  | 2.335314  | -2.732404 | -1.642047 |
| O     | -2.077416 | -2.869226 | 0.553574  | H  | 2.367757  | -3.808883 | -1.418698 |
| C     | -1.757797 | -3.429820 | -2.020230 | H  | 2.092471  | -2.637498 | -2.707311 |
| F     | -1.042345 | -3.082043 | -3.088097 | H  | 1.502532  | -2.317956 | -1.064327 |
| F     | -3.032121 | -3.084614 | -2.209175 | C  | 6.999250  | -1.484851 | -3.030525 |
| F     | -1.680644 | -4.746439 | -1.840899 | H  | 6.889212  | -2.301981 | -3.752614 |
| S     | -5.452371 | -1.108940 | 0.066510  | H  | 7.999633  | -1.550183 | -2.586917 |
| O     | -4.728631 | -1.524329 | 1.313541  | H  | 6.966836  | -0.546701 | -3.602431 |
| O     | -6.400996 | -2.039082 | -0.516362 | C  | 5.429288  | -0.372779 | 1.607329  |
| O     | -4.394845 | -0.534633 | -0.838604 | H  | 4.524105  | -0.046668 | 2.130416  |
| C     | -6.428113 | 0.366315  | 0.592358  | H  | 6.113564  | 0.481734  | 1.544831  |
| F     | -7.393693 | -0.010420 | 1.427268  | H  | 5.912144  | -1.120535 | 2.252715  |
| F     | -6.964178 | 0.951645  | -0.475629 | C  | 2.756441  | 2.024119  | 1.143015  |
| F     | -5.624606 | 1.232538  | 1.214200  | O  | 3.473005  | 2.542682  | 1.884451  |
| D1-C2 |           |           |           | C  | 0.569725  | 0.292924  | -1.355323 |
| Mn    | 1.671821  | 1.179026  | -0.115058 | O  | -0.081974 | -0.181576 | -2.178514 |
| O     | 3.931398  | 1.076138  | -2.020492 | Mg | -2.620746 | -1.371537 | 0.877453  |
| O     | 1.564312  | 3.640722  | -1.748163 | S  | -1.491622 | -3.389661 | -0.438094 |
| N     | -0.027148 | 1.343839  | 1.152121  | O  | -1.180146 | -3.828542 | -1.785293 |
| N     | 1.853902  | -0.603145 | 1.035445  | O  | -2.937619 | -3.258854 | -0.051088 |
| C     | 3.095480  | 0.983050  | -1.218752 | O  | -0.832083 | -2.137912 | 0.066129  |
| C     | 1.488963  | 2.720208  | -1.042997 | C  | -0.836436 | -4.688634 | 0.695727  |
| C     | -0.962463 | 2.317444  | 1.193949  | F  | -1.410445 | -5.858658 | 0.426142  |
| C     | -2.178914 | 2.164345  | 1.864546  | F  | -1.102784 | -4.350029 | 1.960750  |
| H     | -2.891162 | 2.984368  | 1.864512  | F  | 0.481710  | -4.791144 | 0.537715  |
| C     | -2.442852 | 0.965523  | 2.548028  | S  | -4.459544 | 0.156403  | -0.253476 |
| H     | -3.388644 | 0.817652  | 3.066622  | O  | -3.020978 | -0.008893 | -0.658968 |
|       |           |           |           | O  | -4.983371 | 1.504998  | -0.127179 |

O -4.660622 -0.776628 0.908209  
C -5.406572 -0.615148 -1.637054  
F -5.173688 0.065127 -2.758715  
F -6.707726 -0.575332 -1.355473  
F -5.028467 -1.880093 -1.801705

#### D1-C3

Mn 2.754849 -0.917597 -0.415648  
O 4.809732 -1.645841 -2.407817  
O 0.879016 -2.090345 -2.374396  
N 1.517606 -0.355098 1.457721  
N 4.194063 -0.131922 1.484828  
C 4.086000 -1.309701 -1.550270  
C 1.513487 -1.592770 -1.523810  
C 0.182719 -0.164350 1.448957  
C -0.572758 -0.126728 2.622716  
H -1.648539 0.022096 2.557536  
C 0.066557 -0.259840 3.847016  
H -0.497449 -0.226208 4.776263  
C 1.445811 -0.405142 3.863153  
H 1.982968 -0.457645 4.805849  
C 2.143751 -0.453293 2.654910  
C 3.615556 -0.549677 2.627221  
C 4.357161 -1.016869 3.713830  
H 3.863976 -1.389766 4.607444  
C 5.744103 -1.009461 3.623020  
H 6.351333 -1.369816 4.450503  
C 6.341824 -0.517958 2.469284  
H 7.424501 -0.455029 2.383294  
C 5.537122 -0.085212 1.409569  
C -0.499392 0.072565 0.149930  
C -1.264429 -0.942676 -0.442507  
C -1.943561 -0.662588 -1.646189  
H -2.454653 -1.481161 -2.162787  
C -1.827207 0.589664 -2.285249  
C -1.088848 1.586517 -1.642497  
H -1.023202 2.575695 -2.096068  
C -0.438164 1.355690 -0.428977  
C -1.330217 -2.313333 0.159186  
H -2.013264 -2.351362 1.019249  
H -0.344103 -2.629234 0.524924  
H -1.674476 -3.050442 -0.572610  
C -2.469400 0.840010 -3.613197  
H -2.735731 1.894667 -3.739031  
H -3.370828 0.231948 -3.753212  
H -1.778120 0.577888 -4.425230  
C 0.254841 2.478539 0.275691  
H 0.367890 3.349883 -0.376799  
H 1.246331 2.192285 0.646678  
H -0.327905 2.790310 1.154431  
C 6.128246 0.478688 0.172868  
C 7.011726 -0.290224 -0.606425  
C 7.545183 0.266894 -1.771767  
H 8.209907 -0.341701 -2.387346  
C 7.231363 1.561186 -2.183352  
C 6.354783 2.308625 -1.389168  
H 6.102697 3.328312 -1.686595  
C 5.797665 1.795309 -0.218921  
C 7.340398 -1.712727 -0.257132  
H 8.114875 -1.784416 0.518342  
H 7.714664 -2.248973 -1.136326  
H 6.463990 -2.256598 0.120146  
C 7.818168 2.144380 -3.432012  
H 8.390517 1.399770 -3.996135  
H 8.494525 2.979456 -3.204723  
H 7.041042 2.546420 -4.094449  
C 4.898366 2.664204 0.611860

H 3.862174 2.304358 0.621413  
H 4.891527 3.691447 0.230946  
H 5.219842 2.694757 1.661523  
C 2.648496 0.740274 -1.234865  
O 2.599639 1.718938 -1.862785  
C 3.008968 -2.565777 0.372525  
O 3.179238 -3.616047 0.844216  
Mg -3.918218 0.062538 -0.521713  
S -3.950192 2.639706 0.106549  
O -3.161804 3.839246 -0.105963  
O -3.328764 1.520472 0.895457  
O -4.572495 1.982413 -1.094442  
C -5.398603 3.155757 1.126238  
F -4.969547 3.674084 2.275106  
F -6.171895 2.100216 1.378953  
F -6.103294 4.069333 0.462056  
S -6.099956 -1.448638 -0.448300  
O -5.412361 -0.950239 -1.685219  
O -7.543379 -1.331230 -0.373002  
O -5.295913 -0.901522 0.701818  
C -5.724759 -3.254882 -0.423183  
F -6.320041 -3.848889 -1.453898  
F -6.165978 -3.785974 0.714164  
F -4.404737 -3.434630 -0.511821

#### D1-C4

Mn -3.131400 -0.369617 0.971145  
O -5.355129 0.706414 2.596680  
O -1.573993 0.052682 3.441865  
N -1.381574 -1.587465 -0.456562  
N -3.951782 -1.001388 -1.068979  
C -4.567679 0.283783 1.840961  
C -2.100399 -0.154213 2.414759  
C -0.157028 -1.895203 0.003396  
C 0.407992 -3.159088 -0.183556  
H 1.409255 -3.366457 0.188484  
C -0.323641 -4.130845 -0.856714  
H 0.084553 -5.128913 -0.999451  
C -1.581212 -3.808456 -1.351394  
H -2.176055 -4.552118 -1.875032  
C -2.070694 -2.516464 -1.144240  
C -3.372855 -2.069318 -1.674015  
C -3.940416 -2.694534 -2.784440  
H -3.431876 -3.529788 -3.257652  
C -5.139713 -2.218574 -3.293712  
H -5.603168 -2.693247 -4.155581  
C -5.713514 -1.105364 -2.699788  
H -6.635484 -0.673388 -3.082416  
C -5.092259 -0.506972 -1.599414  
C 0.580455 -0.811810 0.701183  
C 0.992809 -0.976026 2.040532  
C 1.663689 0.068218 2.684975  
H 1.946325 -0.055208 3.730629  
C 1.942153 1.277799 2.042431  
C 1.574257 1.400559 0.686495  
H 1.749119 2.348333 0.170539  
C 0.878999 0.379100 0.009257  
C 0.689092 -2.228161 2.804320  
H 1.395288 -3.032147 2.557299  
H -0.316765 -2.607963 2.583994  
H 0.760042 -2.050339 3.882233  
C 2.568571 2.421916 2.776340  
H 2.887351 3.215258 2.092369  
H 3.435732 2.103073 3.365778  
H 1.846346 2.856247 3.479940  
C 0.517764 0.573849 -1.431796  
H 1.062230 1.424354 -1.857518



|       |           |           |           |    |           |           |           |
|-------|-----------|-----------|-----------|----|-----------|-----------|-----------|
| H     | -0.554672 | 0.769850  | -1.555812 | C  | 5.083071  | 1.426512  | 0.564084  |
| H     | 0.743278  | -0.316652 | -2.031492 | C  | -0.789658 | -0.253118 | 0.282101  |
| C     | -5.682408 | 0.736894  | -1.042305 | C  | -1.408399 | -1.482250 | 0.612283  |
| C     | -6.811610 | 0.670825  | -0.206256 | C  | -1.985230 | -2.247036 | -0.413661 |
| C     | -7.371216 | 1.858238  | 0.261367  | H  | -2.452828 | -3.197982 | -0.161093 |
| H     | -8.232610 | 1.806448  | 0.929825  | C  | -1.941756 | -1.850393 | -1.757018 |
| C     | -6.840933 | 3.106885  | -0.078195 | C  | -1.328652 | -0.623141 | -2.057218 |
| C     | -5.734450 | 3.144263  | -0.928895 | H  | -1.320499 | -0.270494 | -3.088262 |
| H     | -5.316322 | 4.109509  | -1.219970 | C  | -0.741221 | 0.178901  | -1.067068 |
| C     | -5.153097 | 1.978441  | -1.435181 | C  | -1.421242 | -2.009387 | 2.014763  |
| C     | -7.369555 | -0.655071 | 0.215586  | H  | -2.216848 | -1.556720 | 2.619400  |
| H     | -7.847543 | -1.185848 | -0.619398 | H  | -0.471623 | -1.806278 | 2.525009  |
| H     | -8.119749 | -0.536435 | 1.005056  | H  | -1.584793 | -3.091243 | 2.013282  |
| H     | -6.581443 | -1.320541 | 0.597445  | C  | -2.554373 | -2.688629 | -2.830804 |
| C     | -7.447767 | 4.366386  | 0.460342  | H  | -3.054187 | -2.070070 | -3.584514 |
| H     | -7.374796 | 4.410869  | 1.555091  | H  | -3.280945 | -3.396831 | -2.420498 |
| H     | -8.516130 | 4.435494  | 0.217861  | H  | -1.779577 | -3.266965 | -3.350782 |
| H     | -6.953508 | 5.257482  | 0.058118  | C  | -0.138222 | 1.493426  | -1.456740 |
| C     | -4.024996 | 2.063356  | -2.420741 | H  | 0.957157  | 1.439526  | -1.466037 |
| H     | -3.230176 | 1.334758  | -2.218752 | H  | -0.403156 | 2.290430  | -0.752768 |
| H     | -3.574712 | 3.061703  | -2.424172 | H  | -0.466314 | 1.787770  | -2.459114 |
| H     | -4.380004 | 1.859079  | -3.441278 | C  | 5.780346  | 0.599764  | -0.453615 |
| C     | -2.562637 | 1.312046  | 0.440495  | C  | 6.784801  | -0.301261 | -0.066610 |
| O     | -2.187269 | 2.394958  | 0.237262  | C  | 7.455957  | -1.024268 | -1.054803 |
| C     | -3.484026 | -2.085770 | 1.546633  | H  | 8.220832  | -1.742073 | -0.753758 |
| O     | -3.697881 | -3.160489 | 1.939505  | C  | 7.155982  | -0.873405 | -2.409415 |
| Mg    | 3.730998  | 0.450812  | 0.148655  | C  | 6.165412  | 0.047081  | -2.768677 |
| S     | 5.617670  | 2.201753  | -0.482098 | H  | 5.926046  | 0.192135  | -3.823913 |
| O     | 7.063582  | 2.284577  | -0.560236 | C  | 5.482608  | 0.802262  | -1.815403 |
| O     | 4.994127  | 1.993500  | 0.868491  | C  | 7.097053  | -0.520656 | 1.383020  |
| O     | 4.924563  | 1.226794  | -1.394685 | H  | 7.590821  | 0.350949  | 1.834632  |
| C     | 4.979265  | 3.850483  | -1.008554 | H  | 7.758893  | -1.382875 | 1.519444  |
| F     | 5.371058  | 4.106140  | -2.253841 | H  | 6.184310  | -0.700474 | 1.969572  |
| F     | 5.450596  | 4.787440  | -0.189705 | C  | 7.876996  | -1.665918 | -3.456609 |
| F     | 3.645242  | 3.852414  | -0.956374 | H  | 7.180555  | -2.257386 | -4.065028 |
| S     | 4.299068  | -2.142829 | 0.260212  | H  | 8.602733  | -2.355909 | -3.012489 |
| O     | 3.459651  | -1.454907 | -0.778004 | H  | 8.419449  | -1.012947 | -4.153099 |
| O     | 3.781154  | -3.367767 | 0.844556  | C  | 4.493088  | 1.846068  | -2.242924 |
| O     | 4.743405  | -1.054201 | 1.199071  | H  | 3.579957  | 1.839002  | -1.634779 |
| C     | 5.841666  | -2.617448 | -0.635798 | H  | 4.202011  | 1.712237  | -3.290192 |
| F     | 5.533252  | -3.441135 | -1.634976 | H  | 4.920710  | 2.854501  | -2.145917 |
| F     | 6.671727  | -3.228842 | 0.205453  | C  | 2.662175  | -0.705875 | -1.298862 |
| F     | 6.430219  | -1.527614 | -1.125020 | O  | 2.499843  | -0.709644 | -2.451586 |
| D1-Z2 |           |           |           | Mg | -3.346661 | 0.013844  | -0.560959 |
| Mn    | 2.876685  | -0.932697 | 0.527036  | S  | -5.580558 | -1.218574 | 0.207210  |
| O     | 5.031482  | -2.925548 | 0.155705  | O  | -6.987517 | -0.880919 | 0.322936  |
| O     | 1.073469  | -3.254544 | 0.258691  | O  | -4.609268 | -0.453151 | 1.065208  |
| N     | 1.141076  | 0.855436  | 1.172693  | O  | -4.977326 | -1.207587 | -1.168114 |
| N     | 3.824573  | 1.105620  | 0.937313  | C  | -5.438368 | -2.996388 | 0.783720  |
| C     | 4.280832  | -2.039685 | 0.299020  | F  | -6.519815 | -3.322812 | 1.483672  |
| C     | 1.705662  | -2.274362 | 0.381253  | F  | -4.362359 | -3.146688 | 1.554738  |
| C     | -0.161217 | 0.576243  | 1.341639  | F  | -5.336514 | -3.801227 | -0.272029 |
| C     | -0.886410 | 1.043976  | 2.439281  | S  | -3.572419 | 2.607846  | -1.172465 |
| H     | -1.944224 | 0.808064  | 2.536678  | O  | -3.807963 | 1.436608  | -2.082044 |
| C     | -0.235016 | 1.818629  | 3.392503  | O  | -2.867746 | 3.758240  | -1.706399 |
| H     | -0.769497 | 2.182488  | 4.266906  | O  | -3.081231 | 2.017515  | 0.118860  |
| C     | 1.107349  | 2.126747  | 3.209989  | C  | -5.273229 | 3.188441  | -0.758521 |
| H     | 1.640085  | 2.724182  | 3.945014  | F  | -5.869557 | 3.662082  | -1.849720 |
| C     | 1.759785  | 1.637112  | 2.075330  | F  | -5.208679 | 4.145023  | 0.164465  |
| C     | 3.169472  | 1.949848  | 1.774108  | F  | -5.982444 | 2.161919  | -0.279314 |
| C     | 3.766779  | 3.098863  | 2.292167  | C  | 2.880848  | -1.208767 | 2.351140  |
| H     | 3.198392  | 3.764642  | 2.935323  | O  | 2.871980  | -1.418387 | 3.495865  |
| C     | 5.078147  | 3.396471  | 1.951127  | E1 |           |           |           |
| H     | 5.566306  | 4.284111  | 2.347000  | Mn | -1.339478 | -0.367694 | 0.223599  |
| C     | 5.736927  | 2.555184  | 1.068354  | O  | -0.318143 | -2.432289 | 2.055196  |
| H     | 6.753855  | 2.762468  | 0.742758  | O  | -0.426180 | 1.225854  | 2.532531  |

|    |           |           |           |         |           |           |           |
|----|-----------|-----------|-----------|---------|-----------|-----------|-----------|
| N  | -1.772105 | 1.159701  | -1.144812 | C       | 1.865060  | 3.841383  | -1.273906 |
| N  | -1.001373 | -1.282063 | -1.608721 | F       | 1.880529  | 4.822518  | -0.368941 |
| C  | -0.681904 | -1.660185 | 1.243104  | F       | 0.600393  | 3.546226  | -1.575165 |
| C  | -0.784716 | 0.665348  | 1.549201  | F       | 2.485429  | 4.254898  | -2.379951 |
| C  | -2.399879 | 2.346379  | -0.894878 | S       | 3.845633  | -1.231670 | 1.196064  |
| C  | -2.549919 | 3.317265  | -1.878534 | O       | 2.403662  | -0.851137 | 1.424439  |
| H  | -3.059340 | 4.243930  | -1.621492 | O       | 4.402423  | -0.624781 | -0.020274 |
| C  | -2.082821 | 3.089814  | -3.172360 | O       | 4.120360  | -2.644610 | 1.446070  |
| H  | -2.197961 | 3.841646  | -3.949657 | C       | 4.672187  | -0.341861 | 2.578991  |
| C  | -1.502291 | 1.867105  | -3.449567 | F       | 4.208206  | -0.774619 | 3.756563  |
| H  | -1.170955 | 1.634210  | -4.457348 | F       | 4.459225  | 0.974197  | 2.493466  |
| C  | -1.369760 | 0.915429  | -2.431943 | F       | 5.991314  | -0.563749 | 2.531630  |
| C  | -0.873539 | -0.425175 | -2.674179 | C       | 2.789866  | -1.311049 | -2.250721 |
| C  | -0.324996 | -0.828907 | -3.895654 | O       | 1.980694  | -1.473762 | -1.414827 |
| H  | -0.180037 | -0.104590 | -4.692238 | O       | 3.573197  | -1.187939 | -3.100709 |
| C  | 0.026248  | -2.154319 | -4.084476 |         |           |           |           |
| H  | 0.466215  | -2.488294 | -5.021172 | TS-E1E2 |           |           |           |
| C  | -0.268389 | -3.058391 | -3.063585 | Mn      | -1.107785 | 0.308310  | 0.187397  |
| H  | -0.111994 | -4.126503 | -3.201765 | O       | -1.381256 | -2.516385 | 1.004847  |
| C  | -0.798116 | -2.615463 | -1.857526 | O       | 1.173327  | 0.391108  | 2.065516  |
| C  | -3.027690 | 2.585130  | 0.432455  | N       | -0.768375 | 2.173717  | -0.701904 |
| C  | -2.398146 | 3.391132  | 1.394595  | N       | -2.419170 | 0.293539  | -1.447794 |
| C  | -3.047773 | 3.624304  | 2.609318  | C       | -1.278808 | -1.415718 | 0.608461  |
| H  | -2.548335 | 4.234996  | 3.363787  | C       | 0.319219  | 0.374940  | 1.245966  |
| C  | -4.310165 | 3.096486  | 2.884036  | C       | -0.168985 | 3.278933  | -0.165834 |
| C  | -4.935431 | 2.335059  | 1.891264  | C       | 0.187591  | 4.368704  | -0.954257 |
| H  | -5.933272 | 1.931370  | 2.074293  | H       | 0.672852  | 5.218178  | -0.478122 |
| C  | -4.322654 | 2.080617  | 0.664720  | C       | -0.105978 | 4.380961  | -2.315852 |
| C  | -1.052067 | 3.992079  | 1.127338  | H       | 0.183408  | 5.219625  | -2.944744 |
| H  | -0.347970 | 3.247163  | 0.741700  | C       | -0.840309 | 3.328794  | -2.830459 |
| H  | -0.619038 | 4.417804  | 2.039771  | H       | -1.159401 | 3.342809  | -3.867902 |
| H  | -1.106538 | 4.795586  | 0.378972  | C       | -1.192923 | 2.258638  | -2.001156 |
| C  | -4.980591 | 3.334939  | 4.202773  | C       | -2.126475 | 1.225319  | -2.408253 |
| H  | -6.022566 | 3.655104  | 4.076449  | C       | -2.753238 | 1.237153  | -3.658562 |
| H  | -4.459624 | 4.100382  | 4.788698  | H       | -2.477089 | 1.981630  | -4.399032 |
| H  | -5.007761 | 2.419841  | 4.810028  | C       | -3.730518 | 0.304552  | -3.943755 |
| C  | -5.055628 | 1.323062  | -0.402395 | H       | -4.222654 | 0.288004  | -4.913299 |
| H  | -5.937792 | 0.817257  | 0.005153  | C       | -4.109442 | -0.573136 | -2.929541 |
| H  | -4.423766 | 0.563722  | -0.881091 | H       | -4.926267 | -1.277513 | -3.073359 |
| H  | -5.399811 | 1.996178  | -1.200930 | C       | -3.465969 | -0.547973 | -1.697211 |
| C  | -1.271162 | -3.625248 | -0.875237 | C       | -0.010979 | 3.405852  | 1.307277  |
| C  | -0.382694 | -4.474557 | -0.191888 | C       | 1.261044  | 3.419220  | 1.906949  |
| C  | -0.902338 | -5.452962 | 0.661081  | C       | 1.358998  | 3.627845  | 3.283770  |
| H  | -0.207186 | -6.099116 | 1.200252  | H       | 2.347390  | 3.619115  | 3.746842  |
| C  | -2.272555 | -5.613131 | 0.858956  | C       | 0.232185  | 3.833425  | 4.081693  |
| C  | -3.138918 | -4.775785 | 0.147642  | C       | -1.017198 | 3.864171  | 3.456423  |
| H  | -4.217612 | -4.903855 | 0.258149  | H       | -1.909827 | 4.061097  | 4.053381  |
| C  | -2.666930 | -3.800955 | -0.729645 | C       | -1.159832 | 3.674638  | 2.081056  |
| C  | 1.103247  | -4.303918 | -0.286389 | C       | 2.495210  | 3.177735  | 1.094200  |
| H  | 1.458625  | -4.203330 | -1.318718 | H       | 2.434382  | 2.223764  | 0.559556  |
| H  | 1.624774  | -5.153069 | 0.169794  | H       | 3.387123  | 3.144176  | 1.730329  |
| H  | 1.425603  | -3.399864 | 0.247395  | H       | 2.655773  | 3.956971  | 0.336964  |
| C  | -2.809574 | -6.660480 | 1.785633  | C       | 0.355823  | 4.010808  | 5.564048  |
| H  | -2.003897 | -7.225112 | 2.267678  | H       | -0.367711 | 4.739722  | 5.948519  |
| H  | -3.450300 | -7.378067 | 1.255945  | H       | 1.360605  | 4.342140  | 5.850143  |
| H  | -3.428532 | -6.218546 | 2.577456  | H       | 0.165000  | 3.068082  | 6.095643  |
| C  | -3.641434 | -3.004423 | -1.546427 | C       | -2.508251 | 3.846912  | 1.444943  |
| H  | -3.489796 | -3.171112 | -2.622470 | H       | -3.304133 | 3.841543  | 2.198153  |
| H  | -3.537209 | -1.924330 | -1.379171 | H       | -2.734130 | 3.062924  | 0.712240  |
| H  | -4.673722 | -3.283942 | -1.307937 | H       | -2.566830 | 4.805822  | 0.909222  |
| C  | -2.959068 | -0.767386 | 0.861802  | C       | -4.013804 | -1.400211 | -0.610363 |
| O  | -3.905750 | -1.099946 | 1.481131  | C       | -3.887271 | -2.798180 | -0.638304 |
| Mg | 1.278827  | 0.170960  | 0.117539  | C       | -4.503177 | -3.554688 | 0.365244  |
| S  | 2.725842  | 2.357536  | -0.593409 | H       | -4.390496 | -4.640459 | 0.346325  |
| O  | 4.133446  | 2.718095  | -0.587050 | C       | -5.234326 | -2.964401 | 1.392498  |
| O  | 2.286159  | 1.243476  | -1.499615 | C       | -5.375147 | -1.570989 | 1.381693  |
| O  | 2.059252  | 2.107139  | 0.721891  | H       | -5.976147 | -1.088115 | 2.154873  |

C -4.799402 -0.781162 0.389684  
 C -3.059868 -3.511256 -1.665833  
 H -2.781264 -2.870967 -2.509469  
 H -3.590914 -4.382045 -2.070045  
 H -2.132210 -3.889326 -1.215558  
 C -5.864130 -3.787495 2.474216  
 H -5.760093 -4.860445 2.278402  
 H -6.933751 -3.565546 2.581665  
 H -5.405454 -3.583619 3.451153  
 C -5.101066 0.688137 0.341451  
 H -5.830967 0.908677 -0.451354  
 H -4.213409 1.295562 0.130152  
 H -5.529295 1.035643 1.288249  
 C -2.144914 0.701669 1.572580  
 O -2.701796 0.797103 2.604210  
 Mg 1.484957 -1.175842 -0.380751  
 S 3.586770 -0.036258 -1.662406  
 O 4.935406 -0.470346 -1.993166  
 O 2.440321 -0.687328 -2.362554  
 O 3.222980 0.035104 -0.207687  
 C 3.502957 1.714905 -2.223891  
 F 4.360929 2.463161 -1.525704  
 F 2.267990 2.191865 -2.052268  
 F 3.816892 1.785588 -3.519253  
 S 2.594391 -3.439456 0.751016  
 O 1.600398 -2.433811 1.262069  
 O 3.075851 -2.961902 -0.568120  
 O 2.223080 -4.842091 0.885137  
 C 4.020918 -3.226876 1.897455  
 F 3.649098 -3.545027 3.140594  
 F 4.455434 -1.965504 1.887811  
 F 5.021242 -4.030660 1.524572  
 C -0.229502 -1.647944 -2.264096  
 O 0.340032 -2.519123 -1.645878  
 O -0.698834 -1.168449 -3.235612  
  
 E2  
 Mn 1.737614 -0.339264 0.260838  
 O 0.827157 2.423250 0.657321  
 O -0.937701 -0.319969 1.382434  
 N 2.145819 -2.340668 -0.224652  
 N 3.327204 -0.128627 -1.118050  
 C 1.289941 1.376053 0.418774  
 C 0.183129 -0.488505 1.011703  
 C 1.622893 -3.454919 0.343891  
 C 1.908212 -4.730494 -0.141581  
 H 1.460030 -5.589637 0.352371  
 C 2.747399 -4.884616 -1.236463  
 H 2.980639 -5.871674 -1.629046  
 C 3.294563 -3.750269 -1.809096  
 H 3.970720 -3.843577 -2.652260  
 C 2.982914 -2.492067 -1.287087  
 C 3.592470 -1.270006 -1.808362  
 C 4.442949 -1.285385 -2.917357  
 H 4.628516 -2.208044 -3.457207  
 C 5.042418 -0.110845 -3.334027  
 H 5.695239 -0.099586 -4.203881  
 C 4.814368 1.043649 -2.596765  
 H 5.293878 1.984259 -2.857999  
 C 3.969273 1.006721 -1.488270  
 C 0.712920 -3.342972 1.511790  
 C -0.676374 -3.431649 1.305029  
 C -1.523427 -3.384707 2.411070  
 H -2.601780 -3.435473 2.249841  
 C -1.028431 -3.247883 3.711578  
 C 0.355881 -3.190594 3.890002  
 H 0.761515 -3.113208 4.900367

C 1.241401 -3.257063 2.810828  
 C -1.230611 -3.526267 -0.083992  
 H -0.991212 -2.624496 -0.667211  
 H -2.319177 -3.626625 -0.073457  
 H -0.811784 -4.377266 -0.637792  
 C -1.961895 -3.152521 4.879532  
 H -1.448933 -3.354168 5.826638  
 H -2.799867 -3.854176 4.787757  
 H -2.401627 -2.148424 4.956086  
 C 2.721133 -3.315856 3.047779  
 H 2.990196 -2.881013 4.016373  
 H 3.293897 -2.794775 2.271609  
 H 3.071908 -4.358292 3.050051  
 C 3.836128 2.246688 -0.682434  
 C 3.063938 3.316955 -1.163235  
 C 3.031705 4.505412 -0.432209  
 H 2.417737 5.330998 -0.796099  
 C 3.736955 4.654642 0.762905  
 C 4.506230 3.577499 1.215012  
 H 5.080150 3.679401 2.137971  
 C 4.585590 2.380039 0.503221  
 C 2.235524 3.166242 -2.403979  
 H 1.626368 2.250932 -2.371519  
 H 2.851393 3.097693 -3.311184  
 H 1.554914 4.015387 -2.530175  
 C 3.665820 5.926838 1.550839  
 H 3.172834 6.725517 0.985717  
 H 4.663264 6.281027 1.840224  
 H 3.102222 5.788307 2.483479  
 C 5.514841 1.293779 0.958601  
 H 6.443740 1.303746 0.369818  
 H 5.083922 0.292175 0.844233  
 H 5.793362 1.423843 2.009983  
 C 2.673525 -0.232606 1.819141  
 O 3.073601 -0.026078 2.899480  
 Mg -2.189197 0.527999 -0.227283  
 S -4.355821 -0.825685 -1.079412  
 O -5.784037 -0.920440 -0.814369  
 O -3.839075 0.456999 -1.645909  
 O -3.420288 -1.223797 0.017517  
 C -4.032255 -2.073519 -2.396703  
 F -4.349795 -3.290616 -1.943763  
 F -2.744868 -2.065728 -2.746095  
 F -4.775829 -1.803278 -3.472425  
 S -2.922098 2.857547 0.938703  
 O -3.323360 1.480569 1.367190  
 O -2.135743 2.693825 -0.322365  
 O -2.391797 3.751709 1.957583  
 C -4.501800 3.649313 0.412596  
 F -5.305017 3.778310 1.472263  
 F -5.121082 2.917746 -0.511679  
 F -4.247820 4.860803 -0.089703  
 C 0.428147 -0.375639 -1.521303  
 O -0.746535 0.156219 -1.475067  
 O 0.906569 -0.912261 -2.521806  
  
 F  
 Mn -1.819946 0.071878 -0.192733  
 O -4.790167 0.377817 -0.160949  
 O -2.003662 -0.889075 -2.963400  
 O -1.621753 2.525126 -1.798638  
 N -1.245271 0.736865 1.753896  
 N -1.497748 -1.733887 0.897888  
 C -3.636929 0.215890 -0.055250  
 C -1.952379 -0.598117 -1.831611  
 C -1.710700 1.608080 -1.077786  
 C -1.266630 2.006688 2.212658

|    |           |           |           |
|----|-----------|-----------|-----------|
| C  | -0.476460 | 2.402177  | 3.294833  |
| H  | -0.516306 | 3.437797  | 3.624617  |
| C  | 0.330791  | 1.474171  | 3.936442  |
| H  | 0.962230  | 1.767480  | 4.772008  |
| C  | 0.292555  | 0.154329  | 3.512423  |
| H  | 0.890930  | -0.597912 | 4.016697  |
| C  | -0.511613 | -0.187328 | 2.425497  |
| C  | -0.656235 | -1.567682 | 1.951208  |
| C  | -0.010997 | -2.644215 | 2.558146  |
| H  | 0.674268  | -2.485201 | 3.384710  |
| C  | -0.244467 | -3.927173 | 2.086067  |
| H  | 0.265783  | -4.779284 | 2.529547  |
| C  | -1.163562 | -4.100800 | 1.062182  |
| H  | -1.419254 | -5.092680 | 0.696603  |
| C  | -1.790627 | -2.988844 | 0.493964  |
| C  | -2.193559 | 2.988631  | 1.598079  |
| C  | -3.577066 | 2.874899  | 1.849002  |
| C  | -4.437958 | 3.819114  | 1.291728  |
| H  | -5.509802 | 3.727618  | 1.477833  |
| C  | -3.964488 | 4.884988  | 0.517988  |
| C  | -2.588534 | 4.991903  | 0.316211  |
| H  | -2.200032 | 5.812970  | -0.288932 |
| C  | -1.689348 | 4.063303  | 0.847476  |
| C  | -4.119126 | 1.803970  | 2.749602  |
| H  | -3.832432 | 1.987478  | 3.795219  |
| H  | -3.741904 | 0.806321  | 2.495105  |
| H  | -5.213191 | 1.770166  | 2.707970  |
| C  | -4.915382 | 5.884693  | -0.065900 |
| H  | -4.392155 | 6.638795  | -0.663973 |
| H  | -5.477355 | 6.410534  | 0.717393  |
| H  | -5.661047 | 5.402572  | -0.711387 |
| C  | -0.219762 | 4.190241  | 0.576153  |
| H  | -0.035421 | 4.853980  | -0.276524 |
| H  | 0.237633  | 3.215223  | 0.359450  |
| H  | 0.317423  | 4.612287  | 1.437736  |
| C  | -2.848737 | -3.199304 | -0.524177 |
| C  | -4.194803 | -3.001011 | -0.162216 |
| C  | -5.186406 | -3.236112 | -1.117624 |
| H  | -6.230285 | -3.075596 | -0.842049 |
| C  | -4.880525 | -3.686362 | -2.403908 |
| C  | -3.538293 | -3.910749 | -2.722698 |
| H  | -3.277349 | -4.260648 | -3.723286 |
| C  | -2.514980 | -3.679201 | -1.804001 |
| C  | -4.578313 | -2.612778 | 1.235637  |
| H  | -4.398186 | -3.440375 | 1.936944  |
| H  | -5.641172 | -2.354620 | 1.295637  |
| H  | -4.003090 | -1.757539 | 1.610088  |
| C  | -5.957605 | -3.922893 | -3.418147 |
| H  | -6.956031 | -3.802381 | -2.983522 |
| H  | -5.894832 | -4.931628 | -3.846100 |
| H  | -5.876268 | -3.222926 | -4.260466 |
| C  | -1.082381 | -3.893353 | -2.191407 |
| H  | -0.978548 | -3.972835 | -3.279498 |
| H  | -0.675323 | -4.817556 | -1.757296 |
| H  | -0.442909 | -3.069845 | -1.844462 |
| C  | 0.241407  | -0.031966 | -0.462755 |
| O  | 0.998360  | 0.948629  | -0.107792 |
| O  | 0.817691  | -1.084883 | -0.929655 |
| Mg | 2.619164  | -0.189381 | -0.550568 |
| S  | 4.181758  | 1.451630  | -1.995124 |
| O  | 5.482754  | 1.504315  | -2.645429 |
| O  | 4.161322  | 1.318960  | -0.504388 |
| O  | 3.176913  | 0.482812  | -2.532231 |
| C  | 3.425676  | 3.104515  | -2.309553 |
| F  | 3.328246  | 3.308600  | -3.625807 |
| F  | 4.197041  | 4.056852  | -1.777958 |
| F  | 2.210309  | 3.178861  | -1.768065 |
| S  | 3.805512  | -2.148287 | 0.860375  |
| O  | 3.917083  | -1.920623 | -0.615135 |
| O  | 3.444770  | -3.485830 | 1.308508  |
| O  | 3.032669  | -0.997726 | 1.421221  |
| C  | 5.521178  | -1.894560 | 1.483527  |
| F  | 6.323487  | -2.835702 | 0.979737  |
| F  | 5.530978  | -1.982094 | 2.816508  |
| F  | 5.981920  | -0.696286 | 1.125687  |
| G1 |           |           |           |
| Mn | 2.300453  | 0.403215  | -0.092097 |
| O  | 5.066252  | 1.400480  | 0.387433  |
| O  | 2.070485  | 2.115018  | -2.464123 |
| O  | 3.418881  | -1.061372 | -2.375320 |
| N  | 2.090595  | -1.067955 | 1.417316  |
| N  | 1.282928  | 1.480905  | 1.431913  |
| C  | 3.962520  | 1.012918  | 0.319512  |
| C  | 2.121802  | 1.532948  | -1.449752 |
| C  | 2.984876  | -0.586061 | -1.398464 |
| C  | 2.543614  | -2.345704 | 1.396341  |
| C  | 2.103411  | -3.297621 | 2.316779  |
| H  | 2.490181  | -4.311636 | 2.244718  |
| C  | 1.194000  | -2.942130 | 3.302221  |
| H  | 0.830366  | -3.673355 | 4.020459  |
| C  | 0.776580  | -1.624157 | 3.363419  |
| H  | 0.081496  | -1.314631 | 4.136516  |
| C  | 1.243166  | -0.707137 | 2.418307  |
| C  | 0.854246  | 0.703052  | 2.461873  |
| C  | 0.108763  | 1.218747  | 3.524324  |
| H  | -0.201374 | 0.578859  | 4.342572  |
| C  | -0.239155 | 2.558130  | 3.529987  |
| H  | -0.829454 | 2.975101  | 4.342834  |
| C  | 0.197496  | 3.352548  | 2.481075  |
| H  | -0.037110 | 4.413883  | 2.440712  |
| C  | 0.965226  | 2.796554  | 1.455567  |
| C  | 3.567154  | -2.777052 | 0.410415  |
| C  | 4.921924  | -2.487382 | 0.649813  |
| C  | 5.881010  | -2.985134 | -0.236916 |
| H  | 6.933053  | -2.757625 | -0.055816 |
| C  | 5.532082  | -3.783661 | -1.327708 |
| C  | 4.179345  | -4.075931 | -1.526837 |
| H  | 3.884685  | -4.689038 | -2.380564 |
| C  | 3.189433  | -3.583503 | -0.679283 |
| C  | 5.347193  | -1.724291 | 1.869149  |
| H  | 5.339487  | -2.371079 | 2.758698  |
| H  | 4.683268  | -0.880756 | 2.090928  |
| H  | 6.364971  | -1.333964 | 1.759560  |
| C  | 6.573152  | -4.297713 | -2.274549 |
| H  | 6.557972  | -3.743495 | -3.223175 |
| H  | 6.406611  | -5.352168 | -2.527116 |
| H  | 7.582301  | -4.202042 | -1.858483 |
| C  | 1.740293  | -3.841908 | -0.964558 |
| H  | 1.611633  | -4.390276 | -1.904351 |
| H  | 1.188819  | -2.893274 | -1.049197 |
| H  | 1.251188  | -4.420679 | -0.169141 |
| C  | 1.429430  | 3.721296  | 0.388944  |
| C  | 2.665076  | 4.375544  | 0.522228  |
| C  | 3.031426  | 5.318909  | -0.442930 |
| H  | 3.995613  | 5.821717  | -0.348426 |
| C  | 2.188376  | 5.650969  | -1.504759 |
| C  | 0.951463  | 5.004134  | -1.595118 |
| H  | 0.282320  | 5.242942  | -2.423875 |
| C  | 0.557979  | 4.041392  | -0.668642 |
| C  | 3.549623  | 4.127573  | 1.707996  |
| H  | 4.594149  | 4.372548  | 1.485875  |
| H  | 3.512503  | 3.087433  | 2.051388  |
| H  | 3.244532  | 4.751640  | 2.560741  |

C 2.598392 6.661973 -2.531745  
H 3.511269 7.191466 -2.237042  
H 1.812517 7.408994 -2.700660  
H 2.791733 6.189019 -3.504201  
C -0.746893 3.318644 -0.816827  
H -1.224695 3.547972 -1.775683  
H -1.458244 3.579775 -0.019859  
H -0.610752 2.228769 -0.760522  
C 0.393269 -0.311270 -0.726015  
O 0.139243 -0.633546 -1.911058  
O -0.487401 -0.397120 0.216076  
Mg -2.374870 -0.687348 -0.124738  
S -4.408474 0.188642 -1.661886  
O -5.468584 1.174916 -1.522265  
O -4.451820 -1.016056 -0.778399  
O -2.993378 0.683189 -1.642758  
C -4.611357 -0.492094 -3.362314  
F -4.558346 0.495756 -4.255995  
F -5.788238 -1.111355 -3.461316  
F -3.638217 -1.370289 -3.631974  
S -3.345379 -0.574777 2.372592  
O -3.096107 0.596413 1.476417  
O -2.917346 -0.464259 3.759992  
O -2.901458 -1.796579 1.626104  
C -5.217467 -0.709446 2.444881  
F -5.635844 -0.428682 3.681442  
F -5.604868 -1.946596 2.133889  
F -5.784160 0.150233 1.601433  
C -1.331665 -2.548426 -2.353746  
O -1.961989 -2.456445 -1.358198  
O -0.829600 -2.813472 -3.368505

#### TS\_G1G2

Mn 2.274494 0.425368 -0.104428  
O 4.988511 1.557219 0.377107  
O 1.942620 2.124495 -2.474288  
O 3.500818 -0.973401 -2.375924  
N 2.126082 -1.060270 1.403073  
N 1.215537 1.454089 1.429390  
C 3.905281 1.118273 0.307116  
C 2.033781 1.544685 -1.461750  
C 3.025261 -0.525035 -1.406423  
C 2.630783 -2.318645 1.375838  
C 2.198217 -3.302018 2.266309  
H 2.627526 -4.298639 2.193129  
C 1.238010 -3.000223 3.221367  
H 0.873556 -3.759588 3.909346  
C 0.769513 -1.699895 3.292491  
H 0.024912 -1.432697 4.035225  
C 1.239375 -0.747552 2.384971  
C 0.810052 0.650281 2.448032  
C 0.055420 1.129270 3.520555  
H -0.231530 0.468976 4.331038  
C -0.329451 2.458564 3.545623  
H -0.927633 2.847893 4.366445  
C 0.079499 3.278844 2.505720  
H -0.185358 4.333469 2.480365  
C 0.860166 2.759032 1.470507  
C 3.702148 -2.685483 0.415737  
C 5.028500 -2.300196 0.680082  
C 6.036728 -2.729062 -0.187843  
H 7.066355 -2.427235 0.012276  
C 5.766081 -3.550277 -1.283783  
C 4.441298 -3.937664 -1.507969  
H 4.206634 -4.568365 -2.367455  
C 3.403086 -3.517522 -0.679498  
C 5.377865 -1.510069 1.906313

H 5.387594 -2.154596 2.797455  
H 4.659398 -0.707768 2.109376  
H 6.372672 -1.059682 1.818913  
C 6.858683 -3.995310 -2.207178  
H 6.755928 -3.535323 -3.199372  
H 6.838041 -5.081085 -2.365249  
H 7.848811 -3.728126 -1.821703  
C 1.983048 -3.890423 -0.986046  
H 1.902996 -4.370863 -1.967673  
H 1.334284 -3.002432 -0.991738  
H 1.563314 -4.582857 -0.243354  
C 1.297033 3.708304 0.414170  
C 2.511397 4.399103 0.557277  
C 2.854844 5.356171 -0.402910  
H 3.803370 5.886647 -0.301795  
C 2.007431 5.667761 -1.467471  
C 0.789947 4.986035 -1.565758  
H 0.117775 5.208625 -2.396543  
C 0.420883 4.007618 -0.645682  
C 3.395699 4.175247 1.748074  
H 4.433055 4.455223 1.534087  
H 3.390420 3.133394 2.088269  
H 3.064398 4.786156 2.600544  
C 2.391747 6.694782 -2.488450  
H 3.298669 7.236180 -2.197129  
H 1.592480 7.430830 -2.642486  
H 2.582656 6.234368 -3.467307  
C -0.857936 3.242646 -0.806591  
H -1.351750 3.483523 -1.754336  
H -1.572604 3.448371 0.003548  
H -0.679624 2.157616 -0.786807  
C 0.412613 -0.386622 -0.720293  
O 0.226791 -0.797133 -1.900962  
O -0.498592 -0.452386 0.183066  
Mg -2.389326 -0.790149 -0.123748  
S -4.395484 0.112349 -1.673888  
O -5.430632 1.125132 -1.533904  
O -4.462277 -1.081625 -0.776529  
O -2.969121 0.573411 -1.670472  
C -4.633899 -0.578610 -3.365730  
F -4.575231 0.403207 -4.266614  
F -5.825699 -1.173148 -3.442532  
F -3.684388 -1.476992 -3.643641  
S -3.349899 -0.617360 2.371908  
O -3.094434 0.535086 1.454015  
O -2.925586 -0.483081 3.758242  
O -2.906137 -1.854722 1.649335  
C -5.222936 -0.748465 2.442115  
F -5.641265 -0.470360 3.679142  
F -5.613259 -1.983550 2.127274  
F -5.785825 0.115375 1.600639  
C -1.187009 -2.411007 -2.364092  
O -1.899597 -2.425576 -1.406337  
O -0.732355 -2.724543 -3.395146

#### G2

Mn 2.410645 0.093372 0.048891  
O 5.216390 0.072170 1.078027  
O 3.062131 2.344273 -1.724584  
O 3.434508 -0.980633 -2.489654  
N 1.718535 -1.606360 1.118638  
N 1.556083 0.994538 1.776760  
C 4.099019 0.062335 0.744916  
C 2.773731 1.542223 -0.926415  
C 2.997674 -0.683325 -1.448976  
C 1.820253 -2.907168 0.756836  
C 1.202958 -3.923877 1.488981

|    |           |           |           |    |           |           |           |
|----|-----------|-----------|-----------|----|-----------|-----------|-----------|
| H  | 1.307776  | -4.950770 | 1.146742  | O  | -3.116296 | -0.287112 | 1.673814  |
| C  | 0.476473  | -3.614292 | 2.626460  | O  | -2.819316 | -2.483119 | 2.871719  |
| H  | -0.014448 | -4.390450 | 3.208982  | O  | -2.712451 | -2.255886 | 0.359353  |
| C  | 0.388916  | -2.286717 | 3.008703  | C  | -5.097554 | -2.093694 | 1.566592  |
| H  | -0.172908 | -2.022895 | 3.896447  | F  | -5.437395 | -3.047281 | 2.437557  |
| C  | 1.005515  | -1.302049 | 2.235962  | F  | -5.437680 | -2.498648 | 0.344662  |
| C  | 0.913932  | 0.117826  | 2.592945  | F  | -5.772875 | -0.983573 | 1.863607  |
| C  | 0.196749  | 0.539635  | 3.714164  | C  | -0.885959 | 0.074423  | -2.811088 |
| H  | -0.318672 | -0.177657 | 4.343496  | O  | -1.810980 | -0.575658 | -2.254921 |
| C  | 0.135056  | 1.888470  | 4.019582  | O  | -0.787324 | 0.553612  | -3.921558 |
| H  | -0.421618 | 2.234971  | 4.887123  |    |           |           |           |
| C  | 0.801399  | 2.780148  | 3.195137  | H1 |           |           |           |
| H  | 0.789029  | 3.849540  | 3.391931  | Mn | -2.685352 | 1.427121  | 0.110461  |
| C  | 1.501675  | 2.311974  | 2.080564  | O  | -5.085097 | 3.156140  | 0.546522  |
| C  | 2.592120  | -3.308880 | -0.445857 | O  | -2.222072 | 1.475957  | 3.015017  |
| C  | 3.974897  | -3.542289 | -0.345514 | O  | -4.330688 | -0.682689 | 1.337238  |
| C  | 4.659348  | -3.996808 | -1.474380 | N  | -2.926774 | 1.167018  | -1.988586 |
| H  | 5.734928  | -4.169087 | -1.404232 | N  | -1.458913 | 2.984688  | -0.675840 |
| C  | 4.003840  | -4.248434 | -2.681518 | C  | -4.139760 | 2.526536  | 0.299613  |
| C  | 2.623672  | -4.038434 | -2.742358 | C  | -2.334056 | 1.571886  | 1.858834  |
| H  | 2.094713  | -4.228139 | -3.678091 | C  | -3.695644 | 0.079302  | 0.727420  |
| C  | 1.902976  | -3.572152 | -1.644361 | C  | -3.753999 | 0.300222  | -2.621592 |
| C  | 4.698388  | -3.366791 | 0.956464  | C  | -3.718060 | 0.137661  | -4.008226 |
| H  | 4.628266  | -4.276998 | 1.569806  | H  | -4.397294 | -0.577232 | -4.466558 |
| H  | 4.286483  | -2.551154 | 1.561347  | C  | -2.843455 | 0.892297  | -4.773004 |
| H  | 5.763999  | -3.166484 | 0.798370  | H  | -2.805253 | 0.780956  | -5.853917 |
| C  | 4.763807  | -4.700771 | -3.890337 | C  | -2.032157 | 1.812308  | -4.130536 |
| H  | 5.041920  | -3.847128 | -4.524437 | H  | -1.361389 | 2.435934  | -4.711205 |
| H  | 4.168628  | -5.376718 | -4.515515 | C  | -2.091146 | 1.932016  | -2.741434 |
| H  | 5.693605  | -5.213326 | -3.618407 | C  | -1.271258 | 2.911195  | -2.019704 |
| C  | 0.425111  | -3.338727 | -1.746433 | C  | -0.341056 | 3.713254  | -2.680160 |
| H  | 0.109120  | -3.237366 | -2.790902 | H  | -0.195152 | 3.624059  | -3.750755 |
| H  | 0.113545  | -2.432178 | -1.213111 | C  | 0.416333  | 4.619009  | -1.955868 |
| H  | -0.150690 | -4.167314 | -1.308518 | H  | 1.157530  | 5.241451  | -2.451451 |
| C  | 2.197053  | 3.325568  | 1.246012  | C  | 0.193487  | 4.723194  | -0.592779 |
| C  | 3.533998  | 3.653018  | 1.534878  | H  | 0.741279  | 5.437594  | 0.017081  |
| C  | 4.146902  | 4.676208  | 0.807938  | C  | -0.756233 | 3.904793  | 0.024059  |
| H  | 5.186788  | 4.926405  | 1.025508  | C  | -4.774879 | -0.469248 | -1.865762 |
| C  | 3.457126  | 5.403223  | -0.164039 | C  | -6.022466 | 0.125351  | -1.603335 |
| C  | 2.119199  | 5.079918  | -0.405249 | C  | -6.996374 | -0.628648 | -0.943656 |
| H  | 1.562590  | 5.638129  | -1.160230 | H  | -7.961851 | -0.167242 | -0.728955 |
| C  | 1.475133  | 4.048725  | 0.276664  | C  | -6.775480 | -1.956194 | -0.573035 |
| C  | 4.276915  | 2.975598  | 2.648195  | C  | -5.542840 | -2.535347 | -0.889554 |
| H  | 5.359477  | 3.004799  | 2.481524  | H  | -5.349917 | -3.572842 | -0.609356 |
| H  | 3.982469  | 1.928483  | 2.779206  | C  | -4.538274 | -1.816327 | -1.532536 |
| H  | 4.084423  | 3.477446  | 3.607738  | C  | -6.344409 | 1.508866  | -2.085601 |
| C  | 4.134993  | 6.488193  | -0.943289 | H  | -6.688340 | 1.484049  | -3.129905 |
| H  | 5.039429  | 6.846677  | -0.438979 | H  | -5.481133 | 2.183314  | -2.059974 |
| H  | 3.471076  | 7.345489  | -1.107214 | H  | -7.146304 | 1.962088  | -1.492814 |
| H  | 4.438526  | 6.132166  | -1.937649 | C  | -7.820517 | -2.736509 | 0.162720  |
| C  | 0.066747  | 3.679587  | -0.080034 | H  | -8.813785 | -2.286141 | 0.057029  |
| H  | -0.441181 | 4.500352  | -0.598484 | H  | -7.596959 | -2.779887 | 1.237824  |
| H  | -0.536643 | 3.402956  | 0.793272  | H  | -7.874537 | -3.774212 | -0.187681 |
| H  | 0.044316  | 2.811610  | -0.756711 | C  | -3.205361 | -2.442032 | -1.801741 |
| C  | 0.492320  | 0.116356  | -0.692441 | H  | -3.195957 | -3.498821 | -1.514871 |
| O  | 0.367473  | 0.232726  | -2.031210 | H  | -2.415430 | -1.935236 | -1.231969 |
| O  | -0.511754 | 0.037736  | 0.043913  | H  | -2.918230 | -2.374691 | -2.860189 |
| Mg | -2.434852 | -0.266375 | -0.407949 | C  | -1.009076 | 4.117154  | 1.471487  |
| S  | -4.429366 | 1.495587  | -0.804865 | C  | -2.071117 | 4.961970  | 1.853612  |
| O  | -5.425995 | 2.166482  | 0.018152  | C  | -2.264564 | 5.224650  | 3.210132  |
| O  | -4.531674 | 0.008904  | -0.936117 | H  | -3.090267 | 5.873512  | 3.507246  |
| O  | -2.991254 | 1.821011  | -0.549995 | C  | -1.408715 | 4.712449  | 4.189637  |
| C  | -4.732191 | 2.119263  | -2.511542 | C  | -0.336923 | 3.919556  | 3.777743  |
| F  | -4.633851 | 3.452032  | -2.525715 | H  | 0.347210  | 3.515633  | 4.526090  |
| F  | -5.961356 | 1.771021  | -2.903200 | C  | -0.123179 | 3.604103  | 2.434802  |
| F  | -3.844280 | 1.611761  | -3.364429 | C  | -2.924623 | 5.649487  | 0.829074  |
| S  | -3.249950 | -1.775584 | 1.674581  | H  | -2.421385 | 6.551341  | 0.450990  |

|         |           |           |           |    |           |           |           |
|---------|-----------|-----------|-----------|----|-----------|-----------|-----------|
| H       | -3.881375 | 5.968028  | 1.256660  | H  | -1.265982 | 2.306017  | -4.722226 |
| H       | -3.135321 | 5.023377  | -0.044992 | C  | -2.110067 | 1.837314  | -2.791715 |
| C       | -1.645309 | 4.993363  | 5.641489  | C  | -1.392483 | 2.882157  | -2.053474 |
| H       | -2.133513 | 5.962740  | 5.794286  | C  | -0.527065 | 3.765731  | -2.696808 |
| H       | -0.710736 | 4.984093  | 6.213993  | H  | -0.371129 | 3.705567  | -3.768033 |
| H       | -2.300323 | 4.233019  | 6.089377  | C  | 0.149091  | 4.720883  | -1.956461 |
| C       | 0.985623  | 2.663654  | 2.071437  | H  | 0.837852  | 5.409245  | -2.440226 |
| H       | 1.378232  | 2.821393  | 1.058586  | C  | -0.080004 | 4.782777  | -0.592028 |
| H       | 0.642999  | 1.617494  | 2.120729  | H  | 0.415659  | 5.522695  | 0.031657  |
| H       | 1.817817  | 2.751991  | 2.776810  | C  | -0.972903 | 3.891045  | 0.007019  |
| C       | -1.050102 | 0.194942  | 0.022611  | C  | -4.705752 | -0.691633 | -2.005120 |
| O       | -0.790299 | -0.821119 | 0.668947  | C  | -6.003147 | -0.170001 | -1.848297 |
| O       | 1.923462  | 0.509553  | -1.919156 | C  | -6.967765 | -0.959322 | -1.217010 |
| C       | 1.227965  | 0.255278  | -0.919947 | H  | -7.971444 | -0.553037 | -1.080988 |
| O       | -0.069013 | 0.621123  | -0.936262 | C  | -6.687501 | -2.251163 | -0.769947 |
| O       | 1.745191  | -0.301059 | 0.119461  | C  | -5.404117 | -2.763123 | -0.987095 |
| Mg      | 3.554653  | -0.486923 | -0.931912 | H  | -5.163459 | -3.772790 | -0.648119 |
| S       | 5.644969  | 1.109013  | -1.373120 | C  | -4.409623 | -2.009201 | -1.603889 |
| O       | 6.999135  | 1.270882  | -0.870482 | C  | -6.382478 | 1.170649  | -2.403874 |
| O       | 4.511863  | 1.401989  | -0.442566 | H  | -6.724293 | 1.074120  | -3.444594 |
| O       | 5.310804  | -0.191576 | -2.048956 | H  | -5.549310 | 1.881794  | -2.417053 |
| C       | 5.468275  | 2.352960  | -2.721597 | H  | -7.204873 | 1.620678  | -1.837001 |
| F       | 5.675550  | 3.576452  | -2.232842 | C  | -7.722588 | -3.063136 | -0.055417 |
| F       | 4.243497  | 2.293321  | -3.244926 | H  | -8.732720 | -2.673685 | -0.223600 |
| F       | 6.363751  | 2.103789  | -3.677824 | H  | -7.547713 | -3.055722 | 1.029537  |
| S       | 2.181881  | -3.398649 | -1.347933 | H  | -7.701998 | -4.113958 | -0.368252 |
| O       | 3.035418  | -2.261332 | -1.795348 | C  | -3.033708 | -2.567173 | -1.787215 |
| O       | 1.617298  | -3.209457 | 0.017582  | H  | -2.971203 | -3.603102 | -1.438255 |
| O       | 2.718217  | -4.720967 | -1.614409 | H  | -2.294556 | -1.983772 | -1.224719 |
| C       | 0.709903  | -3.202851 | -2.443170 | H  | -2.712702 | -2.543218 | -2.837638 |
| F       | -0.112973 | -4.240712 | -2.319253 | C  | -1.214371 | 4.044854  | 1.464588  |
| F       | 1.098851  | -3.101570 | -3.712436 | C  | -2.218114 | 4.929066  | 1.904663  |
| F       | 0.053201  | -2.083415 | -2.099810 | C  | -2.373371 | 5.132427  | 3.276778  |
| Mg      | 0.958368  | -1.754950 | 1.305476  | H  | -3.158989 | 5.806123  | 3.623137  |
| S       | 4.112885  | -1.552581 | 2.138583  | C  | -1.540100 | 4.514658  | 4.212722  |
| O       | 4.968698  | -2.486500 | 2.848980  | C  | -0.531113 | 3.669787  | 3.744877  |
| O       | 2.657759  | -1.660242 | 2.451579  | H  | 0.125717  | 3.173633  | 4.461539  |
| O       | 4.396227  | -1.434528 | 0.679925  | C  | -0.353249 | 3.420020  | 2.384958  |
| C       | 4.527670  | 0.122693  | 2.782788  | C  | -3.067543 | 5.693480  | 0.932969  |
| F       | 4.471277  | 0.120792  | 4.115515  | H  | -2.587289 | 6.644493  | 0.660730  |
| F       | 3.656301  | 1.016799  | 2.313362  | H  | -4.044288 | 5.939445  | 1.364319  |
| F       | 5.757778  | 0.461146  | 2.396037  | H  | -3.236511 | 5.152108  | -0.004294 |
| S       | -0.702368 | -4.173819 | 2.750080  | C  | -1.742180 | 4.727401  | 5.681178  |
| O       | -1.560155 | -4.295347 | 3.925957  | H  | -2.256725 | 5.672608  | 5.887793  |
| O       | 0.199079  | -5.280272 | 2.433340  | H  | -0.791020 | 4.726402  | 6.226213  |
| O       | -0.051496 | -2.817409 | 2.655019  | H  | -2.355738 | 3.925714  | 6.115485  |
| C       | -1.862277 | -4.104297 | 1.320853  | C  | 0.718812  | 2.480101  | 1.922767  |
| F       | -2.489348 | -5.275522 | 1.161527  | H  | 0.476643  | 2.017597  | 0.959142  |
| F       | -1.173662 | -3.839639 | 0.198876  | H  | 0.885917  | 1.677024  | 2.651951  |
| F       | -2.782162 | -3.151889 | 1.488803  | H  | 1.679865  | 2.996964  | 1.789165  |
| TS-H1H2 |           |           |           | C  | -1.308155 | 0.164794  | 0.198525  |
| Mn      | -2.852126 | 1.389445  | 0.022746  | O  | -0.845548 | -0.740309 | 0.792311  |
| O       | -5.230390 | 3.210148  | 0.021664  | O  | 2.099810  | 0.483116  | -1.990985 |
| O       | -2.791492 | 1.645610  | 2.962497  | C  | 1.258651  | 0.323366  | -1.050523 |
| O       | -4.655206 | -0.637637 | 1.192182  | O  | 0.041618  | 0.684604  | -1.147722 |
| N       | -2.947677 | 1.047064  | -2.070501 | O  | 1.745419  | -0.236167 | 0.056935  |
| N       | -1.608352 | 2.939400  | -0.714090 | Mg | 3.572882  | -0.440645 | -0.912769 |
| C       | -4.300466 | 2.523845  | -0.027337 | S  | 5.787519  | 0.998483  | -1.438547 |
| C       | -2.722842 | 1.661691  | 1.802435  | O  | 7.158969  | 1.094987  | -0.961204 |
| C       | -3.954081 | 0.077143  | 0.603144  | O  | 4.695314  | 1.421035  | -0.514196 |
| C       | -3.683097 | 0.112836  | -2.721129 | O  | 5.364792  | -0.305408 | -2.049018 |
| C       | -3.545444 | -0.091128 | -4.095763 | C  | 5.684035  | 2.189042  | -2.840484 |
| H       | -4.151312 | -0.858530 | -4.571409 | F  | 5.952996  | 3.421386  | -2.402188 |
| C       | -2.662078 | 0.685879  | -4.826881 | F  | 4.462323  | 2.176155  | -3.374627 |
| H       | -2.540912 | 0.538551  | -5.897328 | F  | 6.572045  | 1.857133  | -3.780700 |
| C       | -1.948523 | 1.672336  | -4.167180 | S  | 2.296189  | -3.438675 | -1.154659 |
|         |           |           |           | O  | 3.172725  | -2.339675 | -1.636826 |

O 1.725147 -3.192271 0.202463  
O 2.805541 -4.782929 -1.363592  
C 0.824571 -3.268061 -2.253925  
F 0.003432 -4.307196 -2.109500  
F 1.211643 -3.192938 -3.526650  
F 0.164507 -2.145493 -1.934448  
Mg 1.106461 -1.607612 1.336165  
S 4.197954 -1.331310 2.217090  
O 5.076024 -2.204187 2.977221  
O 2.744215 -1.466043 2.533622  
O 4.474189 -1.277212 0.756514  
C 4.555294 0.380446 2.791987  
F 4.427502 0.444948 4.119470  
F 3.696740 1.234140 2.233165  
F 5.799828 0.720490 2.457469  
S -0.723347 -3.822695 2.982572  
O -1.614667 -3.728720 4.135667  
O 0.092423 -5.026210 2.834738  
O 0.037646 -2.545378 2.740827  
C -1.840326 -3.848915 1.516217  
F -2.517590 -4.999542 1.451226  
F -1.103920 -3.729011 0.399353  
F -2.721367 -2.843646 1.551671

C2-MgOTf2-1

Mn -0.465349 -0.581479 0.028183  
O -0.441863 1.678369 -1.877008  
O -0.455383 1.758359 1.834758  
N -1.191143 -2.021517 1.368666  
N -1.183221 -2.085164 -1.250483  
C -0.499159 0.735309 -1.176058  
C -0.507545 0.786785 1.173223  
C -1.038577 -2.037198 2.725391  
C -1.728187 -2.939087 3.528765  
H -1.582136 -2.892292 4.605866  
C -2.562209 -3.896698 2.957982  
H -3.111227 -4.602790 3.576398  
C -2.638979 -3.952650 1.580037  
H -3.247607 -4.711617 1.100344  
C -1.938849 -3.019780 0.807451  
C -1.927543 -3.060089 -0.644822  
C -2.601571 -4.046808 -1.372437  
H -3.196012 -4.794452 -0.858071  
C -2.512181 -4.062792 -2.750540  
H -3.040049 -4.812319 -3.335309  
C -1.693501 -3.118721 -3.364240  
H -1.541867 -3.123399 -4.441577  
C -1.024090 -2.165504 -2.603935  
C -0.062396 -1.126191 3.375876  
C -0.507887 -0.041975 4.147141  
C 0.435501 0.767926 4.784722  
H 0.087660 1.625706 5.363200  
C 1.804980 0.532985 4.669482  
C 2.223263 -0.575688 3.923965  
H 3.289826 -0.799894 3.850074  
C 1.313936 -1.425614 3.295373  
C -1.969069 0.281682 4.243690  
H -2.493692 -0.380074 4.947240  
H -2.473375 0.171779 3.274191  
H -2.123850 1.311347 4.585636  
C 2.806825 1.439752 5.316111  
H 3.554489 0.876862 5.889293  
H 2.327622 2.154752 5.994045  
H 3.361684 2.019492 4.565559  
C 1.800735 -2.671608 2.617272  
H 2.894093 -2.677164 2.545737  
H 1.395240 -2.789540 1.603862

H 1.501357 -3.566233 3.182392  
C -0.064372 -1.269606 -3.299693  
C -0.531397 -0.226474 -4.114074  
C 0.394352 0.562276 -4.801234  
H 0.029099 1.385445 -5.418004  
C 1.768344 0.350007 -4.690857  
C 2.208388 -0.714713 -3.895991  
H 3.278345 -0.921528 -3.822189  
C 1.316035 -1.547072 -3.220200  
C -1.997176 0.076261 -4.205219  
H -2.528738 -0.637679 -4.850059  
H -2.169372 1.078517 -4.613629  
H -2.480369 0.028619 -3.220152  
C 2.749570 1.235915 -5.395724  
H 2.263766 1.845762 -6.165624  
H 3.549524 0.656937 -5.873753  
H 3.239935 1.926397 -4.695542  
C 1.823821 -2.755180 -2.491039  
H 1.427443 -2.831331 -1.470104  
H 2.917894 -2.746415 -2.429417  
H 1.530258 -3.677840 -3.012425  
C 1.250149 -0.769182 0.040519  
O 2.452780 -0.670430 0.047777  
Mg -2.956638 0.422305 0.004212

S -4.954324 -1.407873 0.009173  
O -5.287980 -2.822699 0.040498  
O -4.237718 -0.877964 -1.194370  
O -4.269909 -0.818941 1.205447  
C -6.574177 -0.529174 -0.033413  
F -7.251931 -0.877973 -1.127131  
F -6.368170 0.791998 -0.051861  
F -7.291703 -0.840726 1.046106  
S -3.924861 2.940581 -0.052790  
O -3.586880 2.133570 1.163987  
O -5.201433 3.637627 -0.067972  
O -3.591732 2.073462 -1.229159  
C -2.658870 4.281220 -0.093722  
F -1.432185 3.775680 -0.071991  
F -2.825977 5.078177 0.965753  
F -2.819605 5.000438 -1.208297  
Mg 4.106026 0.420158 0.029549  
S 5.960250 -1.469159 -0.002702  
O 7.405181 -1.602969 -0.021514  
O 5.304791 -0.812892 -1.186440  
O 5.333155 -0.830340 1.205967  
C 5.306253 -3.197666 -0.012068  
F 5.669154 -3.790804 -1.148523  
F 3.979049 -3.198946 0.079247  
F 5.818282 -3.862667 1.022074  
S 3.023862 2.815133 -0.024791  
O 3.393748 2.009912 1.192891  
O 1.739125 3.481901 -0.041274  
O 3.392299 1.950886 -1.201404  
C 4.298144 4.149231 -0.062541  
F 4.152190 4.941257 0.997685  
F 4.159510 4.867016 -1.175226  
F 5.518275 3.605009 -0.040040

C2-MgOTf2-2

Mn 1.079050 -1.105504 -0.448924  
O 0.430530 -1.309988 2.422364  
O -1.109292 0.840175 -0.203964  
N 1.688254 -0.641596 -2.408065  
N 3.101179 -1.716549 -0.470710  
C 0.780356 -1.249943 1.304563  
C -0.150709 0.100523 -0.351083  
C 0.907017 -0.160741 -3.415828



|       |           |           |           |
|-------|-----------|-----------|-----------|
| C     | 1.445760  | 0.277095  | -4.621479 |
| H     | 0.771085  | 0.659764  | -5.384151 |
| C     | 2.817689  | 0.212533  | -4.843286 |
| H     | 3.251484  | 0.555786  | -5.779332 |
| C     | 3.611503  | -0.318514 | -3.846573 |
| H     | 4.683256  | -0.398824 | -3.992672 |
| C     | 3.030827  | -0.744201 | -2.646580 |
| C     | 3.813895  | -1.334502 | -1.574959 |
| C     | 5.198283  | -1.510617 | -1.673501 |
| H     | 5.729347  | -1.175175 | -2.557567 |
| C     | 5.891193  | -2.099539 | -0.634228 |
| H     | 6.969918  | -2.226855 | -0.682609 |
| C     | 5.158891  | -2.568305 | 0.452455  |
| H     | 5.644061  | -3.102445 | 1.266719  |
| C     | 3.778924  | -2.400386 | 0.498715  |
| C     | -0.573505 | -0.100616 | -3.283576 |
| C     | -1.195190 | 1.146824  | -3.102460 |
| C     | -2.591764 | 1.218980  | -3.119465 |
| H     | -3.067599 | 2.191148  | -2.996943 |
| C     | -3.389304 | 0.084290  | -3.320170 |
| C     | -2.742819 | -1.145308 | -3.488885 |
| H     | -3.342603 | -2.038252 | -3.661747 |
| C     | -1.349897 | -1.255782 | -3.498760 |
| C     | -0.389935 | 2.387177  | -2.858671 |
| H     | -0.026547 | 2.828909  | -3.797058 |
| H     | 0.494404  | 2.184436  | -2.241612 |
| H     | -0.990184 | 3.149545  | -2.348327 |
| C     | -4.881246 | 0.198864  | -3.415185 |
| H     | -5.177502 | 0.568020  | -4.406725 |
| H     | -5.287763 | 0.906490  | -2.681420 |
| H     | -5.370293 | -0.768356 | -3.261587 |
| C     | -0.712993 | -2.572775 | -3.825691 |
| H     | -1.374971 | -3.407731 | -3.570796 |
| H     | 0.239201  | -2.723188 | -3.304941 |
| H     | -0.502085 | -2.638586 | -4.903012 |
| C     | 3.041966  | -3.086529 | 1.589705  |
| C     | 3.111687  | -2.615404 | 2.909517  |
| C     | 2.486100  | -3.346584 | 3.922015  |
| H     | 2.525509  | -2.969415 | 4.945564  |
| C     | 1.793149  | -4.527601 | 3.656707  |
| C     | 1.757842  | -4.989874 | 2.336078  |
| H     | 1.246103  | -5.927632 | 2.110879  |
| C     | 2.388645  | -4.303057 | 1.299289  |
| C     | 3.813624  | -1.330043 | 3.229856  |
| H     | 4.899901  | -1.468462 | 3.328421  |
| H     | 3.453557  | -0.907066 | 4.174655  |
| H     | 3.662821  | -0.575860 | 2.447350  |
| C     | 1.096142  | -5.280285 | 4.748523  |
| H     | 1.398820  | -4.927014 | 5.740570  |
| H     | 1.299842  | -6.357021 | 4.693625  |
| H     | 0.005646  | -5.165690 | 4.679478  |
| C     | 2.440054  | -4.899796 | -0.076230 |
| H     | 2.197731  | -4.172639 | -0.860752 |
| H     | 1.743484  | -5.740220 | -0.169229 |
| H     | 3.447642  | -5.280187 | -0.299224 |
| C     | 0.140009  | -2.612570 | -0.692829 |
| O     | -0.598969 | -3.525988 | -0.683467 |
| Mg    | 2.068637  | 1.247313  | 0.347042  |
| S     | 4.324420  | 2.079997  | -0.893435 |
| O     | 5.347132  | 1.703505  | -1.855412 |
| O     | 4.219987  | 1.283445  | 0.373619  |
| O     | 2.923828  | 2.262258  | -1.390570 |
| C     | 4.812465  | 3.757783  | -0.303819 |
| F     | 6.034552  | 3.709242  | 0.226574  |
| F     | 3.951323  | 4.180925  | 0.625599  |
| F     | 4.808756  | 4.616472  | -1.323444 |
| S     | 1.290546  | 2.887596  | 2.339855  |
| O     | 0.972173  | 3.010972  | 0.878848  |
| O     | 1.763003  | 4.079766  | 3.025637  |
| O     | 2.094843  | 1.633086  | 2.483791  |
| C     | -0.322480 | 2.484712  | 3.139091  |
| F     | -0.837324 | 1.374332  | 2.618479  |
| F     | -1.174755 | 3.493706  | 2.957633  |
| F     | -0.129328 | 2.304010  | 4.448405  |
| Mg    | -3.066070 | 0.386386  | -0.379218 |
| S     | -4.223971 | -1.837777 | 0.510070  |
| O     | -5.057130 | -2.099489 | 1.672890  |
| O     | -2.802470 | -1.432259 | 0.742210  |
| O     | -4.758561 | -0.884195 | -0.523525 |
| C     | -4.123253 | -3.458372 | -0.366156 |
| F     | -3.516412 | -4.345578 | 0.422182  |
| F     | -3.445693 | -3.343409 | -1.505358 |
| F     | -5.358968 | -3.885902 | -0.638427 |
| S     | -4.260264 | 2.532893  | 0.732964  |
| O     | -3.918501 | 2.288397  | -0.712331 |
| O     | -3.903745 | 3.827344  | 1.288270  |
| O     | -3.834845 | 1.302818  | 1.465928  |
| C     | -6.104740 | 2.496747  | 0.755957  |
| F     | -6.573051 | 3.540452  | 0.069068  |
| F     | -6.536165 | 2.570617  | 2.015834  |
| F     | -6.558713 | 1.373969  | 0.202255  |
| B1-K+ |           |           |           |
| Mn    | 0.007668  | 0.075239  | 0.370647  |
| O     | 0.099934  | -1.506093 | -2.144776 |
| O     | -1.709274 | -1.997817 | 1.545769  |
| O     | 1.645658  | -1.882362 | 1.828107  |
| N     | 1.325132  | 1.696175  | 0.213451  |
| N     | -1.299083 | 1.704533  | 0.218066  |
| C     | 0.079194  | -0.804272 | -1.208485 |
| C     | -1.129895 | -1.093181 | 1.045724  |
| C     | 1.098104  | -1.027278 | 1.216573  |
| C     | 2.669529  | 1.647577  | 0.026643  |
| C     | 3.466460  | 2.778432  | 0.192502  |
| H     | 4.539385  | 2.690535  | 0.038589  |
| C     | 2.885255  | 3.994418  | 0.531909  |
| H     | 3.494579  | 4.884521  | 0.668797  |
| C     | 1.507278  | 4.059039  | 0.659191  |
| H     | 1.025252  | 5.005535  | 0.882467  |
| C     | 0.748171  | 2.901092  | 0.483543  |
| C     | -0.713581 | 2.901500  | 0.506468  |
| C     | -1.466801 | 4.051066  | 0.748635  |
| H     | -0.978340 | 4.985802  | 1.005195  |
| C     | -2.847802 | 3.990865  | 0.654222  |
| H     | -3.453022 | 4.874006  | 0.844087  |
| C     | -3.438021 | 2.789950  | 0.278467  |
| H     | -4.514017 | 2.709919  | 0.143008  |
| C     | -2.647406 | 1.664154  | 0.056126  |
| C     | 3.291224  | 0.373524  | -0.409016 |
| C     | 3.148663  | -0.037943 | -1.750406 |
| C     | 3.746103  | -1.231723 | -2.150668 |
| H     | 3.627809  | -1.556607 | -3.186073 |
| C     | 4.495778  | -2.015950 | -1.266535 |
| C     | 4.651223  | -1.564977 | 0.044349  |
| H     | 5.235745  | -2.159836 | 0.748332  |
| C     | 4.069034  | -0.374907 | 0.489359  |
| C     | 2.419866  | 0.812191  | -2.748875 |
| H     | 2.997868  | 1.714764  | -2.993943 |
| H     | 1.446175  | 1.156294  | -2.377915 |
| H     | 2.248949  | 0.265884  | -3.682671 |
| C     | 5.122495  | -3.296366 | -1.726691 |
| H     | 5.643604  | -3.807666 | -0.909949 |
| H     | 5.850798  | -3.121255 | -2.529586 |
| H     | 4.373695  | -3.988266 | -2.133514 |

C 4.260819 0.072532 1.907902  
H 4.616050 -0.752167 2.535567  
H 3.332939 0.456997 2.350205  
H 5.001935 0.880734 1.981410  
C -3.280191 0.408471 -0.413921  
C -3.106106 0.007632 -1.755783  
C -3.723195 -1.164727 -2.188664  
H -3.584823 -1.478541 -3.224971  
C -4.525495 -1.935929 -1.339789  
C -4.706494 -1.497994 -0.028074  
H -5.325440 -2.086842 0.651022  
C -4.101079 -0.333638 0.451617  
C -2.330439 0.849896 -2.725171  
H -2.858932 1.789562 -2.940678  
H -2.187447 0.325452 -3.676071  
H -1.340930 1.129488 -2.342852  
C -5.178536 -3.188762 -1.837254  
H -5.885215 -2.977180 -2.650685  
H -5.730744 -3.699985 -1.041179  
H -4.441645 -3.893918 -2.242887  
C -4.296939 0.080210 1.879784  
H -3.353832 0.384682 2.352245  
H -4.719669 -0.739871 2.470619  
H -4.982647 0.933905 1.969984  
K -0.091892 -3.653216 3.022619

#### B2-K+

Mn -0.000299 -0.157215 0.364394  
O 0.001152 -2.648019 -1.207382  
O -1.757294 -1.315923 2.422820  
O 1.755914 -1.312292 2.425561  
N 1.289936 1.279721 -0.353975  
N -1.291161 1.279977 -0.349868  
C 0.001221 -1.602053 -0.659342  
C -1.132002 -0.811654 1.555686  
C 1.131050 -0.809460 1.557237  
C 2.664238 1.193685 -0.477244  
C 3.446663 2.284799 -0.800885  
H 4.524499 2.148772 -0.865203  
C 2.862000 3.532477 -1.081725  
H 3.474243 4.394343 -1.335981  
C 1.489445 3.611099 -1.082382  
H 0.994941 4.539993 -1.353638  
C 0.713510 2.483361 -0.748509  
C -0.715895 2.484683 -0.742718  
C -1.492918 3.616538 -1.059850  
H -0.999368 4.548589 -1.321884  
C -2.865584 3.539153 -1.050927  
H -3.478636 4.404334 -1.291571  
C -3.449504 2.288946 -0.779709  
H -4.527683 2.153940 -0.840295  
C -2.666107 1.194977 -0.468394  
C 3.335746 -0.123837 -0.332888  
C 3.244947 -1.058793 -1.387094  
C 3.917583 -2.273833 -1.271858  
H 3.838775 -2.997271 -2.086002  
C 4.706215 -2.579710 -0.155934  
C 4.818229 -1.620380 0.849097  
H 5.432852 -1.835153 1.725405  
C 4.149929 -0.394072 0.778397  
C 2.495427 -0.731972 -2.644242  
H 3.007164 0.056393 -3.214872  
H 1.481778 -0.365483 -2.437681  
H 2.411478 -1.609719 -3.294727  
C 5.408989 -3.899110 -0.054355  
H 6.075178 -3.936399 0.814804  
H 6.009613 -4.108379 -0.949005

H 4.695382 -4.728731 0.040676  
C 4.298063 0.597554 1.894052  
H 4.614334 0.103965 2.819951  
H 3.359492 1.127713 2.100092  
H 5.049153 1.366051 1.663038  
C -3.336580 -0.123771 -0.331539  
C -3.242721 -1.054163 -1.389678  
C -3.914126 -2.270453 -1.280879  
H -3.833109 -2.990154 -2.098112  
C -4.704177 -2.582326 -0.167609  
C -4.819100 -1.627554 0.841401  
H -5.434837 -1.847000 1.715767  
C -4.152402 -0.400005 0.777134  
C -2.491328 -0.721534 -2.644195  
H -2.999884 0.072370 -3.209955  
H -2.409937 -1.595361 -3.300277  
H -1.476551 -0.359929 -2.434612  
C -5.405181 -3.903184 -0.073036  
H -6.003210 -4.109808 -0.970036  
H -6.073475 -3.945007 0.794300  
H -4.690518 -4.732077 0.020470  
C -4.303678 0.586200 1.897179  
H -3.367341 1.119837 2.104167  
H -4.616598 0.087139 2.821287  
H -5.058749 1.352044 1.670351  
K 0.003536 2.471247 2.242709

#### II

Mn 0.013168 -0.158246 0.230481  
O 0.148090 -2.580224 -1.433465  
O -1.735283 -1.596846 2.107322  
O 1.683454 -1.210837 2.416393  
N 1.313138 1.279370 -0.484003  
N -1.276438 1.287848 -0.432166  
C 0.115971 -1.551812 -0.845790  
C -1.124455 -0.970880 1.312257  
C 1.092866 -0.739963 1.504593  
C 2.680713 1.198444 -0.606114  
C 3.462878 2.280590 -0.965085  
H 4.541099 2.145177 -1.029189  
C 2.871185 3.519588 -1.266282  
H 3.476910 4.376370 -1.553133  
C 1.499203 3.599827 -1.225158  
H 1.000636 4.528059 -1.491675  
C 0.730396 2.482664 -0.848849  
C -0.696644 2.492432 -0.812237  
C -1.466528 3.628031 -1.121118  
H -0.967130 4.559159 -1.376390  
C -2.840633 3.566936 -1.103432  
H -3.447775 4.439771 -1.332320  
C -3.431455 2.318488 -0.836487  
H -4.511567 2.190543 -0.885488  
C -2.650731 1.217452 -0.542370  
C 3.367087 -0.103965 -0.396050  
C 3.375250 -1.057404 -1.435401  
C 4.064472 -2.254752 -1.249422  
H 4.060708 -2.995413 -2.052024  
C 4.773409 -2.522727 -0.071929  
C 4.785757 -1.545683 0.922767  
H 5.335782 -1.733051 1.847241  
C 4.097644 -0.336535 0.779514  
C 2.704705 -0.768723 -2.745446  
H 3.272229 -0.025554 -3.324204  
H 1.694747 -0.361282 -2.609749  
H 2.624893 -1.672958 -3.359200  
C 5.501644 -3.820836 0.103858  
H 6.229396 -3.989653 -0.700955

H 4.813467 -4.676486 0.082998  
H 6.043020 -3.854337 1.056006  
C 4.133537 0.682937 1.879927  
H 4.411306 0.221963 2.834663  
H 3.161277 1.174313 2.015090  
H 4.865504 1.477715 1.676802  
C -3.338710 -0.093972 -0.412453  
C -3.292306 -1.008729 -1.486687  
C -3.995845 -2.207943 -1.384346  
H -3.952205 -2.916090 -2.214597  
C -4.776850 -2.513713 -0.262779  
C -4.836479 -1.577521 0.768311  
H -5.434191 -1.798212 1.655035  
C -4.127973 -0.373356 0.714149  
C -2.550868 -0.677813 -2.747497  
H -3.042651 0.140486 -3.293035  
H -2.504738 -1.542627 -3.419097  
H -1.522816 -0.350030 -2.544825  
C -5.527819 -3.808257 -0.183520  
H -4.850461 -4.671848 -0.221590  
H -6.224674 -3.924672 -1.024302  
H -6.108167 -3.882270 0.743054  
C -4.184194 0.581114 1.870337  
H -3.203003 1.030875 2.072064  
H -4.515316 0.073419 2.783750  
H -4.880874 1.411859 1.689726  
C -0.190205 1.875288 2.969300  
O -0.571997 1.080090 3.739944  
O 0.188031 2.752213 2.290697

#### TS-III2

Mn 0.013922 -0.111796 0.351633  
O 0.205104 -2.398228 -1.492289  
O -1.761889 -1.822801 1.946943  
O 1.709453 -1.373492 2.402427  
N 1.323340 1.329951 -0.372157  
N -1.288411 1.331362 -0.342134  
C 0.152569 -1.410275 -0.846594  
C -1.144304 -1.083749 1.271944  
C 1.113744 -0.814692 1.551586  
C 2.680294 1.244555 -0.502289  
C 3.465255 2.345687 -0.812895  
H 4.542947 2.215130 -0.888126  
C 2.870043 3.588702 -1.050334  
H 3.472170 4.459941 -1.298789  
C 1.495092 3.668814 -1.001611  
H 0.998073 4.608197 -1.225243  
C 0.737360 2.535729 -0.667227  
C -0.703931 2.540772 -0.643592  
C -1.462550 3.687476 -0.917877  
H -0.964110 4.631259 -1.119504  
C -2.839845 3.620191 -0.929810  
H -3.442914 4.502888 -1.129746  
C -3.433352 2.368642 -0.731716  
H -4.512205 2.242788 -0.800654  
C -2.651258 1.254395 -0.470626  
C 3.357911 -0.071988 -0.371092  
C 3.350500 -0.957589 -1.464544  
C 4.038362 -2.168363 -1.356415  
H 4.023482 -2.859992 -2.201045  
C 4.755665 -2.508607 -0.206776  
C 4.782678 -1.591833 0.847517  
H 5.341605 -1.834638 1.753605  
C 4.100791 -0.376084 0.783071  
C 2.672250 -0.587983 -2.750165  
H 3.254147 0.166597 -3.299334  
H 1.675731 -0.159928 -2.584736

H 2.561136 -1.458735 -3.405671  
C 5.475658 -3.818903 -0.102308  
H 5.479232 -4.355571 -1.057670  
H 5.007551 -4.476951 0.642374  
H 6.518196 -3.685178 0.213682  
C 4.153308 0.581336 1.936708  
H 4.457206 0.072326 2.858234  
H 3.180809 1.055886 2.120449  
H 4.872795 1.393360 1.759088  
C -3.330981 -0.064991 -0.400874  
C -3.257564 -0.934995 -1.508952  
C -3.951200 -2.144053 -1.463751  
H -3.886984 -2.819569 -2.319260  
C -4.747468 -2.498441 -0.368441  
C -4.829151 -1.605057 0.699524  
H -5.436938 -1.866417 1.567925  
C -4.131390 -0.394521 0.704425  
C -2.498475 -0.547728 -2.743379  
H -2.999252 0.275467 -3.273200  
H -2.419181 -1.389579 -3.440362  
H -1.482517 -0.202211 -2.512597  
C -5.490241 -3.799904 -0.352856  
H -4.806748 -4.655709 -0.431676  
H -6.184607 -3.879627 -1.199893  
H -6.071822 -3.922375 0.567680  
C -4.193895 0.507610 1.900873  
H -3.189309 0.818823 2.220323  
H -4.673013 0.004613 2.748605  
H -4.761170 1.427070 1.701348  
C -0.229498 1.426187 2.474141  
O -0.651790 0.804996 3.426480  
O 0.125982 2.529001 2.117615

#### I2

Mn 0.013516 -0.101721 0.378976  
O 0.207815 -2.355585 -1.510046  
O -1.759823 -1.876496 1.904231  
O 1.712964 -1.403079 2.399863  
N 1.329039 1.338627 -0.355991  
N -1.289422 1.340091 -0.332396  
C 0.155492 -1.377500 -0.851213  
C -1.144699 -1.110661 1.259814  
C 1.117149 -0.831773 1.559065  
C 2.683067 1.251314 -0.487888  
C 3.469238 2.354927 -0.792939  
H 4.546762 2.224933 -0.870126  
C 2.873377 3.597232 -1.021517  
H 3.474663 4.470088 -1.266429  
C 1.497719 3.678527 -0.968356  
H 1.001355 4.619559 -1.185574  
C 0.742598 2.544135 -0.636444  
C -0.702632 2.549500 -0.614415  
C -1.457779 3.698689 -0.882428  
H -0.959211 4.644693 -1.071975  
C -2.835944 3.630789 -0.902028  
H -3.437358 4.515836 -1.096603  
C -3.431186 2.380263 -0.716916  
H -4.509949 2.255988 -0.788645  
C -2.649092 1.262787 -0.461834  
C 3.357972 -0.067342 -0.366262  
C 3.347858 -0.945033 -1.469092  
C 4.028534 -2.157956 -1.370826  
H 4.011612 -2.841735 -2.221948  
C 4.743912 -2.511054 -0.220798  
C 4.774301 -1.604262 0.838723  
H 5.331620 -1.857722 1.742610  
C 4.097261 -0.382649 0.784131

|         |           |           |           |    |           |           |           |
|---------|-----------|-----------|-----------|----|-----------|-----------|-----------|
| C       | 2.673556  | -0.558410 | -2.751920 | C  | -1.178562 | 4.861892  | -0.540828 |
| H       | 3.259003  | 0.201357  | -3.290008 | H  | -0.439620 | 5.137740  | -1.295200 |
| H       | 1.677824  | -0.129269 | -2.584765 | C  | -0.941264 | 3.736745  | 0.252597  |
| H       | 2.561956  | -1.420949 | -3.418021 | C  | -4.051430 | 3.811150  | 2.469443  |
| C       | 5.453340  | -3.828332 | -0.135617 | H  | -3.626567 | 3.912053  | 3.478063  |
| H       | 6.074270  | -4.012968 | -1.021534 | H  | -4.389517 | 2.770209  | 2.382099  |
| H       | 4.743127  | -4.664187 | -0.074581 | H  | -4.935109 | 4.455868  | 2.416630  |
| H       | 6.099862  | -3.882962 | 0.747409  | C  | -2.575228 | 6.824706  | -1.274221 |
| C       | 4.153724  | 0.563453  | 1.946693  | H  | -1.646586 | 7.215147  | -1.705542 |
| H       | 4.455247  | 0.044491  | 2.863412  | H  | -3.074342 | 7.639387  | -0.736258 |
| H       | 3.183464  | 1.040670  | 2.135067  | H  | -3.230372 | 6.553450  | -2.114051 |
| H       | 4.876964  | 1.373842  | 1.776909  | C  | 0.343846  | 2.975641  | 0.113723  |
| C       | -3.327335 | -0.057558 | -0.400409 | H  | 1.128842  | 3.421264  | 0.742082  |
| C       | -3.256353 | -0.917142 | -1.516327 | H  | 0.713857  | 2.992542  | -0.918303 |
| C       | -3.949043 | -2.127228 | -1.479488 | H  | 0.245249  | 1.929945  | 0.424233  |
| H       | -3.887250 | -2.795203 | -2.341020 | C  | -3.590373 | -2.962033 | -0.776497 |
| C       | -4.740968 | -2.491568 | -0.384517 | C  | -4.983476 | -3.131407 | -0.886690 |
| C       | -4.818278 | -1.608577 | 0.692673  | C  | -5.528465 | -3.403253 | -2.140920 |
| H       | -5.422013 | -1.878732 | 1.561164  | H  | -6.609929 | -3.518672 | -2.231861 |
| C       | -4.121088 | -0.398000 | 0.706534  | C  | -4.728423 | -3.525158 | -3.279955 |
| C       | -2.499622 | -0.518801 | -2.748774 | C  | -3.346100 | -3.389529 | -3.135194 |
| H       | -3.003109 | 0.306731  | -3.272380 | H  | -2.703584 | -3.500491 | -4.010464 |
| H       | -2.418601 | -1.355448 | -3.451774 | C  | -2.756175 | -3.120955 | -1.899116 |
| H       | -1.484324 | -0.171930 | -2.517164 | C  | -5.869000 | -3.038523 | 0.319745  |
| C       | -5.483491 | -3.793243 | -0.378047 | H  | -5.827105 | -3.958355 | 0.920609  |
| H       | -4.799642 | -4.648139 | -0.463276 | H  | -6.915379 | -2.885250 | 0.034122  |
| H       | -6.178096 | -3.867013 | -1.225369 | H  | -5.576824 | -2.220862 | 0.989808  |
| H       | -6.064504 | -3.922704 | 0.541876  | C  | -5.340212 | -3.768124 | -4.625019 |
| C       | -4.170552 | 0.490117  | 1.913827  | H  | -6.282271 | -4.323342 | -4.549311 |
| H       | -3.159276 | 0.744194  | 2.263893  | H  | -4.664631 | -4.324239 | -5.285169 |
| H       | -4.696768 | 0.000797  | 2.741366  | H  | -5.569340 | -2.819522 | -5.130894 |
| H       | -4.683658 | 1.440296  | 1.712298  | C  | -1.263555 | -3.056812 | -1.773321 |
| C       | -0.239360 | 1.355620  | 2.398485  | H  | -0.855926 | -4.031793 | -1.467321 |
| O       | -0.696121 | 0.766577  | 3.369610  | H  | -0.929776 | -2.328314 | -1.025132 |
| O       | 0.127759  | 2.485568  | 2.107362  | H  | -0.794298 | -2.798330 | -2.729687 |
| TS-J1J2 |           |           |           | C  | -1.349086 | 0.242615  | -0.956310 |
| Mn      | -3.096176 | 0.342569  | 0.071219  | O  | -0.887328 | 0.511258  | -1.998618 |
| O       | -5.708146 | 0.525313  | 1.501639  | O  | 1.968447  | -0.532437 | 0.966003  |
| O       | -4.471312 | -0.354146 | -2.438936 | C  | 1.144764  | -0.490768 | -0.029748 |
| O       | -3.686835 | 2.821744  | -1.405808 | O  | -0.132703 | -0.477560 | 0.226737  |
| N       | -2.039753 | 0.976078  | 1.804208  | O  | 1.626517  | -0.470756 | -1.221731 |
| N       | -2.689791 | -1.516037 | 1.016561  | Mg | 3.468463  | -0.412171 | -0.378324 |
| C       | -4.678373 | 0.445406  | 0.968522  | S  | 5.318999  | -2.252135 | 0.272058  |
| C       | -3.926060 | -0.220983 | -1.418159 | O  | 6.632912  | -2.710142 | -0.155518 |
| C       | -3.392877 | 1.925774  | -0.721901 | O  | 4.177653  | -2.438758 | -0.675584 |
| C       | -1.643451 | 2.229989  | 2.120137  | O  | 5.214682  | -0.861911 | 0.814682  |
| C       | -0.953630 | 2.502509  | 3.304830  | C  | 4.881779  | -3.325285 | 1.703704  |
| H       | -0.651789 | 3.527208  | 3.508353  | F  | 4.842746  | -4.601658 | 1.312331  |
| C       | -0.661628 | 1.476688  | 4.187077  | F  | 3.688650  | -2.985791 | 2.192592  |
| H       | -0.124846 | 1.669009  | 5.113032  | F  | 5.798460  | -3.193891 | 2.666209  |
| C       | -1.060030 | 0.191600  | 3.857351  | S  | 4.444907  | 1.746523  | -1.660051 |
| H       | -0.827214 | -0.629923 | 4.525394  | O  | 3.930522  | 2.696872  | -2.636788 |
| C       | -1.739719 | -0.035231 | 2.660683  | O  | 3.804822  | 1.734124  | -0.309877 |
| C       | -2.121278 | -1.390427 | 2.244445  | O  | 4.590736  | 0.322410  | -2.093369 |
| C       | -1.880284 | -2.496576 | 3.059448  | C  | 6.172746  | 2.297898  | -1.337170 |
| H       | -1.444272 | -2.372697 | 4.044333  | F  | 6.866234  | 2.297079  | -2.479204 |
| C       | -2.195174 | -3.766189 | 2.603736  | F  | 6.774231  | 1.488105  | -0.466013 |
| H       | -2.008822 | -4.638837 | 3.225156  | F  | 6.159423  | 3.537606  | -0.838585 |
| C       | -2.743406 | -3.894064 | 1.338912  |    |           |           |           |
| H       | -2.996068 | -4.868460 | 0.927612  |    |           |           |           |
| C       | -2.988682 | -2.756132 | 0.565890  |    |           |           |           |
| C       | -1.906129 | 3.374252  | 1.209461  |    |           |           |           |
| C       | -3.053487 | 4.166728  | 1.409495  |    |           |           |           |
| C       | -3.242466 | 5.287593  | 0.604551  |    |           |           |           |
| H       | -4.136727 | 5.896233  | 0.749757  |    |           |           |           |
| C       | -2.322990 | 5.645131  | -0.386833 |    |           |           |           |
